# Supplementary material for: Characterization of MicroRNA expression profiles in the ovarian tissue of goats during the sexual maturity period
Source: J Ovarian Res. 2023 Dec 8;16:234. doi: 10.1186/s13048-023-01318-8 (PMC10704810; doi:10.1186/s13048-023-01318-8)
Supplement: Supplementary file 9 — Additional file 9: Supplementary Table 9. [file 13048_2023_1318_MOESM9_ESM.xlsx]

## Sheet: GO_C1
Category	Term	Count	%	PValue	Genes	List Total	Pop Hits	Pop Total	Fold Enrichment	Bonferroni	Benjamini	FDR
GOTERM_MF_DIRECT	GO:1990837~sequence-specific double-stranded DNA binding	110	0.967543	2.61208e-11	102169946, 102189435, 106503493, 102169823, 102175706, 102178020, 102178381, 102177170, 102187776, 102180343, 102169303, 102174980, 102179877, 102176882, 106503934, 102188180, 102185880, 102170788, 106502050, 102185403, 102188516, 102169252, 102172731, 102175448, 102177988, 102189850, 102185491, 102174518, 108634089, 102182388, 108638044, 102180997, 102191382, 102172188, 102190850, 102191268, 102…	5698	175	15148	1.67104	6.18017e-08	6.18018e-08	6.16451e-08
GOTERM_MF_DIRECT	GO:0001228~transcriptional activator activity, RNA polymerase II transcription regulatory region sequence-specific binding	178	1.56566	3.03183e-08	106503097, 100860911, 102188583, 102185072, 102186328, 102169300, 102178020, 102180221, 102180186, 102182006, 102186169, 102185753, 102180343, 102182521, 102179877, 102180738, 102177693, 102170301, 102178661, 102190550, 102175713, 102174500, 102175557, 102174102, 102173411, 102189445, 102170825, 108633766, 102171636, 108638419, 102181683, 102187428, 102182770, 102183745, 102181317, 102180349, 102…	5698	340	15148	1.39179	7.17304e-05	3.58665e-05	3.57755e-05
GOTERM_MF_DIRECT	GO:0000981~RNA polymerase II transcription factor activity, sequence-specific DNA binding	90	0.791626	3.92793e-07	102191831, 102189435, 102170856, 102189594, 102187296, 108638469, 102168854, 100860952, 108637135, 102181279, 102187777, 108636245, 102169303, 102181114, 102182246, 102177412, 102183925, 102177136, 108636284, 102185705, 102173018, 102175836, 106503773, 102178741, 102179753, 102179678, 102168805, 108635905, 102185403, 102189966, 102169414, 102187940, 102186810, 100861257, 108637366, 100860841, 102…	5698	155	15148	1.54363	0.000928916	0.000309783	0.000308997
GOTERM_MF_DIRECT	GO:0042802~identical protein binding	435	3.82619	6.76997e-07	102185871, 102183451, 102171107, 102179075, 102175706, 102183696, 102169389, 102184789, 102184421, 108634223, 102182488, 102181279, 102168290, 106503937, 102187808, 102175714, 106501993, 102172568, 102175710, 102173896, 102179086, 102184673, 102184795, 102183467, 100861577, 102170270, 102171480, 102171362, 102176815, 102172459, 102171484, 102183590, 108634241, 102169244, 102186626, 102181176, 100…	5698	964	15148	1.19962	0.00160049	0.000400444	0.000399428
GOTERM_MF_DIRECT	GO:0000978~RNA polymerase II core promoter proximal region sequence-specific DNA binding	181	1.59205	7.61328e-06	102190545, 106503097, 102179072, 100860911, 102188583, 102185072, 102186328, 108636367, 102169300, 102178020, 102168693, 102180186, 102182887, 102182006, 102186169, 102168854, 102181279, 102180336, 102177693, 102178142, 102173018, 102175836, 102178661, 102174500, 106503773, 102175557, 102174102, 102173411, 102170825, 102173939, 108633766, 108638419, 102182770, 102186219, 102189966, 102188755, 102…	5698	370	15148	1.3005	0.0178518	0.0036026	0.00359347
GOTERM_MF_DIRECT	GO:0000977~RNA polymerase II regulatory region sequence-specific DNA binding	63	0.554138	4.71782e-05	102191831, 108637539, 102184382, 102183850, 102185753, 108636288, 102183335, 102181114, 102182521, 100861042, 102180738, 106502767, 102174260, 102178142, 102170301, 102191089, 102177658, 102189445, 102170826, 102188596, 102189001, 102183022, 102171636, 102181683, 102187428, 102183541, 102189887, 102170590, 102179802, 102172132, 102178355, 102184827, 102190185, 102178316, 102179887, 102179689, 102…	5698	110	15148	1.52258	0.105622	0.0186039	0.0185568
GOTERM_MF_DIRECT	GO:0042803~protein homodimerization activity	231	2.03184	5.89168e-05	100860911, 108633812, 102175270, 102187019, 102168733, 102188226, 102186842, 102176246, 102171591, 102187926, 102175151, 102178781, 102171111, 102178786, 102174862, 102173411, 102171476, 102170705, 102185084, 102175719, 102171912, 102187702, 102180199, 102181288, 100861338, 102170708, 100846984, 102181955, 102182926, 102171485, 102172573, 102189213, 102170954, 108637637, 102178680, 102174082, 102…	5698	500	15148	1.22822	0.130121	0.0199139	0.0198634
GOTERM_MF_DIRECT	GO:0003682~chromatin binding	130	1.14346	0.000167027	102189435, 102184143, 102179072, 102181151, 102184382, 102169389, 102168297, 102169302, 102182246, 102181279, 102179877, 102178546, 102180336, 102171076, 102186719, 102178142, 102175836, 102170301, 102190550, 102174500, 102174589, 102170826, 102188198, 106502050, 102170944, 102189849, 102187428, 102176491, 102179919, 102182651, 102187429, 102186219, 102180349, 102184829, 102178558, 102178430, 102…	5698	266	15148	1.29926	0.326467	0.0493982	0.049273
GOTERM_MF_DIRECT	GO:0001227~transcriptional repressor activity, RNA polymerase II transcription regulatory region sequence-specific binding	99	0.870789	0.000762717	102190545, 106503097, 108636367, 102168693, 102182887, 102183335, 100861042, 102178661, 102191089, 102173411, 102173939, 102190017, 102188596, 102171636, 102169894, 102183617, 102184829, 102176130, 102184827, 102178552, 102182380, 102174518, 102183991, 102189859, 108634247, 102180365, 102188886, 102169644, 102181213, 102176300, 102178202, 102177474, 102191268, 102172069, 102187442, 102190555, 102…	5698	201	15148	1.3094	0.835571	0.192658	0.19217
GOTERM_MF_DIRECT	GO:0005085~guanyl-nucleotide exchange factor activity	95	0.835606	0.000814279	106503770, 102190863, 102188389, 102187410, 102170536, 102189277, 102182162, 102183970, 102187979, 102185433, 102187973, 102183853, 108636442, 102180222, 102187733, 102180338, 102180614, 102182917, 102177375, 102178145, 102178660, 102176802, 102173333, 102170660, 102173015, 106502252, 102171916, 102180150, 102188870, 102171957, 102189969, 108633361, 102183622, 102189645, 102188678, 102176334, 102…	5698	192	15148	1.31539	0.854469	0.192658	0.19217
GOTERM_MF_DIRECT	GO:0005245~voltage-gated calcium channel activity	18	0.158325	0.00097892	102189138, 102189785, 102187163, 102189285, 106503290, 102174727, 102168441, 102187813, 102184834, 108638201, 102189746, 102182785, 102170294, 100861292, 102176592, 102176151, 102173101, 102178206	5698	24	15148	1.99386	0.901457	0.210557	0.210023
GOTERM_MF_DIRECT	GO:0005096~GTPase activator activity	73	0.642097	0.00381455	102184461, 102187378, 102172835, 102182684, 102177370, 102184425, 102184306, 102189317, 102186007, 102186567, 102171470, 102171274, 102170984, 102170622, 102172128, 102174862, 102179953, 102173818, 102186374, 102186575, 102190536, 102190735, 102179482, 102171912, 102174429, 102187505, 102183540, 100861013, 102187027, 102180871, 102176250, 102173502, 102187183, 102178674, 102186584, 102172619, 102…	5698	148	15148	1.31128	0.999882	0.752103	0.750196
GOTERM_MF_DIRECT	GO:0005179~hormone activity	47	0.413405	0.0046278	102168738, 100860838, 108634241, 100860794, 102185538, 100861189, 102181610, 102181974, 102181435, 102178689, 108636085, 102176101, 102191080, 102182514, 100861580, 102173832, 102189251, 102179133, 102170466, 106501993, 102191068, 102179414, 102189885, 102185321, 100860907, 102170965, 100860960, 102180175, 100861299, 108633784, 102182555, 102181465, 100861214, 102180531, 100861230, 102171263, 102…	5698	89	15148	1.40391	0.999983	0.84226	0.840124
GOTERM_MF_DIRECT	GO:0004712~protein serine/threonine/tyrosine kinase activity	108	0.949952	0.00542974	102186443, 102172719, 102188220, 102186040, 102171504, 102171746, 102171625, 102185359, 100860996, 102168732, 102183848, 102176762, 102173496, 102177575, 106501756, 102179510, 102173379, 102183187, 102185084, 100860806, 102172847, 102182530, 102169015, 102184398, 102187547, 108636079, 102183467, 102170270, 102181558, 102182806, 102170159, 102174117, 102173267, 102191751, 102171364, 102187310, 102…	5698	233	15148	1.23226	0.999997	0.917626	0.915299
GOTERM_MF_DIRECT	GO:0019904~protein domain specific binding	68	0.598118	0.0066932	102187497, 102170931, 102171625, 102183696, 102181792, 100861048, 102176565, 102171591, 102178145, 102183409, 102171994, 102174984, 102173016, 102173379, 102173619, 102191227, 102185881, 102170905, 102182570, 102171912, 102188350, 102186338, 102187302, 102179646, 102175442, 102178357, 102177189, 102184827, 102176538, 102172459, 102174833, 102179887, 100860816, 102180083, 102186624, 102183278, 108…	5698	139	15148	1.30055	1	1	0.997886
GOTERM_MF_DIRECT	GO:0003779~actin binding	105	0.923564	0.00769736	106503770, 102188225, 106503491, 102172835, 102185591, 100861321, 102168292, 102171472, 102180617, 102177452, 102178827, 100861283, 102170386, 102172685, 102185000, 102187144, 102171910, 102187781, 102175716, 108637962, 102187669, 102185404, 108638530, 102185402, 102182653, 102179646, 102183859, 102179802, 102176892, 102177189, 102188074, 102170796, 102187260, 102175326, 102174872, 102186583, 102…	5698	228	15148	1.2243	1	1	0.997886
GOTERM_MF_DIRECT	GO:0022857~transmembrane transporter activity	57	0.501363	0.00964771	108633258, 102168419, 102186042, 102181430, 102188747, 102188506, 102175596, 102170261, 102175435, 102171155, 102179479, 102180151, 102191549, 102174949, 102174869, 102189241, 102176490, 102168247, 102187500, 102182411, 102187821, 102174111, 102170555, 102174635, 102172496, 102173104, 108634722, 108633555, 102174519, 102171847, 102186902, 108633279, 108634642, 102184047, 100861027, 102186985, 102…	5698	115	15148	1.31768	1	1	0.997886
GOTERM_MF_DIRECT	GO:0005509~calcium ion binding	256	2.25174	0.011797	102169825, 102188101, 102173527, 102179075, 102191519, 102185758, 102188900, 102169149, 102183698, 102186842, 102169028, 102177697, 102175275, 102170382, 102171592, 102174868, 102171359, 102174624, 102173895, 102171916, 102189202, 102185761, 102168967, 102191747, 102188915, 100860800, 102188911, 102183348, 102186733, 102189447, 102178678, 102191070, 102174198, 102176495, 102186849, 102182926, 102…	5698	606	15148	1.12305	1	1	0.997886
GOTERM_MF_DIRECT	GO:0005516~calmodulin binding	45	0.395813	0.0148042	102189653, 106504042, 102185490, 102174913, 102188560, 102185338, 102176565, 102183825, 102176762, 100861286, 102171472, 106502946, 102191162, 106503735, 106502666, 102172049, 102171533, 102172668, 102190599, 102168229, 102186110, 102185182, 102185084, 102190738, 100860904, 102178372, 108637962, 102186514, 102181145, 100861337, 102168201, 108637646, 102180651, 100860742, 102176256, 102176892, 102…	5698	89	15148	1.34417	1	1	0.997886
GOTERM_MF_DIRECT	GO:0044877~macromolecular complex binding	63	0.554138	0.0170465	102169900, 102168736, 102188463, 102185877, 108637139, 102182523, 102178546, 108636085, 102177774, 102174263, 102176882, 102171274, 102180737, 102179037, 102179312, 102191684, 102175632, 102168405, 102183187, 102189485, 102189849, 102186338, 102169975, 102189887, 102176256, 102187180, 102171007, 102190144, 102172573, 102179688, 102185094, 102171648, 102189010, 102180643, 102184366, 102168873, 102…	5698	132	15148	1.26882	1	1	0.997886
GOTERM_MF_DIRECT	GO:0043425~bHLH transcription factor binding	14	0.123142	0.0205793	102185881, 102172808, 108637538, 108637637, 102174946, 102190607, 102183278, 102168982, 102186147, 102188600, 102168820, 102169293, 102175778, 102170352	5698	21	15148	1.77232	1	1	0.997886
GOTERM_MF_DIRECT	GO:0004879~RNA polymerase II transcription factor activity, ligand-activated sequence-specific DNA binding	20	0.175917	0.0229439	102189445, 102186154, 100860823, 102169808, 100860906, 102188350, 100861309, 102174518, 100860827, 102186338, 102185438, 102189859, 102186219, 102178513, 102177594, 102176075, 100861393, 102190185, 102174500, 102175236	5698	34	15148	1.56381	1	1	0.997886
GOTERM_MF_DIRECT	GO:0008083~growth factor activity	56	0.492568	0.0278002	102181070, 100860957, 102189630, 102180381, 100861208, 102179273, 100860838, 102190507, 102180661, 102169942, 102168896, 102180665, 100860831, 102178704, 102169384, 102171599, 102191364, 102174268, 102186892, 102189962, 102190215, 100860924, 102184232, 108634739, 102171912, 102188790, 100860960, 102169777, 108634211, 102178396, 100861293, 102187183, 102173944, 102172733, 100860814, 102185177, 102…	5698	118	15148	1.26165	1	1	0.997886
GOTERM_MF_DIRECT	GO:0034511~U3 snoRNA binding	6	0.0527751	0.0309697	102177741, 102174253, 102177100, 102171625, 102185877, 102189979	5698	6	15148	2.65848	1	1	0.997886
GOTERM_MF_DIRECT	GO:0001664~G-protein coupled receptor binding	15	0.131938	0.031418	102185175, 102177052, 102170818, 102180585, 100861214, 102182701, 100860770, 102179958, 102175460, 102179133, 102191175, 102173988, 102179981, 102177328, 102176601	5698	24	15148	1.66155	1	1	0.997886
GOTERM_MF_DIRECT	GO:0046983~protein dimerization activity	70	0.615709	0.0340128	102169946, 102183491, 102190504, 108637538, 102170812, 108637738, 102168498, 102186169, 108633532, 100861003, 102168854, 102169302, 100861042, 102173570, 102180336, 108638462, 102180738, 102174260, 102173018, 106502961, 100860908, 102177658, 102170387, 102176203, 102185881, 102187586, 102183022, 102174946, 102183426, 102182526, 102182889, 102169495, 108635819, 102177988, 102176975, 102171168, 102…	5698	153	15148	1.2163	1	1	0.997886
GOTERM_MF_DIRECT	GO:0015280~ligand-gated sodium channel activity	7	0.0615709	0.0365161	102189785, 102186183, 102169542, 102190806, 102190031, 102176638, 100861026	5698	8	15148	2.32617	1	1	0.997886
GOTERM_MF_DIRECT	GO:0042800~histone methyltransferase activity (H3-K4 specific)	9	0.0791626	0.0396251	102183748, 102172009, 102181925, 102172292, 102169037, 102170478, 102168698, 102177810, 102185413	5698	12	15148	1.99386	1	1	0.997886
GOTERM_MF_DIRECT	GO:0003774~motor activity	21	0.184713	0.042079	106503394, 102185591, 102175716, 102178372, 102187978, 102182167, 102178491, 102180345, 102168225, 102181978, 102178047, 102170174, 102177189, 102175493, 102181869, 102170796, 102191562, 102181929, 102174633, 102174872, 102179568	5698	38	15148	1.46916	1	1	0.997886
GOTERM_MF_DIRECT	GO:0001784~phosphotyrosine binding	20	0.175917	0.0454936	102187397, 102189677, 102186140, 102186040, 102171746, 102168551, 102184349, 102188824, 102187209, 102186279, 102188710, 102187711, 102176695, 102177575, 102180601, 102184329, 102170356, 102175206, 102176802, 102177428	5698	36	15148	1.47693	1	1	0.997886
GOTERM_MF_DIRECT	GO:0005543~phospholipid binding	26	0.228692	0.0494783	102189930, 102172616, 100860994, 102184569, 102183970, 102184306, 102178966, 102175275, 102171373, 102176042, 102179037, 102174500, 102191300, 102176072, 102186219, 102183985, 102182455, 102187887, 102169072, 102174670, 102179748, 102184406, 102188074, 102174535, 102170314, 106502794	5698	50	15148	1.38241	1	1	0.997886
GOTERM_MF_DIRECT	GO:0070412~R-SMAD binding	13	0.114346	0.0542437	102188455, 102191605, 102183004, 102184226, 102169389, 102177072, 102170381, 102169293, 102185759, 102174669, 102175778, 102170375, 102171520	5698	21	15148	1.64572	1	1	0.997886
GOTERM_MF_DIRECT	GO:0070888~E-box binding	21	0.184713	0.0565459	102172917, 108637538, 108637637, 102174946, 102188373, 108636457, 108634247, 102189018, 102188600, 102168820, 102189448, 100861395, 108638264, 102177474, 102169495, 102176130, 102171973, 102172821, 102175713, 102173685, 102176975	5698	39	15148	1.43149	1	1	0.997886
GOTERM_MF_DIRECT	GO:0030507~spectrin binding	12	0.10555	0.0580383	106504042, 102175716, 102179143, 106502666, 102188074, 106502887, 102172833, 102169870, 102176119, 102191302, 102186831, 108633200	5698	19	15148	1.67904	1	1	0.997886
GOTERM_MF_DIRECT	GO:0004252~serine-type endopeptidase activity	81	0.712464	0.0583012	102184666, 102169785, 108638467, 108633178, 108638461, 102174540, 102174387, 102175078, 102173292, 102176085, 102174944, 102174148, 106504026, 102177855, 102190776, 102185320, 102187300, 102185761, 102187460, 102179086, 102188196, 102191749, 102188835, 102180351, 102174794, 102178999, 102174670, 102179409, 102177461, 102171568, 102177744, 102179128, 102170638, 102168758, 102185651, 102191416, 102…	5698	184	15148	1.17031	1	1	0.997886
GOTERM_MF_DIRECT	GO:0031490~chromatin DNA binding	23	0.202305	0.0629532	102191766, 102182380, 102188324, 102190017, 102186154, 102184297, 108637637, 102188350, 102186338, 102171819, 102189238, 102178225, 100861395, 102169293, 102179802, 106501749, 102174096, 102173700, 102178552, 102173685, 102190101, 102174102, 102173950	5698	44	15148	1.38966	1	1	0.997886
GOTERM_MF_DIRECT	GO:0004707~MAP kinase activity	10	0.0879585	0.0658372	100861087, 102170408, 102180534, 102172719, 102180926, 102186040, 102183251, 102188824, 100860996, 102184510	5698	15	15148	1.77232	1	1	0.997886
GOTERM_MF_DIRECT	GO:0042162~telomeric DNA binding	9	0.0791626	0.0695689	102186132, 102178278, 102182833, 102180253, 102189849, 102185877, 102174524, 102179312, 102168457	5698	13	15148	1.84048	1	1	0.997886
GOTERM_MF_DIRECT	GO:0016779~nucleotidyltransferase activity	9	0.0791626	0.0695689	102185473, 102189424, 106503150, 102178496, 108633328, 102180808, 102169222, 102183514, 102187733	5698	13	15148	1.84048	1	1	0.997886
GOTERM_MF_DIRECT	GO:0005227~calcium activated cation channel activity	9	0.0791626	0.0695689	102170294, 102169109, 100861329, 102175065, 102175193, 102188404, 102176305, 102182435, 102188963	5698	13	15148	1.84048	1	1	0.997886
GOTERM_MF_DIRECT	GO:0050786~RAGE receptor binding	5	0.0439792	0.0699016	102188551, 102190087, 102169524, 102168876, 102169149	5698	5	15148	2.65848	1	1	0.997886
GOTERM_MF_DIRECT	GO:0005290~L-histidine transmembrane transporter activity	5	0.0439792	0.0699016	102174074, 102178807, 102176989, 102187237, 102177558	5698	5	15148	2.65848	1	1	0.997886
GOTERM_MF_DIRECT	GO:0005272~sodium channel activity	8	0.0703668	0.0728142	102175485, 102169508, 102171060, 102175193, 102175646, 102181445, 102171168, 102176940	5698	11	15148	1.93344	1	1	0.997886
GOTERM_MF_DIRECT	GO:0004035~alkaline phosphatase activity	6	0.0527751	0.0748819	102190876, 108633351, 102190919, 102190650, 102189447, 102179897	5698	7	15148	2.27869	1	1	0.997886
GOTERM_MF_DIRECT	GO:0008409~5'-3' exonuclease activity	6	0.0527751	0.0748819	102168405, 102184452, 102182173, 106502290, 102185510, 102177963	5698	7	15148	2.27869	1	1	0.997886
GOTERM_MF_DIRECT	GO:0008190~eukaryotic initiation factor 4E binding	6	0.0527751	0.0748819	102176233, 100861353, 102183267, 106502334, 102176538, 100861234	5698	7	15148	2.27869	1	1	0.997886
GOTERM_MF_DIRECT	GO:0001972~retinoic acid binding	7	0.0615709	0.0749799	102173891, 102175265, 102188350, 102182914, 102174348, 106503632, 108634544	5698	9	15148	2.0677	1	1	0.997886
GOTERM_MF_DIRECT	GO:0050321~tau-protein kinase activity	7	0.0615709	0.0749799	102178314, 102178248, 102178478, 102185771, 102172847, 102178709, 102187523	5698	9	15148	2.0677	1	1	0.997886
GOTERM_MF_DIRECT	GO:0019900~kinase binding	29	0.25508	0.0776381	102190800, 102172917, 102187099, 108637430, 102174243, 102172767, 102177713, 102170781, 102176601, 102177337, 102178326, 102169719, 102189384, 102169157, 102184952, 102187428, 102175061, 102187803, 102168543, 102171480, 102174450, 102171325, 102173988, 102173685, 102171485, 102188070, 102173541, 102177646, 102172377	5698	59	15148	1.30671	1	1	0.997886
GOTERM_MF_DIRECT	GO:0004623~phospholipase A2 activity	13	0.114346	0.079459	102187595, 102188141, 102168220, 102182111, 102169892, 102189517, 102168673, 108633234, 102169567, 102176672, 102170280, 102170564, 102170006	5698	22	15148	1.57092	1	1	0.997886
GOTERM_MF_DIRECT	GO:0030215~semaphorin receptor binding	12	0.10555	0.0861878	102186908, 102175861, 102170184, 102173041, 102179661, 102171324, 102179156, 102188857, 102179434, 102173510, 102177028, 102174785	5698	20	15148	1.59509	1	1	0.997886
GOTERM_MF_DIRECT	GO:0004521~endoribonuclease activity	11	0.0967543	0.0935104	102187298, 102172121, 102168281, 102173901, 102168491, 102179592, 102184655, 102180253, 102173845, 102184398, 102190376	5698	18	15148	1.62462	1	1	0.997886
GOTERM_MF_DIRECT	GO:0051015~actin filament binding	54	0.474976	0.094603	102187497, 102188225, 102188740, 102179075, 102177371, 102187978, 102183850, 102184349, 102180345, 102180225, 102176002, 102181869, 106502887, 102170587, 102172767, 106503410, 102176601, 106501990, 102171910, 102170108, 102182970, 108634335, 102184156, 102168763, 108633200, 102179802, 102174198, 102173060, 102182728, 102180869, 102173822, 102177823, 102171880, 102179568, 106504042, 102187630, 102…	5698	121	15148	1.18643	1	1	0.997886
GOTERM_CC_DIRECT	GO:0005887~integral component of plasma membrane	192	1.6888	2.61652e-07	102186441, 102188104, 102189399, 100860878, 102189554, 102170931, 102172317, 108637617, 102169542, 102184424, 102181156, 102182486, 102187539, 102189834, 102183338, 102183579, 102168337, 108634223, 102183848, 102174981, 102179517, 102177174, 102175151, 102190031, 102186160, 106503654, 102174346, 102191004, 102190659, 100860806, 102168287, 102181288, 102177060, 108637965, 102187547, 102187822, 102…	6306	373	16416	1.34	0.000303993	0.00030404	0.000303778
GOTERM_CC_DIRECT	GO:0043231~intracellular membrane-bounded organelle	64	0.562934	1.35569e-05	100860758, 100861208, 102188100, 102186120, 102185031, 102183696, 102169587, 102183772, 102181473, 100860831, 102182324, 102175596, 100861087, 102180534, 102171477, 102171313, 102170983, 102188182, 102174984, 102190510, 102189962, 100860848, 102191547, 102191825, 102173857, 102171757, 102188397, 102185801, 102184515, 102169018, 100861137, 102179646, 102183935, 102176892, 102180706, 102176815, 102…	6306	107	16416	1.55708	0.0156298	0.00787657	0.00786979
GOTERM_CC_DIRECT	GO:0005654~nucleoplasm	849	7.46768	2.1581e-05	102185877, 102184547, 102180186, 100861322, 100861323, 102181278, 102184786, 102182367, 102181279, 102174980, 102174988, 102175836, 102172327, 106501873, 102173411, 102171476, 102185403, 102181287, 102184316, 102180196, 100861338, 102181043, 102168288, 100861576, 102168281, 102191072, 102185639, 102186729, 102171007, 102171243, 102171001, 102174993, 102176938, 102182388, 102183477, 102183475, 102…	6306	1989	16416	1.11118	0.0247656	0.00835904	0.00835185
GOTERM_CC_DIRECT	GO:0009986~cell surface	147	1.29299	0.000356809	102189399, 108634226, 102170931, 108637617, 102187813, 102178141, 102184666, 102168576, 102183457, 102177454, 102175151, 102191364, 102176647, 106503654, 102176007, 102172166, 102173651, 102191004, 102180190, 102171756, 102190818, 102183463, 100860800, 102181324, 102183219, 100861291, 102187819, 100861293, 102178791, 102180509, 102178796, 102191356, 102170711, 102172218, 102174913, 102186186, 102…	6306	304	16416	1.2588	0.339452	0.103653	0.103564
GOTERM_CC_DIRECT	GO:0005829~cytosol	984	8.65511	0.000941494	102187813, 102169389, 102184547, 102188901, 102180186, 102183699, 102182367, 102168292, 102174988, 102172327, 102172568, 102171233, 102188914, 102181287, 102168286, 102180199, 100861337, 102185404, 102184316, 102180196, 102181285, 100861576, 102170151, 102168281, 102172571, 102186728, 102185639, 102186729, 106502976, 102171485, 102171001, 102170156, 102181053, 100861347, 102187835, 102184322, 100…	6306	2380	16416	1.0763	0.665304	0.218803	0.218615
GOTERM_CC_DIRECT	GO:0032993~protein-DNA complex	22	0.193509	0.00164681	102190248, 100860901, 102171625, 108637407, 102186328, 102185877, 102169983, 102183475, 102189528, 102183386, 102180076, 102180349, 102172033, 102176130, 102170036, 102185070, 102187193, 102171671, 102175557, 102191684, 102174102, 102171520	6306	32	16416	1.78972	0.852683	0.305426	0.305163
GOTERM_CC_DIRECT	GO:0005667~transcription factor complex	65	0.57173	0.00183992	102190545, 102189435, 102171829, 108637538, 102171306, 102171625, 102187055, 102189594, 108638469, 102169389, 100860751, 102185438, 100861366, 108634343, 102182521, 102180336, 102170301, 102191684, 102176203, 106504031, 102187586, 102186491, 102186416, 102169414, 100860841, 102178513, 102179921, 102174354, 102169293, 102174791, 102185957, 102169495, 102177064, 102170036, 106502775, 102170237, 102…	6306	124	16416	1.3646	0.88234	0.305426	0.305163
GOTERM_CC_DIRECT	GO:0005615~extracellular space	286	2.51561	0.0024294	102169825, 100860913, 100861208, 102168738, 102186282, 100860916, 102184666, 102184424, 102185756, 102181154, 102181038, 102187379, 102183699, 102189558, 102176244, 102178301, 102183207, 102179519, 106501993, 102172442, 102176007, 102171111, 100860924, 102174506, 102180072, 100860805, 102182135, 102168288, 108636634, 100860800, 108633243, 102178679, 106503824, 102187819, 106503396, 100860814, 102…	6306	651	16416	1.14366	0.940774	0.352871	0.352567
GOTERM_CC_DIRECT	GO:0002080~acrosomal membrane	11	0.0967543	0.005532	100861394, 102172770, 102173891, 100860900, 102176581, 102191828, 102177716, 102185305, 100860892, 102188359, 102168941	6306	13	16416	2.20274	0.998413	0.714243	0.713628
GOTERM_CC_DIRECT	GO:0005576~extracellular region	316	2.77949	0.00645764	102169825, 102182483, 102179196, 102169942, 102182127, 102188900, 102184664, 102182247, 108636085, 102178789, 102191080, 102169384, 102174504, 102179198, 102171599, 102190671, 102174624, 100860924, 102179086, 100860805, 100861338, 102185527, 108634211, 102169259, 100861214, 100862660, 102183219, 102172571, 102179409, 106501767, 102177904, 102190780, 102191199, 102171366, 100860935, 100860814, 102…	6306	735	16416	1.11921	0.999462	0.750377	0.749732
GOTERM_CC_DIRECT	GO:0005765~lysosomal membrane	60	0.527751	0.0083258	102168338, 102189356, 102189793, 108635156, 102183179, 102187977, 102189799, 102185754, 102177016, 102171470, 102174346, 102176448, 102176326, 102189489, 102171757, 102189285, 102187702, 108637800, 102187028, 102181368, 102184673, 102182528, 102181516, 102191190, 102181759, 102176978, 102171484, 102175005, 102187595, 102184242, 102188244, 102189213, 100861347, 102169562, 100861025, 102188963, 102…	6306	119	16416	1.31256	0.99994	0.81479	0.814089
GOTERM_CC_DIRECT	GO:0008305~integrin complex	17	0.149529	0.00841436	102180190, 102173608, 102183451, 102169839, 102187813, 102181695, 102185415, 102179809, 102180368, 102185499, 100861185, 102180910, 102176587, 102171074, 102174073, 102172115, 102191175	6306	25	16416	1.7702	0.999946	0.81479	0.814089
GOTERM_CC_DIRECT	GO:0005794~Golgi apparatus	231	2.03184	0.0127899	100860913, 102188464, 102170931, 102171107, 102186040, 102170934, 102185513, 102169389, 102180862, 102176246, 102176487, 102185629, 102171236, 102174624, 102178783, 102191503, 102170824, 100860805, 102181287, 102181721, 102182923, 102191190, 102172571, 102174878, 102171249, 102176932, 102168834, 100860935, 102189212, 102190329, 102176938, 102176260, 102181056, 108638601, 102169005, 102185413, 102…	6306	533	16416	1.12823	1	1	1
GOTERM_CC_DIRECT	GO:0031225~anchored component of membrane	19	0.167121	0.0134188	102183172, 102190876, 108634023, 108633351, 102168872, 102169975, 102190919, 102189447, 102183457, 102182747, 102178126, 102180149, 102178626, 102173513, 102170246, 102190650, 106502352, 102179897, 102177853	6306	30	16416	1.64872	1	1	1
GOTERM_CC_DIRECT	GO:0005911~cell-cell junction	45	0.395813	0.0137359	102168438, 102189776, 102173428, 102183251, 102186120, 102182282, 102184468, 108638601, 102179808, 102182762, 102183255, 102182980, 102188327, 102176587, 102179537, 102174145, 100861386, 102174768, 102172668, 102178783, 102176601, 102172166, 102174520, 102173950, 102178403, 102186231, 102190711, 102187960, 100860904, 102183685, 102180199, 102170928, 102188710, 102182554, 102170270, 102183518, 102…	6306	87	16416	1.3465	1	1	1
GOTERM_CC_DIRECT	GO:0005891~voltage-gated calcium channel complex	13	0.114346	0.0141995	102189138, 102187163, 106503290, 102174727, 102168441, 102185724, 102184834, 102189746, 100861292, 102176592, 102176151, 102179168, 102178206	6306	18	16416	1.88011	1	1	1
GOTERM_CC_DIRECT	GO:0005737~cytoplasm	796	7.0015	0.018824	102179195, 102169389, 102185877, 102184789, 102187815, 102183452, 100861322, 102169149, 102171472, 102186719, 102174504, 102173656, 102171479, 102174744, 102174500, 102174984, 102174982, 102172564, 102185881, 102172328, 108637962, 102181288, 102181043, 108633361, 102185400, 102186733, 102170151, 102169132, 102187819, 102186729, 102188906, 102170399, 102174516, 102170159, 102171006, 102186981, 102…	6306	1959	16416	1.05777	1	1	1
GOTERM_CC_DIRECT	GO:0042627~chylomicron	8	0.0703668	0.019617	102171373, 102183707, 102170314, 102190474, 102191574, 102179303, 102183985, 102170046	6306	9	16416	2.31399	1	1	1
GOTERM_CC_DIRECT	GO:0005762~mitochondrial large ribosomal subunit	25	0.219896	0.0214904	102178024, 102177154, 102175734, 102174645, 106502004, 102175898, 102176501, 102170167, 102189742, 102188871, 102189421, 102176709, 102190638, 102183388, 102169854, 102170909, 102184707, 102175441, 102180843, 102182905, 102178451, 102172754, 102170654, 102189061, 102177865	6306	44	16416	1.47911	1	1	1
GOTERM_CC_DIRECT	GO:0045171~intercellular bridge	34	0.299059	0.0218367	102190469, 102173808, 102191536, 102188344, 102189474, 102187438, 102183850, 102183475, 102183992, 100861223, 102173032, 102173876, 102176229, 102176448, 102176228, 102178522, 102171476, 102177435, 106503440, 102185000, 102182570, 102182173, 102185284, 102191829, 102186316, 102182178, 102187902, 102177983, 100861054, 102182548, 102177068, 102170377, 102177825, 102172573	6306	64	16416	1.38297	1	1	1
GOTERM_CC_DIRECT	GO:0043197~dendritic spine	24	0.2111	0.0228202	102190985, 102190711, 102171839, 102185490, 106503193, 102185084, 102177140, 102178482, 102187669, 102176072, 102187803, 102169206, 102169899, 102186007, 102181801, 102181359, 102188906, 102176638, 102173438, 102170578, 102176007, 102191300, 102172771, 102173379	6306	42	16416	1.48756	1	1	1
GOTERM_CC_DIRECT	GO:0005770~late endosome	40	0.351834	0.0242044	102184065, 108635536, 100860818, 102186040, 102174913, 102175390, 102183179, 102188824, 102181011, 100861321, 102187973, 102181873, 102173330, 102173110, 102169484, 102191183, 102187709, 102173435, 102186061, 102186280, 102175557, 102172584, 102171376, 102170209, 102191449, 102169278, 102182893, 100860744, 102183524, 102186579, 102180772, 102182015, 102182749, 102173601, 102171984, 102171544, 102…	6306	78	16416	1.33499	1	1	1
GOTERM_CC_DIRECT	GO:0005783~endoplasmic reticulum	187	1.64482	0.0333826	102188464, 102189554, 102170931, 102171109, 102182003, 102184941, 102183179, 102180221, 102188868, 102189716, 102185477, 102182127, 102183457, 102186600, 102174222, 102183329, 102176244, 102179519, 102181946, 102171236, 102191484, 102174348, 102190550, 102171596, 102168603, 102169814, 102191749, 102178394, 102178709, 102186698, 102183624, 102169899, 102188757, 102180502, 102171367, 102176538, 102…	6306	435	16416	1.11909	1	1	1
GOTERM_CC_DIRECT	GO:0005871~kinesin complex	6	0.0527751	0.0340709	106503385, 102174462, 102173138, 102187797, 102190277, 102172378	6306	6	16416	2.60324	1	1	1
GOTERM_CC_DIRECT	GO:0031966~mitochondrial membrane	27	0.237488	0.0347586	102181072, 102183932, 102182127, 102183535, 102184741, 108636240, 102168293, 102183809, 102191504, 102171536, 102168606, 102170668, 102180353, 102170908, 102189447, 102184455, 102183600, 102172174, 102174793, 102186969, 102181759, 102176914, 102172159, 102179322, 102172870, 102172674, 102176874	6306	50	16416	1.40575	1	1	1
GOTERM_CC_DIRECT	GO:0031012~extracellular matrix	37	0.325446	0.037193	102188960, 102184364, 108637658, 102183077, 102186987, 102185477, 102182842, 102169643, 102185974, 102175498, 102173210, 102175176, 102173594, 102179616, 102175692, 106502966, 102170201, 102179770, 102170620, 102173757, 102191364, 102173433, 102190731, 102184174, 102170326, 102168287, 102181066, 108635600, 102168469, 102189447, 102189700, 102177683, 102176054, 102187819, 102171665, 102170314, 102…	6306	73	16416	1.31945	1	1	1
GOTERM_CC_DIRECT	GO:0012505~endomembrane system	14	0.123142	0.0395802	102185098, 102179081, 102168659, 102183003, 102176972, 102178569, 102176331, 102176163, 102170104, 106503941, 102172128, 102174434, 102174984, 102174751	6306	22	16416	1.6566	1	1	1
GOTERM_CC_DIRECT	GO:0032991~macromolecular complex	124	1.09069	0.0405624	106503770, 102188464, 102188740, 102189397, 102172317, 102188188, 102176519, 102180980, 102183452, 102181676, 102185510, 102180984, 102180699, 102178704, 102185509, 102186160, 102191486, 102174346, 102173016, 102178787, 102171630, 102169538, 102171912, 102188351, 102185404, 102180196, 102190818, 102184795, 102168963, 102178832, 102174595, 102176256, 102184827, 102179363, 102191111, 102176779, 102…	6306	282	16416	1.14468	1	1	1
GOTERM_CC_DIRECT	GO:0000779~condensed chromosome, centromeric region	7	0.0615709	0.0406081	102170061, 102178558, 102188550, 102176682, 108637430, 102185214, 102185720	6306	8	16416	2.27783	1	1	1
GOTERM_CC_DIRECT	GO:0071944~cell periphery	13	0.114346	0.0413065	102172648, 102181148, 102169403, 100846984, 102189700, 102175795, 102178569, 102178279, 102186705, 102177275, 102180604, 102177435, 102178106	6306	20	16416	1.6921	1	1	1
GOTERM_CC_DIRECT	GO:0015630~microtubule cytoskeleton	28	0.246284	0.0425191	102189698, 102190469, 106502162, 102191536, 102183850, 102168772, 102184841, 102173032, 102177136, 102174200, 102174042, 102176163, 102177295, 102185509, 102191485, 102176229, 102172128, 106503440, 102191226, 102171657, 102182570, 102179919, 102168520, 102181325, 102176892, 102173524, 102170375, 102170354	6306	53	16416	1.37529	1	1	1
GOTERM_CC_DIRECT	GO:0090575~RNA polymerase II transcription factor complex	35	0.307855	0.042574	102191831, 102191459, 102173846, 102182388, 102180221, 102185812, 102183991, 100861124, 102186169, 102169302, 102185753, 108637532, 102177594, 108637271, 102172547, 102187193, 102171671, 102174500, 102175236, 102189445, 102186154, 102172808, 100860906, 102188350, 102174946, 102187428, 102180571, 102186219, 102168820, 102181317, 102180349, 102174211, 102185738, 102172212, 102179887	6306	69	16416	1.32048	1	1	1
GOTERM_CC_DIRECT	GO:0097730~non-motile cilium	11	0.0967543	0.0441405	102186331, 102177355, 102187201, 106502151, 106502976, 102175646, 102188646, 102178521, 102181234, 102179457, 102168337	6306	16	16416	1.78972	1	1	1
GOTERM_CC_DIRECT	GO:0099055~integral component of postsynaptic membrane	11	0.0967543	0.0441405	102187695, 102186352, 102181359, 102177355, 102172494, 102170586, 102179992, 102186912, 102170561, 102187843, 102183467	6306	16	16416	1.78972	1	1	1
GOTERM_CC_DIRECT	GO:0031941~filamentous actin	10	0.0879585	0.044941	102178569, 102171910, 102185591, 102189583, 102178372, 102180274, 102181929, 102182743, 102174872, 102177435	6306	14	16416	1.85945	1	1	1
GOTERM_CC_DIRECT	GO:0005768~endosome	52	0.457384	0.0450606	102190984, 102188464, 102189399, 102169901, 102179193, 102183014, 102180224, 102168577, 102187899, 102186006, 102176043, 102190593, 102176725, 102174547, 102176007, 102184350, 102180190, 102186696, 102171917, 102179163, 102169575, 102191828, 102189723, 102185721, 102185639, 102170356, 102174434, 102175568, 102182060, 100860819, 102171404, 102184883, 102183428, 102175139, 102171376, 102171058, 102…	6306	109	16416	1.24191	1	1	1
GOTERM_CC_DIRECT	GO:0098978~glutamatergic synapse	86	0.756443	0.0485918	102187695, 102190985, 108634226, 102169824, 102168298, 102187815, 108633372, 100861321, 102189515, 102181952, 102186007, 108634223, 102181873, 102179316, 102177097, 102170223, 102179992, 102172403, 102176007, 102174468, 102173497, 102179831, 102177732, 102174785, 102191227, 102171839, 102185002, 102189048, 102190659, 102180591, 102181161, 102187669, 102191828, 102186774, 102183467, 102181878, 102…	6306	191	16416	1.17214	1	1	1
GOTERM_CC_DIRECT	GO:0055038~recycling endosome membrane	20	0.175917	0.0560402	102187322, 102180083, 108633812, 102189066, 102181011, 102169057, 102187336, 102180772, 102173032, 102174651, 102178966, 102175088, 102173220, 102191182, 102169361, 102173438, 102175645, 102175139, 102171694, 102179446	6306	36	16416	1.44624	1	1	1
GOTERM_CC_DIRECT	GO:0016324~apical plasma membrane	81	0.712464	0.0633491	102186441, 102189993, 102189554, 102175509, 102185359, 102188747, 102189834, 102182645, 102168576, 102174981, 102181747, 102181989, 102173295, 102178188, 102188619, 102190031, 102170104, 102186280, 102174547, 102183460, 102190738, 102187945, 102187989, 102189408, 102181489, 102187984, 102179569, 102176178, 102171362, 102174074, 102174635, 102174434, 102175645, 102175444, 102179446, 102172212, 102…	6306	181	16416	1.16498	1	1	1
GOTERM_CC_DIRECT	GO:0044291~cell-cell contact zone	12	0.10555	0.0671556	102182429, 102186231, 102184188, 108634616, 102180083, 102182705, 102189583, 102191828, 102189619, 102172535, 102172301, 102169434	6306	19	16416	1.64415	1	1	1
GOTERM_CC_DIRECT	GO:0042383~sarcolemma	25	0.219896	0.0675289	102188740, 102185490, 106503290, 102184468, 102182762, 102169305, 102169643, 102180712, 102175491, 102178206, 102170485, 102178403, 106502252, 102187169, 102187263, 100750232, 102183003, 102169434, 102183369, 106501743, 102179168, 102174874, 102174655, 102191378, 106504013	6306	48	16416	1.35585	1	1	1
GOTERM_CC_DIRECT	GO:0030139~endocytic vesicle	17	0.149529	0.0691156	106503396, 102189399, 102171912, 102189066, 102191828, 102187119, 102168201, 102183756, 102184883, 100860744, 102186433, 102182649, 102182917, 102190593, 102174434, 102175645, 102172212	6306	30	16416	1.47517	1	1	1
GOTERM_CC_DIRECT	GO:0016323~basolateral plasma membrane	60	0.527751	0.0708318	102189993, 100860878, 102170931, 102172317, 102181156, 102185757, 102188747, 102189832, 102174981, 102182956, 102181989, 102180699, 102174868, 102174986, 102172767, 102176007, 102172166, 102191828, 100860761, 102184750, 102186579, 102176452, 102175645, 102177468, 102171047, 102171168, 102187078, 102174519, 106504040, 102189010, 102174913, 102181892, 100860811, 102187237, 102185499, 102171809, 102…	6306	131	16416	1.19232	1	1	1
GOTERM_CC_DIRECT	GO:0031982~vesicle	20	0.175917	0.0747702	102186465, 102191317, 102186420, 102188141, 102190738, 100860904, 108634023, 102186228, 102169697, 102181296, 108634196, 108634240, 102177302, 102178987, 102181739, 102175756, 102171017, 102174800, 102172783, 102171047	6306	37	16416	1.40715	1	1	1
GOTERM_CC_DIRECT	GO:0098839~postsynaptic density membrane	5	0.0439792	0.075341	100861292, 102174172, 102170586, 102187803, 102185566	6306	5	16416	2.60324	1	1	1
GOTERM_CC_DIRECT	GO:0045202~synapse	68	0.598118	0.0772426	102190269, 102189753, 102168811, 102168539, 102185310, 106503293, 102188220, 100860994, 102168654, 102168337, 102180217, 102177334, 102181747, 102171990, 102186331, 102171916, 102172328, 108637800, 102181886, 100860765, 102189689, 102180547, 102178357, 102179849, 102170510, 102191397, 102179168, 102178674, 102184320, 102190849, 102169564, 102169403, 102168598, 102182147, 102182979, 102176587, 102…	6306	151	16416	1.17232	1	1	1
GOTERM_CC_DIRECT	GO:0034361~very-low-density lipoprotein particle	9	0.0791626	0.0782005	102171373, 102183707, 102171704, 102184569, 102170314, 102190474, 102179303, 102183985, 102170046	6306	13	16416	1.80224	1	1	1
GOTERM_CC_DIRECT	GO:0032587~ruffle membrane	26	0.228692	0.079566	106503770, 102172835, 102188141, 100860994, 102187813, 102183970, 102187979, 102188327, 102176587, 102182834, 102177575, 102170587, 102179298, 102173713, 102172767, 102173438, 102170781, 102191300, 102177657, 102187960, 102178295, 102180276, 102180199, 102189887, 102169072, 102181739	6306	51	16416	1.32714	1	1	1
GOTERM_CC_DIRECT	GO:0005811~lipid particle	29	0.25508	0.0800465	102187398, 102179270, 102186882, 102189716, 100861244, 100861245, 102169567, 102178127, 100861240, 102181505, 102178922, 100861060, 102173170, 102189195, 102179132, 102190690, 102170325, 102168605, 102168869, 102174409, 102183447, 102182726, 102186907, 102178357, 102184406, 102178739, 102191293, 102174038, 102170750	6306	58	16416	1.30162	1	1	1
GOTERM_CC_DIRECT	GO:0005614~interstitial matrix	8	0.0703668	0.0810331	102185718, 102179198, 102169597, 102168770, 102170698, 102188614, 102173884, 102177864	6306	11	16416	1.89326	1	1	1
GOTERM_CC_DIRECT	GO:0005861~troponin complex	6	0.0527751	0.0816107	102185261, 100861283, 102181232, 100861317, 100860775, 100861247	6306	7	16416	2.23134	1	1	1
GOTERM_CC_DIRECT	GO:0005697~telomerase holoenzyme complex	7	0.0615709	0.0825903	102169900, 102178847, 102184270, 102179001, 102179312, 102179567, 102173400	6306	9	16416	2.02474	1	1	1
GOTERM_CC_DIRECT	GO:0031965~nuclear membrane	57	0.501363	0.0842008	102187972, 102171306, 102190703, 102185438, 102185955, 100861400, 102168413, 100861042, 102184818, 102180777, 106503937, 102172161, 102178264, 106502686, 102177857, 102191442, 102171756, 102176491, 102181043, 102183822, 102183745, 102169975, 102188799, 102181911, 102171480, 102182726, 102177741, 102174791, 100861254, 102176898, 102172179, 102177468, 102191810, 102189377, 100860977, 102189013, 102…	6306	125	16416	1.18708	1	1	1
GOTERM_CC_DIRECT	GO:0032588~trans-Golgi network membrane	14	0.123142	0.0855294	108633812, 102188538, 102184547, 102169057, 102183524, 102178966, 102177674, 102191070, 102173220, 102185946, 102176054, 102191182, 102180329, 102175139	6306	24	16416	1.51855	1	1	1
GOTERM_CC_DIRECT	GO:0014069~postsynaptic density	39	0.343038	0.0867695	102189698, 102186583, 102190985, 102184966, 102184123, 102182820, 102186007, 102176803, 102190872, 102172301, 102175334, 102174862, 102191227, 106503162, 102185002, 102170667, 102177140, 102169870, 100860783, 102180255, 102189887, 102189602, 102175861, 102179505, 102170096, 102181359, 102184208, 102182928, 102174052, 106501788, 102178739, 102176074, 102172710, 102170578, 102172771, 102190168, 102…	6306	82	16416	1.23812	1	1	1
GOTERM_CC_DIRECT	GO:0030176~integral component of endoplasmic reticulum membrane	32	0.281467	0.0966629	102172839, 102189695, 102172515, 102189253, 102177509, 102182047, 100860953, 102182862, 102181328, 102175814, 102191087, 102170325, 102179676, 102173497, 102171058, 102168888, 102188574, 102174409, 102187120, 102169971, 102187702, 100861354, 102188414, 102180789, 102169491, 102182569, 102184406, 102191194, 102182749, 102180829, 102179863, 102172532	6306	66	16416	1.26217	1	1	1
GOTERM_CC_DIRECT	GO:0001669~acrosomal vesicle	26	0.228692	0.098973	102184342, 102191416, 102185536, 102178283, 102168333, 102189515, 102169281, 102173379, 108634239, 102188196, 102188175, 102169575, 102186899, 102176050, 102186956, 102181345, 102171480, 102173980, 102180149, 102172230, 102188927, 102168383, 102190381, 106503207, 102175669, 102172573	6306	52	16416	1.30162	1	1	1
GOTERM_BP_DIRECT	GO:0060041~retina development in camera-type eye	27	0.237488	7.03964e-05	102189314, 102188324, 102185310, 102183372, 108638601, 102186824, 102182961, 102176345, 102184914, 102186280, 102179852, 102174344, 102168603, 102168525, 102186231, 102190899, 102169531, 102189902, 102183881, 102183008, 102185664, 100846984, 102186907, 102178179, 106502976, 102177064, 102170054	5434	36	13743	1.89681	0.402059	0.514175	0.514175
GOTERM_BP_DIRECT	GO:0001934~positive regulation of protein phosphorylation	45	0.395813	0.000263481	102189698, 102184143, 102190426, 102180480, 102188220, 102179195, 102186108, 102186624, 102185736, 102169942, 102189417, 102170184, 102180777, 102184835, 100860770, 102173093, 102173438, 102191364, 102175933, 102178407, 102172562, 102191102, 102178787, 102187802, 102175061, 100861013, 102183624, 102186433, 102168469, 102169434, 102180014, 102180348, 102173220, 106503626, 102181418, 102182749, 106…	5434	73	13743	1.55902	0.854122	0.947571	0.947571
GOTERM_BP_DIRECT	GO:0043410~positive regulation of MAPK cascade	47	0.413405	0.0003892	102189399, 102172933, 102173967, 102180041, 102169409, 102191518, 102186108, 102184646, 108634241, 100860794, 100861189, 100860811, 102181435, 102185852, 102184367, 102174541, 106503637, 102176581, 102171477, 102176825, 102174426, 102179850, 102179510, 102170781, 102174323, 108638619, 102187960, 102169956, 102185002, 102188790, 108636136, 102189905, 102185327, 102181288, 102184377, 100861576, 102…	5434	78	13743	1.52393	0.941788	0.947571	0.947571
GOTERM_BP_DIRECT	GO:0045944~positive regulation of transcription from RNA polymerase II promoter	225	1.97907	0.0010955	102190545, 102187378, 102179072, 102181151, 102170931, 102189430, 102168297, 102183452, 102181154, 102187379, 102183457, 102182246, 102181279, 102171591, 102174064, 102186719, 102174504, 102175836, 102171111, 102173774, 102170826, 102185880, 106502050, 102188350, 102187940, 100861576, 102168963, 102187942, 102169252, 102169495, 102176130, 102172212, 102189698, 102188488, 100860814, 102190328, 100…	5434	483	13743	1.17814	0.999667	1	1
GOTERM_BP_DIRECT	GO:0007218~neuropeptide signaling pathway	23	0.202305	0.00146052	102187201, 108638238, 102169587, 108638006, 102169345, 102169675, 100860871, 100860866, 102187336, 102181974, 102184377, 102183996, 102181377, 102183738, 102174351, 102182514, 102174096, 102172953, 102191397, 102174668, 102184909, 102174787, 102173972	5434	33	13743	1.76269	0.999977	1	1
GOTERM_BP_DIRECT	GO:0045599~negative regulation of fat cell differentiation	25	0.219896	0.00159373	102181151, 102189430, 102184049, 102179437, 102181887, 102173018, 102172821, 102191364, 102175557, 106503750, 102172069, 106504031, 102189367, 102190938, 102181066, 102180950, 102180014, 102169259, 102169293, 100861032, 102183937, 106503326, 102190064, 102170375, 102173125	5434	37	13743	1.70884	0.999991	1	1
GOTERM_BP_DIRECT	GO:0031175~neuron projection development	30	0.263875	0.00271477	102184067, 106504042, 102173989, 102169905, 102181011, 102181792, 102170917, 102168873, 102186249, 102183457, 102178569, 102176520, 108637271, 106502666, 102191300, 102178128, 102172047, 102168520, 102168686, 102187789, 102179748, 100861291, 102175460, 102173700, 102172833, 102177825, 102172953, 102170314, 102175502, 102176874	5434	48	13743	1.58067	1	1	1
GOTERM_BP_DIRECT	GO:1900745~positive regulation of p38MAPK cascade	16	0.140734	0.00308392	102173637, 102186416, 102185559, 102183684, 102176291, 100860794, 102168201, 102188317, 102168873, 100860831, 102174200, 100861280, 102171973, 102173036, 102190376, 102172543	5434	21	13743	1.92692	1	1	1
GOTERM_BP_DIRECT	GO:0008104~protein localization	22	0.193509	0.00434987	102183051, 102183182, 102188456, 102188894, 102184280, 102179051, 102172859, 102172716, 102182453, 102168333, 102185445, 102188139, 102169061, 102177355, 102176331, 102189708, 102173325, 102172701, 102174568, 102177778, 102172771, 102175412	5434	33	13743	1.68605	1	1	1
GOTERM_BP_DIRECT	GO:0071277~cellular response to calcium ion	25	0.219896	0.00443299	102168515, 102179093, 100860839, 102184306, 102180500, 102176565, 102184818, 102180479, 102191183, 102179132, 102172668, 102175713, 102189390, 102190159, 102189762, 102169718, 102190716, 102182454, 102169278, 102169870, 102187887, 102171382, 102178936, 102179963, 102171520	5434	39	13743	1.6212	1	1	1
GOTERM_BP_DIRECT	GO:0043277~apoptotic cell clearance	10	0.0879585	0.00538381	100861394, 100860906, 102188350, 102189077, 102187813, 102179132, 102189528, 102184909, 102177449, 102185477	5434	11	13743	2.29916	1	1	1
GOTERM_BP_DIRECT	GO:0048814~regulation of dendrite morphogenesis	10	0.0879585	0.00538381	102182380, 102188214, 102179482, 106501886, 102182651, 102188857, 102191266, 102179852, 102174699, 102172047	5434	11	13743	2.29916	1	1	1
GOTERM_BP_DIRECT	GO:0001659~temperature homeostasis	11	0.0967543	0.0070437	102178127, 102172251, 102171382, 102186154, 102177355, 102181987, 102179193, 102181442, 102183353, 102181377, 102181465	5434	13	13743	2.13999	1	1	1
GOTERM_BP_DIRECT	GO:0032091~negative regulation of protein binding	32	0.281467	0.00837728	102189698, 102187152, 102183273, 102183696, 102185736, 102185318, 100861145, 102187336, 102174243, 102179756, 100861087, 102175417, 102179831, 102172587, 102179898, 102171917, 102188531, 102184232, 100860904, 108633301, 100846984, 100861159, 102187007, 102173142, 102178314, 102181855, 102184725, 102169450, 102173988, 102172870, 102177646, 102173962	5434	55	13743	1.47146	1	1	1
GOTERM_BP_DIRECT	GO:0006654~phosphatidic acid biosynthetic process	12	0.10555	0.008404	102173729, 102175275, 102189384, 102175409, 102184173, 102177282, 102183908, 102174434, 102173200, 102171485, 102176556, 102169567	5434	15	13743	2.02326	1	1	1
GOTERM_BP_DIRECT	GO:0045892~negative regulation of transcription, DNA-templated	90	0.791626	0.00881121	102190545, 100861208, 102188583, 108637538, 102186120, 102185877, 102169067, 102184982, 102169503, 108633532, 102178546, 102181901, 102170063, 108638462, 102171076, 102176760, 102173094, 102183409, 102179033, 102171798, 102191364, 106503058, 102191684, 102177657, 102173973, 102179678, 106503582, 102189762, 102187620, 108638419, 102187461, 102187428, 108637646, 102168489, 102184398, 102181003, 102…	5434	184	13743	1.23705	1	1	1
GOTERM_BP_DIRECT	GO:0046330~positive regulation of JNK cascade	37	0.325446	0.00942413	102169328, 102180480, 102186668, 102184789, 102169942, 102186147, 102168873, 102187833, 102188644, 102186424, 102180777, 102169582, 102175293, 106501756, 102178407, 102178565, 102174883, 102173637, 102170987, 102181145, 102191608, 102184810, 102183684, 100861338, 102176291, 102185604, 102188317, 102189744, 102180333, 102181955, 102178914, 102173267, 102174699, 102170375, 102177601, 102170354, 102…	5434	66	13743	1.41782	1	1	1
GOTERM_BP_DIRECT	GO:0008344~adult locomotory behavior	25	0.219896	0.0105797	102181070, 102188464, 102188960, 102169808, 102187055, 102179053, 108634223, 102180657, 102191080, 102173333, 102174787, 102172328, 102174848, 102183162, 102184259, 102168882, 102169899, 102184675, 102177187, 102177681, 102168483, 102176470, 102169790, 102190486, 102177646	5434	41	13743	1.54212	1	1	1
GOTERM_BP_DIRECT	GO:0006644~phospholipid metabolic process	23	0.202305	0.0111076	102168603, 102184141, 102185364, 102189026, 108638469, 102168220, 102169892, 102189517, 102169156, 102168673, 108634544, 108633234, 102186907, 102183913, 102177211, 102181946, 102179619, 102170280, 102170564, 102171567, 102170006, 102174302, 102172994	5434	37	13743	1.57213	1	1	1
GOTERM_BP_DIRECT	GO:0034614~cellular response to reactive oxygen species	16	0.140734	0.011285	102170408, 102184364, 102172625, 102186040, 102186120, 100860904, 102174947, 102185217, 100861117, 102188824, 102189528, 102176291, 102168469, 100861087, 102172767, 102171520	5434	23	13743	1.75936	1	1	1
GOTERM_BP_DIRECT	GO:0043536~positive regulation of blood vessel endothelial cell migration	17	0.149529	0.0115376	100860911, 102184232, 102180282, 102173967, 100860904, 102185338, 102185866, 102184966, 102188327, 102175981, 102180406, 102178396, 108633906, 102191364, 100860919, 102176415, 102173324	5434	25	13743	1.71977	1	1	1
GOTERM_BP_DIRECT	GO:0030073~insulin secretion	17	0.149529	0.0115376	102188455, 102169804, 102170904, 108637537, 102183076, 100860794, 108637276, 102169414, 102188117, 102184828, 102171480, 100861230, 102180336, 102179143, 102172953, 102177646, 102188090	5434	25	13743	1.71977	1	1	1
GOTERM_BP_DIRECT	GO:0009952~anterior/posterior pattern specification	37	0.325446	0.0127309	102191831, 102179053, 102169623, 108637277, 102182521, 102177412, 102178402, 102178465, 102177693, 106502427, 102178142, 102179155, 106503755, 106503632, 102171572, 102191388, 102190850, 102182270, 102188455, 102191768, 102169414, 102168764, 102187789, 100860842, 102182554, 102178513, 102169050, 102173186, 102172273, 102174970, 102172033, 102169330, 102168483, 102191112, 102170296, 102170178, 102…	5434	67	13743	1.39665	1	1	1
GOTERM_BP_DIRECT	GO:0016043~cellular component organization	10	0.0879585	0.0139683	102169825, 102186374, 102185088, 102188486, 102182076, 102171757, 102173942, 102170223, 102179059, 102191126	5434	12	13743	2.10756	1	1	1
GOTERM_BP_DIRECT	GO:0000122~negative regulation of transcription from RNA polymerase II promoter	181	1.59205	0.0152619	102168856, 100860914, 102184143, 102188344, 102189430, 102185072, 102189156, 102170813, 100860751, 102168297, 102177170, 100861046, 102187533, 102184421, 102187777, 102179756, 102176882, 106503937, 102178267, 102178386, 106503934, 102178142, 102174504, 102173018, 102190272, 102170301, 102191364, 102190550, 102175557, 102170781, 102174102, 102173774, 102185880, 102185881, 102186051, 102182651, 102…	5434	401	13743	1.14155	1	1	1
GOTERM_BP_DIRECT	GO:0007613~memory	25	0.219896	0.015558	102179250, 102189077, 102184768, 102186423, 102185499, 102181114, 100860973, 102176587, 102176244, 102191080, 102191183, 102178849, 102173333, 102191101, 106502271, 106503162, 102177917, 102185425, 102182871, 108633284, 108633301, 100861353, 102181217, 102182928, 102179849	5434	42	13743	1.5054	1	1	1
GOTERM_BP_DIRECT	GO:0043537~negative regulation of blood vessel endothelial cell migration	11	0.0967543	0.0159343	102186892, 102186663, 106502946, 102180406, 102174669, 102191708, 102191364, 102174833, 102180076, 102170314, 102175290	5434	14	13743	1.98713	1	1	1
GOTERM_BP_DIRECT	GO:0042127~regulation of cell proliferation	38	0.334242	0.0160847	102191757, 102189630, 102191459, 102184188, 102171867, 102175609, 108636048, 100861189, 102187973, 102181213, 102180641, 102181989, 102176244, 102187905, 102169582, 102179198, 102188162, 102172767, 102174500, 102174323, 102189643, 102187460, 102171657, 102174806, 102189340, 102190639, 102177085, 102180571, 102180076, 102185769, 100860842, 100860742, 102181147, 102182528, 102180604, 106502631, 106…	5434	70	13743	1.37293	1	1	1
GOTERM_BP_DIRECT	GO:0010628~positive regulation of gene expression	121	1.0643	0.0166786	102172718, 102179072, 100860911, 102186040, 102178141, 102169025, 102178381, 102177170, 102182645, 102181702, 108636085, 102179198, 102174982, 106502441, 102178787, 102185881, 108638419, 102180196, 102186219, 102169414, 102189966, 102183624, 102186579, 102178314, 102184829, 102180229, 100862660, 102177064, 100861294, 102188906, 100860919, 102183471, 102186186, 102174518, 108634089, 102183991, 102…	5434	260	13743	1.17699	1	1	1
GOTERM_BP_DIRECT	GO:0048565~digestive tract development	12	0.10555	0.0173281	102182050, 102185761, 100861386, 102170931, 102182518, 102191141, 102181683, 102183004, 102188714, 108637276, 108637752, 102182521	5434	16	13743	1.89681	1	1	1
GOTERM_BP_DIRECT	GO:0002357~defense response to tumor cell	7	0.0615709	0.0176428	102189897, 102171130, 102185182, 102174606, 102186416, 102174346, 102174982	5434	7	13743	2.52908	1	1	1
GOTERM_BP_DIRECT	GO:0001666~response to hypoxia	36	0.316651	0.0178024	102184364, 102185490, 102169808, 102189453, 102179250, 102168374, 102185736, 102181896, 102188327, 108634247, 100860810, 102168873, 100860831, 102182269, 102191264, 102176667, 102173973, 102178787, 102186276, 102171536, 102183004, 102180175, 102189725, 102184455, 102189766, 100860742, 102183518, 102169293, 102175385, 102171362, 102179849, 102191072, 102173700, 102171622, 102191454, 102170991	5434	66	13743	1.3795	1	1	1
GOTERM_BP_DIRECT	GO:0045785~positive regulation of cell adhesion	20	0.175917	0.0181504	102172718, 102185651, 102176938, 102187813, 102186636, 102190818, 102180197, 102185477, 102189645, 102169556, 102181631, 102183467, 102175981, 102181989, 102173238, 102170135, 102188280, 102177428, 102176007, 102171366	5434	32	13743	1.58067	1	1	1
GOTERM_BP_DIRECT	GO:0048469~cell maturation	19	0.167121	0.0185541	102187122, 106504031, 102183278, 102169892, 102189810, 102187503, 102181279, 108637781, 102179616, 102178704, 102177474, 102178386, 102180957, 102172028, 102178760, 102172821, 106502775, 102190154, 102177713	5434	30	13743	1.60175	1	1	1
GOTERM_BP_DIRECT	GO:0050482~arachidonic acid secretion	17	0.149529	0.0191099	102169713, 102171917, 102188141, 102168220, 102169892, 102189517, 102168673, 108633234, 102187899, 108634223, 102177355, 102172230, 106503219, 102170280, 102188084, 102170564, 102170006	5434	26	13743	1.65363	1	1	1
GOTERM_BP_DIRECT	GO:0032956~regulation of actin cytoskeleton organization	16	0.140734	0.0192066	102169848, 102185132, 102184374, 102179195, 102169409, 102176072, 102169870, 102180984, 102188644, 102182554, 102178225, 102179537, 102179559, 102182834, 102171994, 102174961	5434	24	13743	1.68605	1	1	1
GOTERM_BP_DIRECT	GO:0030336~negative regulation of cell migration	39	0.343038	0.0199372	102191810, 102190269, 102185495, 100860818, 102183251, 102186120, 102189451, 102180083, 102186328, 102169304, 102169503, 102184366, 102181631, 102183848, 102175498, 102177355, 102175590, 102169064, 102170201, 102174768, 102176824, 102178408, 102174520, 102178403, 102178787, 106503440, 102185560, 102170667, 102170986, 102180691, 102180274, 102186912, 102184356, 102183467, 100861254, 102181558, 102…	5434	73	13743	1.35115	1	1	1
GOTERM_BP_DIRECT	GO:0008285~negative regulation of cell proliferation	103	0.905972	0.022341	102183172, 102190269, 102181151, 102188583, 102184382, 102178141, 102169389, 100861289, 102187777, 102178704, 102178142, 102191364, 102178787, 102191226, 102168968, 102187428, 102188119, 102187789, 102183589, 102170270, 102179528, 102180348, 102191072, 102177064, 102191231, 102176779, 102173665, 102171366, 102191810, 102184681, 102189179, 102169526, 100860816, 102177355, 102183905, 102174768, 102…	5434	220	13743	1.18407	1	1	1
GOTERM_BP_DIRECT	GO:0046339~diacylglycerol metabolic process	8	0.0703668	0.0233093	102175275, 100861270, 102189384, 102184173, 102177282, 102183908, 102171485, 100861225	5434	9	13743	2.24807	1	1	1
GOTERM_BP_DIRECT	GO:0043433~negative regulation of sequence-specific DNA binding transcription factor activity	29	0.25508	0.0253361	102190008, 102187152, 102178141, 102184226, 102183157, 102183475, 102188646, 102186147, 102176620, 102177474, 102188719, 102173018, 102174504, 102171973, 102172701, 102175778, 102173712, 102176601, 102188574, 102185881, 102172808, 102183442, 102182889, 102172230, 102178693, 102190020, 102176779, 102177449, 102190101	5434	52	13743	1.41045	1	1	1
GOTERM_BP_DIRECT	GO:0001501~skeletal system development	21	0.184713	0.0261756	100860914, 102184186, 102191768, 100860907, 102180045, 102185687, 102168469, 100860842, 100860841, 102185413, 102179756, 102178704, 102177594, 102184827, 102190550, 102177328, 102179312, 102177986, 102172587, 102170530, 102177677	5434	35	13743	1.51745	1	1	1
GOTERM_BP_DIRECT	GO:0051000~positive regulation of nitric-oxide synthase activity	9	0.0791626	0.0271133	102171507, 102178475, 102188274, 100860904, 102184810, 102187716, 102170314, 102178674, 102183448	5434	11	13743	2.06924	1	1	1
GOTERM_BP_DIRECT	GO:0007088~regulation of mitotic nuclear division	9	0.0791626	0.0271133	102179019, 102188159, 102182081, 102179615, 102172307, 102175707, 102176581, 102177483, 102180199	5434	11	13743	2.06924	1	1	1
GOTERM_BP_DIRECT	GO:0006111~regulation of gluconeogenesis	9	0.0791626	0.0271133	102170645, 102189384, 102191042, 102185217, 102172632, 102168297, 100860794, 102186830, 102175632	5434	11	13743	2.06924	1	1	1
GOTERM_BP_DIRECT	GO:0034765~regulation of ion transmembrane transport	46	0.404609	0.0277771	102189138, 102190666, 100860977, 102175908, 106503290, 102185975, 102181332, 102182066, 102188248, 102184203, 102182956, 102176463, 102181309, 102191162, 102174425, 102177758, 102191682, 102172403, 102178206, 102170924, 102190458, 102187163, 102185061, 102169739, 102184215, 102168441, 102185724, 102184834, 102182414, 102189746, 102172195, 102183979, 102170294, 102176552, 102169395, 100861292, 102…	5434	90	13743	1.29264	1	1	1
GOTERM_BP_DIRECT	GO:0007155~cell adhesion	73	0.642097	0.0292779	102173608, 102171829, 102188740, 102183451, 102187813, 108636248, 102183255, 102187539, 102182645, 102188900, 102184664, 102171074, 102175394, 102178188, 102177374, 102173096, 102179198, 106501794, 102184791, 102190612, 102182131, 100860805, 102180076, 102183467, 102189888, 102171560, 102176451, 102174073, 102170114, 102171204, 102172535, 102170076, 102191356, 102171366, 100860818, 102188001, 102…	5434	152	13743	1.21462	1	1	1
GOTERM_BP_DIRECT	GO:0007601~visual perception	45	0.395813	0.0293304	102189435, 102188324, 102172934, 102187250, 102183372, 102182062, 108638601, 102180385, 102182860, 102169587, 102171909, 102183335, 102173010, 102176345, 102182679, 102184914, 102170521, 102191362, 102191562, 102179852, 102179413, 102191620, 102171256, 102168603, 102183182, 102188574, 102186872, 102190855, 102190899, 102191747, 100860828, 108636136, 102178372, 102182871, 102183101, 102168762, 102…	5434	88	13743	1.29328	1	1	1
GOTERM_BP_DIRECT	GO:0034122~negative regulation of toll-like receptor signaling pathway	10	0.0879585	0.0295488	102177268, 102190800, 102189430, 102183739, 102184966, 102184909, 102182006, 102186433, 100861323, 102177710	5434	13	13743	1.94544	1	1	1
GOTERM_BP_DIRECT	GO:0032691~negative regulation of interleukin-1 beta production	10	0.0879585	0.0295488	102191636, 102170904, 102171274, 102189077, 100860838, 100861189, 102183756, 102186433, 102190376, 102173973	5434	13	13743	1.94544	1	1	1
GOTERM_BP_DIRECT	GO:0097191~extrinsic apoptotic signaling pathway	16	0.140734	0.0307102	102186186, 102182762, 100860960, 102184966, 102187118, 108638499, 102174145, 102169293, 102180248, 100861293, 102191371, 102178407, 102191364, 102191388, 102173973, 102177601	5434	25	13743	1.61861	1	1	1
GOTERM_BP_DIRECT	GO:0045165~cell fate commitment	15	0.131938	0.0313412	102188455, 102183491, 102168539, 102179261, 108637407, 102168575, 108636457, 108637113, 100860831, 102181213, 100861032, 102174031, 102187819, 102179852, 102173973	5434	23	13743	1.6494	1	1	1
GOTERM_BP_DIRECT	GO:0032753~positive regulation of interleukin-4 production	12	0.10555	0.0317259	102190711, 102186420, 102179308, 102188350, 102183202, 102170884, 102172821, 108637430, 102182006, 102189714, 102188755, 102186985	5434	17	13743	1.78523	1	1	1
GOTERM_BP_DIRECT	GO:0071276~cellular response to cadmium ion	12	0.10555	0.0317259	100861087, 102170408, 102186040, 100860904, 102170554, 102176291, 102172767, 102188824, 102178552, 102168469, 100860951, 102171520	5434	17	13743	1.78523	1	1	1
GOTERM_BP_DIRECT	GO:1900017~positive regulation of cytokine production involved in inflammatory response	13	0.114346	0.031939	102191567, 102186154, 102170854, 102170987, 102169892, 102183463, 100860877, 102186424, 102181208, 102177420, 102177694, 102171111, 102174883	5434	19	13743	1.73042	1	1	1
GOTERM_BP_DIRECT	GO:0007626~locomotory behavior	30	0.263875	0.0320849	102182060, 102190603, 106503070, 102187835, 108638469, 102182167, 102187878, 100860871, 102185434, 102184665, 102182961, 102181114, 100860973, 102176244, 102171274, 102174668, 102175798, 102191101, 102185002, 102180591, 102169232, 102189726, 102180696, 102183812, 102181217, 100861291, 102179849, 102185718, 102176857, 102172771	5434	55	13743	1.3795	1	1	1
GOTERM_BP_DIRECT	GO:0014068~positive regulation of phosphatidylinositol 3-kinase signaling	29	0.25508	0.0338373	102187651, 102181171, 102189077, 102174518, 100860838, 102186108, 108634241, 100860794, 102182645, 102183115, 102177575, 102172943, 102175933, 102172562, 102174268, 102186892, 102190755, 102184034, 102184232, 102188790, 102185602, 102188857, 102176291, 102189626, 102174791, 106503626, 100861190, 102170076, 102175502	5434	53	13743	1.38383	1	1	1
GOTERM_BP_DIRECT	GO:0007224~smoothened signaling pathway	28	0.246284	0.0356869	102168539, 102171228, 100860953, 102186147, 102188788, 102169523, 108636284, 102183823, 102179616, 102177474, 102173170, 102178142, 102173755, 102188261, 102171572, 102191388, 102176700, 102177677, 102182050, 102168427, 102188258, 102180795, 102169259, 102170052, 108637781, 102175646, 102175007, 102175885	5434	51	13743	1.38851	1	1	1
GOTERM_BP_DIRECT	GO:0007411~axon guidance	37	0.325446	0.0363467	102189698, 102183372, 100861303, 108638469, 102187539, 102189659, 108637113, 102189976, 102184049, 102181114, 102178402, 106501979, 102183823, 102178142, 102170201, 102179992, 102172821, 102173333, 102190017, 102181063, 102174804, 108638419, 102182014, 102183168, 102181148, 102181324, 102185664, 102172908, 102187547, 102173482, 108636372, 102172230, 106503326, 102171324, 102171204, 102174855, 102…	5434	71	13743	1.31797	1	1	1
GOTERM_BP_DIRECT	GO:1901381~positive regulation of potassium ion transmembrane transport	6	0.0527751	0.0388163	102185061, 102174913, 108634428, 102168594, 102174855, 102176601	5434	6	13743	2.52908	1	1	1
GOTERM_BP_DIRECT	GO:0044794~positive regulation by host of viral process	6	0.0527751	0.0388163	102179922, 102176581, 100861303, 102170587, 102170314, 100860744	5434	6	13743	2.52908	1	1	1
GOTERM_BP_DIRECT	GO:0046834~lipid phosphorylation	6	0.0527751	0.0388163	102175275, 102189384, 102184173, 102177282, 102183908, 102171485	5434	6	13743	2.52908	1	1	1
GOTERM_BP_DIRECT	GO:0001655~urogenital system development	6	0.0527751	0.0388163	102180800, 102186352, 106504031, 102179312, 102171793, 102180665	5434	6	13743	2.52908	1	1	1
GOTERM_BP_DIRECT	GO:0043586~tongue development	6	0.0527751	0.0388163	100860901, 102186591, 102178142, 102181683, 102171973, 102177945	5434	6	13743	2.52908	1	1	1
GOTERM_BP_DIRECT	GO:0021846~cell proliferation in forebrain	6	0.0527751	0.0388163	102185491, 102171999, 102179261, 102171665, 102190850, 102184049	5434	6	13743	2.52908	1	1	1
GOTERM_BP_DIRECT	GO:0006874~cellular calcium ion homeostasis	26	0.228692	0.0396987	102187972, 102185072, 102183471, 102169025, 100860775, 102180679, 102176246, 102173496, 106502946, 102177594, 102188084, 102191364, 102186280, 102178765, 102186872, 102174969, 102170928, 102187106, 102175322, 102177983, 102177883, 102180626, 102174855, 102170314, 102191013, 102173104	5434	47	13743	1.39906	1	1	1
GOTERM_BP_DIRECT	GO:0042593~glucose homeostasis	43	0.378221	0.0404661	102189930, 108633538, 100860950, 102185217, 108634241, 100860794, 100861306, 108637276, 102184027, 102170063, 102176244, 102180336, 102180535, 102182514, 102172028, 102173778, 102189150, 102177713, 102177657, 102175632, 102190697, 102188214, 102186154, 102188574, 102170904, 102171659, 100860904, 102185601, 102183003, 102181145, 102180950, 102168425, 102187106, 100861392, 102177021, 102180907, 102…	5434	85	13743	1.27942	1	1	1
GOTERM_BP_DIRECT	GO:0070374~positive regulation of ERK1 and ERK2 cascade	60	0.527751	0.0410468	102189077, 100860838, 102169345, 102184349, 102188824, 102184789, 102169942, 102168896, 100860831, 102181113, 102170184, 102172767, 102173178, 102174268, 102186892, 102185560, 102184232, 102170987, 100861338, 102181799, 102176452, 102175362, 106503626, 102178396, 102177020, 102175206, 102170314, 102178674, 102187310, 108637839, 102186420, 102180480, 100861303, 102186668, 102183756, 102168873, 102…	5434	124	13743	1.22375	1	1	1
GOTERM_BP_DIRECT	GO:0032757~positive regulation of interleukin-8 production	25	0.219896	0.0418716	100860816, 100860796, 102184789, 100860794, 102187833, 102186029, 102186424, 102178244, 102179958, 102173292, 100860909, 102178407, 102190474, 102175557, 102174883, 102185560, 102186154, 100861338, 100860742, 102175981, 102174096, 102171227, 102177646, 102173125, 102172212	5434	45	13743	1.40504	1	1	1
GOTERM_BP_DIRECT	GO:0070059~intrinsic apoptotic signaling pathway in response to endoplasmic reticulum stress	17	0.149529	0.0446838	102185072, 102187450, 102178709, 108638625, 108637430, 102184398, 100846984, 102184015, 100861254, 102180626, 102171367, 102173008, 102173135, 102172870, 102175557, 102173973, 102170562	5434	28	13743	1.53551	1	1	1
GOTERM_BP_DIRECT	GO:0035176~social behavior	17	0.149529	0.0446838	102168988, 102168603, 102189698, 102190985, 102177917, 102174913, 102189077, 102187803, 108638002, 102168238, 100861353, 102176470, 102191141, 102173333, 102179852, 102190872, 102176203	5434	28	13743	1.53551	1	1	1
GOTERM_BP_DIRECT	GO:0042771~intrinsic apoptotic signaling pathway in response to DNA damage by p53 class mediator	17	0.149529	0.0446838	102184175, 108637803, 102183475, 102185955, 100861338, 102185329, 102188215, 102184015, 102182417, 102171367, 102190550, 102176943, 102191388, 102176667, 102173973, 102172730, 102179898	5434	28	13743	1.53551	1	1	1
GOTERM_BP_DIRECT	GO:0043524~negative regulation of neuron apoptotic process	44	0.387017	0.046867	102190106, 102169808, 102189572, 108633812, 102183179, 102186668, 108637430, 102184982, 102189810, 102182764, 102191183, 108637271, 102170720, 106503654, 102171793, 102172584, 102176787, 102185683, 102188574, 102184034, 102171999, 102179261, 102186878, 102183168, 102169892, 100846984, 102169798, 102184456, 102180448, 100861254, 102184725, 102184208, 102182607, 102176470, 102182749, 102179682, 102…	5434	88	13743	1.26454	1	1	1
GOTERM_BP_DIRECT	GO:0045059~positive thymic T cell selection	7	0.0615709	0.0469275	102185560, 102188214, 102176695, 102190716, 102173700, 102170201, 102191154	5434	8	13743	2.21294	1	1	1
GOTERM_BP_DIRECT	GO:0071468~cellular response to acidic pH	7	0.0615709	0.0469275	102180360, 102169542, 102186514, 102190031, 102175646, 100861026, 102179249	5434	8	13743	2.21294	1	1	1
GOTERM_BP_DIRECT	GO:0031113~regulation of microtubule polymerization	7	0.0615709	0.0469275	102179944, 106504042, 102186024, 106502666, 102172833, 102184349, 102179436	5434	8	13743	2.21294	1	1	1
GOTERM_BP_DIRECT	GO:0039536~negative regulation of RIG-I signaling pathway	7	0.0615709	0.0469275	102189335, 102175496, 102189255, 102182168, 102181990, 102183910, 102183820	5434	8	13743	2.21294	1	1	1
GOTERM_BP_DIRECT	GO:0006508~proteolysis	7	0.0615709	0.0469275	102185274, 102181613, 102179958, 102175735, 102178406, 102176723, 102190332	5434	8	13743	2.21294	1	1	1
GOTERM_BP_DIRECT	GO:0045893~positive regulation of transcription, DNA-templated	95	0.835606	0.0480703	102187651, 102187012, 102168539, 102189235, 102172917, 108637658, 102173846, 102173967, 102190703, 102170856, 102178020, 100860751, 102168896, 102184819, 102176882, 102178465, 102184737, 102191360, 100861283, 102190195, 102191001, 102191364, 102184180, 102179753, 102173178, 102177657, 102189962, 102185560, 102170748, 102189762, 102184071, 100860805, 102169894, 102176291, 102169777, 102185685, 102…	5434	207	13743	1.16069	1	1	1
GOTERM_BP_DIRECT	GO:0006865~amino acid transport	15	0.131938	0.0483297	108634701, 108633258, 108634722, 102191549, 102174869, 102183932, 108633279, 108634642, 102186985, 102174111, 102170293, 102183956, 102186969, 102188162, 102175435	5434	24	13743	1.58067	1	1	1
GOTERM_BP_DIRECT	GO:0050796~regulation of insulin secretion	14	0.123142	0.0500386	102170848, 102171629, 102170832, 100860816, 102185326, 100860794, 102168425, 100860742, 102179646, 108636284, 102170063, 102191080, 102177021, 102186280	5434	22	13743	1.60941	1	1	1
GOTERM_BP_DIRECT	GO:0034244~negative regulation of transcription elongation from RNA polymerase II promoter	8	0.0703668	0.0513076	102183374, 102180085, 102175538, 102170201, 106502235, 102169794, 102190101, 102170375	5434	10	13743	2.02326	1	1	1
GOTERM_BP_DIRECT	GO:0035914~skeletal muscle cell differentiation	21	0.184713	0.0517988	102190017, 102184287, 102185464, 108637538, 108637637, 102171109, 102182388, 102183475, 102185438, 102183991, 102184267, 102180343, 102182786, 102187789, 102184049, 102176112, 102172682, 102174260, 102179861, 102171520, 102175115	5434	37	13743	1.43542	1	1	1
GOTERM_BP_DIRECT	GO:0042472~inner ear morphogenesis	21	0.184713	0.0517988	102184493, 102186352, 102168539, 106504031, 102190603, 102174913, 102174804, 102185975, 102182167, 108634042, 102169585, 102184049, 102180014, 102172273, 102181317, 108634041, 102183937, 102173941, 102176119, 102172821, 102191510	5434	37	13743	1.43542	1	1	1
GOTERM_BP_DIRECT	GO:0061098~positive regulation of protein tyrosine kinase activity	12	0.10555	0.0528798	102187651, 102171917, 102184232, 102191814, 102188001, 102191829, 100861303, 102188083, 102169975, 102173115, 102184049, 102183467	5434	18	13743	1.68605	1	1	1
GOTERM_BP_DIRECT	GO:0007259~JAK-STAT cascade	12	0.10555	0.0528798	102175201, 102188354, 102170931, 100861318, 100861208, 102182821, 106503587, 108638069, 108638068, 102182764, 102176401, 102187711	5434	18	13743	1.68605	1	1	1
GOTERM_BP_DIRECT	GO:0042476~odontogenesis	12	0.10555	0.0528798	102185881, 102189554, 102180348, 102172329, 102179261, 102191826, 100860960, 102171104, 102177170, 102190000, 102177945, 102177997	5434	18	13743	1.68605	1	1	1
GOTERM_BP_DIRECT	GO:0010801~negative regulation of peptidyl-threonine phosphorylation	9	0.0791626	0.0534033	102180602, 102184188, 102190008, 102181151, 102189384, 102183267, 102169870, 108633301, 102177657	5434	12	13743	1.89681	1	1	1
GOTERM_BP_DIRECT	GO:0014003~oligodendrocyte development	9	0.0791626	0.0534033	102182050, 102180990, 102170201, 108635819, 102191364, 102179015, 102184443, 102187733, 102181620	5434	12	13743	1.89681	1	1	1
GOTERM_BP_DIRECT	GO:0016055~Wnt signaling pathway	38	0.334242	0.0534569	102189698, 102184185, 102182082, 102188324, 108637658, 106504040, 102170911, 102178141, 100860773, 102169860, 102182348, 102168732, 102179756, 102178569, 100860770, 102173071, 102191141, 102188280, 102173712, 102188083, 102175557, 102177435, 100860901, 102175918, 102187460, 102183168, 102180372, 108634037, 102186733, 102177302, 102178478, 102176310, 102180348, 102177945, 102172656, 102175700, 102…	5434	75	13743	1.2814	1	1	1
GOTERM_BP_DIRECT	GO:0045742~positive regulation of epidermal growth factor receptor signaling pathway	11	0.0967543	0.0537726	102187651, 102188341, 102173060, 106503626, 102178295, 108636136, 102186624, 102179730, 102171463, 102171485, 102168469	5434	16	13743	1.73874	1	1	1
GOTERM_BP_DIRECT	GO:0001656~metanephros development	11	0.0967543	0.0537726	106503097, 102172033, 102185881, 100861254, 106501749, 102178704, 102177693, 102179261, 102178142, 102169777, 102177997	5434	16	13743	1.73874	1	1	1
GOTERM_BP_DIRECT	GO:0007528~neuromuscular junction development	11	0.0967543	0.0537726	102181989, 102189179, 102171362, 102188220, 102169341, 102183372, 102174727, 102179198, 102173333, 102179059, 102172771	5434	16	13743	1.73874	1	1	1
GOTERM_BP_DIRECT	GO:0097192~extrinsic apoptotic signaling pathway in absence of ligand	11	0.0967543	0.0537726	102171716, 102170160, 102178478, 102189930, 100861254, 102172159, 102173448, 102183569, 100861289, 102170562, 100846984	5434	16	13743	1.73874	1	1	1
GOTERM_BP_DIRECT	GO:0033138~positive regulation of peptidyl-serine phosphorylation	34	0.299059	0.0540485	108637839, 102188244, 102185490, 102185318, 102169503, 102184367, 102184049, 102178145, 106502946, 102172767, 102191364, 102174787, 108638619, 102186099, 102188790, 100860904, 102185689, 102181287, 102185602, 102183267, 102183442, 102175981, 102169370, 102178478, 102174791, 102173122, 100861254, 102175362, 106502757, 102170894, 102177449, 102177646, 102170375, 102179688	5434	66	13743	1.30286	1	1	1
GOTERM_BP_DIRECT	GO:0032332~positive regulation of chondrocyte differentiation	10	0.0879585	0.0540549	102173939, 102169293, 102172033, 102178465, 102178396, 102178142, 102183278, 102172733, 102169777, 102177986	5434	14	13743	1.80648	1	1	1
GOTERM_BP_DIRECT	GO:0001836~release of cytochrome c from mitochondria	10	0.0879585	0.0540549	102185230, 102189930, 100861340, 102190744, 100861254, 102184935, 108633812, 102171367, 102170562, 100846984	5434	14	13743	1.80648	1	1	1
GOTERM_BP_DIRECT	GO:0051092~positive regulation of NF-kappaB transcription factor activity	51	0.448588	0.0556349	102170854, 102184789, 100860991, 102180544, 100861240, 102171591, 102187093, 106503654, 102189762, 102189168, 102185084, 102170987, 102191828, 100861338, 102168201, 102173180, 102187429, 102182975, 102189887, 102169533, 102185519, 102170277, 100860819, 100860816, 108634241, 102168873, 102187833, 102186424, 102177432, 102173110, 102170884, 102178407, 102190375, 102172584, 102174883, 102186396, 102…	5434	105	13743	1.22841	1	1	1
GOTERM_BP_DIRECT	GO:0001558~regulation of cell growth	19	0.167121	0.0575676	102188214, 102188531, 102188011, 102171999, 102190838, 100860950, 102183442, 102184134, 102182457, 102187844, 102181114, 102174541, 102182834, 102178377, 102174052, 102179198, 102173168, 102191103, 102177864	5434	33	13743	1.45613	1	1	1
GOTERM_BP_DIRECT	GO:0050728~negative regulation of inflammatory response	32	0.281467	0.0605942	100860814, 102187477, 102189430, 102169684, 100861189, 102183756, 102182247, 102187711, 102181801, 102183627, 102175496, 102190030, 102172821, 102191068, 102173637, 100860906, 102176829, 102168425, 102169293, 102176431, 102175660, 102172230, 102183812, 106503626, 100861393, 102183739, 102176815, 102171622, 102170314, 102184909, 102178873, 102173125	5434	62	13743	1.30533	1	1	1
GOTERM_BP_DIRECT	GO:0007417~central nervous system development	17	0.149529	0.0638972	102189677, 102185881, 102182513, 102169437, 102178225, 102178465, 108638391, 102182607, 106503326, 102188283, 102178880, 102175569, 102174800, 106503632, 102176779, 102173333, 102190168	5434	29	13743	1.48256	1	1	1
GOTERM_BP_DIRECT	GO:0045860~positive regulation of protein kinase activity	17	0.149529	0.0638972	102168910, 102185651, 102185051, 102173967, 100860806, 102176260, 102185877, 102187405, 102178040, 102184377, 102175293, 102170124, 102171963, 102178783, 102172953, 102191684, 102170530	5434	29	13743	1.48256	1	1	1
GOTERM_BP_DIRECT	GO:0065003~macromolecular complex assembly	22	0.193509	0.0658048	102186374, 102189762, 102187152, 106503062, 102170667, 102180591, 102188373, 102183475, 102169870, 102187803, 102172592, 102174354, 102171591, 102178987, 102178922, 108637781, 102177474, 102181627, 102173900, 102170445, 102174800, 102173973	5434	40	13743	1.39099	1	1	1
GOTERM_BP_DIRECT	GO:0007507~heart development	41	0.36063	0.0670289	102186960, 102169625, 102171228, 102170931, 102174913, 108638408, 102169047, 102177170, 102175290, 102187159, 102188966, 108637752, 102178402, 102180735, 102181989, 102180777, 102178142, 102170421, 106502004, 102189271, 102177677, 102179898, 102188577, 102185881, 102185024, 102185689, 102180672, 102187405, 102187427, 102189902, 108637007, 102187600, 102186214, 102179989, 102184725, 102179849, 102…	5434	83	13743	1.2493	1	1	1
GOTERM_BP_DIRECT	GO:0007229~integrin-mediated signaling pathway	34	0.299059	0.0670848	102173608, 102183451, 102171801, 102177707, 102187813, 102185415, 102181695, 102179809, 102184349, 102182645, 102180368, 102185499, 100861185, 102176587, 102180910, 102171074, 102175795, 102170184, 102177575, 102178188, 102178408, 102178783, 102180190, 102173619, 102169839, 102184810, 102188831, 102189645, 102179669, 102176451, 102174073, 102172115, 102191175, 102177428	5434	67	13743	1.28341	1	1	1
GOTERM_BP_DIRECT	GO:0009749~response to glucose	16	0.140734	0.067265	102188455, 108637537, 102183076, 102169718, 102169414, 102184828, 106502509, 102180336, 102170063, 102191080, 102170197, 102191266, 102190474, 102191069, 102175632, 102173125	5434	27	13743	1.49871	1	1	1
GOTERM_BP_DIRECT	GO:0098609~cell-cell adhesion	26	0.228692	0.0678334	102187673, 102170931, 102187395, 102169564, 102183255, 100861223, 102180217, 102177334, 102187093, 102172767, 102181928, 106503654, 102176987, 102172301, 102176864, 108633226, 102172648, 100861254, 102173682, 102172076, 102177782, 102182705, 102172899, 102171567, 106502299, 102178216	5434	49	13743	1.34196	1	1	1
GOTERM_BP_DIRECT	GO:0045786~negative regulation of cell cycle	15	0.131938	0.0707545	102174919, 100860818, 102186120, 102183475, 102185438, 102178040, 102184289, 100860831, 102179528, 102179508, 102171006, 102172821, 102191364, 102177713, 102177998	5434	25	13743	1.51745	1	1	1
GOTERM_BP_DIRECT	GO:0016477~cell migration	43	0.378221	0.0719991	102173608, 102171829, 102172917, 102171801, 102173428, 102186120, 102187813, 102180462, 100860796, 108637139, 102184966, 102183316, 102182743, 102185433, 102180222, 102179537, 102177697, 102177474, 102173438, 102176802, 102172788, 102179037, 102170781, 102191102, 102189883, 102183187, 102188650, 102183685, 102180372, 102185746, 102189727, 102180076, 102183346, 102180800, 102178478, 102170174, 102…	5434	88	13743	1.2358	1	1	1
GOTERM_BP_DIRECT	GO:0042157~lipoprotein metabolic process	14	0.123142	0.0743452	102170968, 102189476, 102172606, 102184569, 102180141, 102183985, 102172041, 102170691, 102183707, 102170588, 102170314, 102171143, 102190474, 102179303	5434	23	13743	1.53944	1	1	1
GOTERM_BP_DIRECT	GO:0014065~phosphatidylinositol 3-kinase signaling	14	0.123142	0.0743452	102181151, 100860838, 100860904, 102183910, 102188985, 102188710, 102181989, 102177551, 102190094, 102170796, 102173713, 102172821, 102173448, 102178674	5434	23	13743	1.53944	1	1	1
GOTERM_BP_DIRECT	GO:0030010~establishment of cell polarity	13	0.114346	0.0780032	102188214, 102191249, 102185771, 102170931, 102185094, 102179791, 108633296, 102178709, 102168453, 102178248, 102170201, 102171665, 102186280	5434	21	13743	1.56562	1	1	1
GOTERM_BP_DIRECT	GO:0051898~negative regulation of protein kinase B signaling	19	0.167121	0.0782585	106502021, 102187169, 102171109, 108637803, 102177355, 102181888, 100861280, 106503626, 100861393, 102191284, 102174768, 102173713, 102173712, 102173327, 102177657, 102175557, 102172212, 102178403, 102171201	5434	34	13743	1.41331	1	1	1
GOTERM_BP_DIRECT	GO:0048146~positive regulation of fibroblast proliferation	19	0.167121	0.0782585	102185560, 108637839, 102184232, 102171306, 100860806, 100860838, 102180281, 102168201, 102182645, 102180014, 102174692, 102182607, 102173018, 102191364, 102177449, 102173973, 102190168, 102174268, 102179898	5434	34	13743	1.41331	1	1	1
GOTERM_BP_DIRECT	GO:0008306~associative learning	12	0.10555	0.0816734	102168603, 102190985, 102185771, 102178145, 102178739, 102191183, 102182749, 102173700, 102175713, 102168337, 102187789, 102171212	5434	19	13743	1.59731	1	1	1
GOTERM_BP_DIRECT	GO:0048741~skeletal muscle fiber development	12	0.10555	0.0816734	100861395, 102171362, 108637637, 102176581, 102182271, 102181442, 102180163, 102174568, 102179168, 102175625, 102171572, 102169259	5434	19	13743	1.59731	1	1	1
GOTERM_BP_DIRECT	GO:0033344~cholesterol efflux	12	0.10555	0.0816734	102184956, 102178475, 102183707, 102175208, 102181472, 102184569, 102189408, 102190044, 102170314, 102190474, 102183985, 102175224	5434	19	13743	1.59731	1	1	1
GOTERM_BP_DIRECT	GO:0098703~calcium ion import across plasma membrane	5	0.0439792	0.0834625	102171382, 102190738, 102182871, 102186514, 102180651	5434	5	13743	2.52908	1	1	1
GOTERM_BP_DIRECT	GO:0046890~regulation of lipid biosynthetic process	5	0.0439792	0.0834625	102171859, 102171306, 102173435, 102189528, 102168742	5434	5	13743	2.52908	1	1	1
GOTERM_BP_DIRECT	GO:0034405~response to fluid shear stress	5	0.0439792	0.0834625	102174145, 102170931, 100860904, 102185338, 102173324	5434	5	13743	2.52908	1	1	1
GOTERM_BP_DIRECT	GO:0061518~microglial cell proliferation	5	0.0439792	0.0834625	102185051, 102189077, 100861303, 102189810, 102173115	5434	5	13743	2.52908	1	1	1
GOTERM_BP_DIRECT	GO:0033033~negative regulation of myeloid cell apoptotic process	5	0.0439792	0.0834625	108637839, 100861254, 102171373, 102178791, 106501794	5434	5	13743	2.52908	1	1	1
GOTERM_BP_DIRECT	GO:1902262~apoptotic process involved in blood vessel morphogenesis	5	0.0439792	0.0834625	100860901, 102186416, 106503755, 102170562, 100846984	5434	5	13743	2.52908	1	1	1
GOTERM_BP_DIRECT	GO:0034384~high-density lipoprotein particle clearance	5	0.0439792	0.0834625	102178475, 102184569, 102170314, 102190474, 102186579	5434	5	13743	2.52908	1	1	1
GOTERM_BP_DIRECT	GO:0010587~miRNA catabolic process	5	0.0439792	0.0834625	102179613, 102172121, 102170788, 108633242, 102171479	5434	5	13743	2.52908	1	1	1
GOTERM_BP_DIRECT	GO:0006303~double-strand break repair via nonhomologous end joining	11	0.0967543	0.085268	100861350, 102184452, 102182833, 102170905, 102171625, 106501777, 102186043, 102189195, 102185877, 102188827, 102180467	5434	17	13743	1.63646	1	1	1
GOTERM_BP_DIRECT	GO:0070328~triglyceride homeostasis	11	0.0967543	0.085268	102187122, 102170063, 102178475, 100860906, 100860916, 102171704, 100861190, 102170314, 102179303, 102183985, 102175632	5434	17	13743	1.63646	1	1	1
GOTERM_BP_DIRECT	GO:0071392~cellular response to estradiol stimulus	11	0.0967543	0.085268	100861395, 100860823, 102175362, 108634095, 108637637, 106503626, 108637271, 102169355, 102172767, 100861366, 102189238	5434	17	13743	1.63646	1	1	1
GOTERM_BP_DIRECT	GO:0006094~gluconeogenesis	11	0.0967543	0.085268	102179922, 102176111, 102179979, 102185072, 102185744, 102180907, 102183991, 102189150, 102168742, 102168433, 102184027	5434	17	13743	1.63646	1	1	1
GOTERM_BP_DIRECT	GO:1903078~positive regulation of protein localization to plasma membrane	22	0.193509	0.0859931	102187169, 106504040, 102189010, 102189077, 100860904, 102184866, 102184966, 102185499, 102183622, 102184049, 102172251, 102175891, 102182427, 102173220, 106502946, 102175362, 106503626, 102172767, 102179168, 102179730, 102174874, 102176007	5434	41	13743	1.35707	1	1	1
GOTERM_BP_DIRECT	GO:0006954~inflammatory response	66	0.580526	0.0860242	102189753, 102173967, 102168936, 102186921, 102184789, 100860877, 102180544, 100860831, 100860874, 102179713, 102171272, 102174145, 100861286, 102182719, 100860909, 102191364, 102186280, 102178783, 102171111, 102177975, 102187460, 102171712, 102182135, 102185404, 100861338, 102168201, 102183463, 102184079, 100860844, 102182455, 102187106, 102172770, 102183735, 102171325, 102191397, 102190100, 102…	5434	143	13743	1.16727	1	1	1
GOTERM_BP_DIRECT	GO:0042733~embryonic digit morphogenesis	26	0.228692	0.0861035	102185175, 102190545, 102168539, 102177170, 102169503, 102182521, 102185017, 102178402, 102179616, 102177693, 102178142, 102170201, 102171973, 106503755, 102177997, 102173950, 100860842, 102189723, 100860841, 102180795, 102172033, 102171665, 102173966, 102190088, 102178974, 102175885	5434	50	13743	1.31512	1	1	1
GOTERM_BP_DIRECT	GO:0032740~positive regulation of interleukin-17 production	10	0.0879585	0.0886449	102170987, 102188790, 102180957, 102178680, 102170884, 100861190, 102191364, 102174883, 102186985, 102186424	5434	15	13743	1.68605	1	1	1
GOTERM_BP_DIRECT	GO:0001516~prostaglandin biosynthetic process	10	0.0879585	0.0886449	102185560, 108637839, 102172230, 102188141, 102184926, 102178240, 106502686, 102181874, 102172909, 102181465	5434	15	13743	1.68605	1	1	1
GOTERM_BP_DIRECT	GO:1904355~positive regulation of telomere capping	10	0.0879585	0.0886449	102174243, 102169560, 102186040, 102183251, 102186043, 102187516, 102170884, 102188824, 102173178, 102172543	5434	15	13743	1.68605	1	1	1
GOTERM_BP_DIRECT	GO:0090050~positive regulation of cell migration involved in sprouting angiogenesis	10	0.0879585	0.0886449	102186892, 102187169, 106504031, 106501749, 102187960, 102173173, 102177869, 102184349, 102173036, 100860951	5434	15	13743	1.68605	1	1	1
GOTERM_BP_DIRECT	GO:0046718~viral entry into host cell	10	0.0879585	0.0886449	102173295, 102180735, 102171560, 106502757, 102187813, 102169766, 100861321, 102179963, 102174323, 102187568	5434	15	13743	1.68605	1	1	1
GOTERM_BP_DIRECT	GO:0007389~pattern specification process	10	0.0879585	0.0886449	100860914, 102178225, 108633766, 102185761, 102184208, 102178013, 102178708, 102186328, 102184773, 100860841	5434	15	13743	1.68605	1	1	1
GOTERM_BP_DIRECT	GO:0006836~neurotransmitter transport	10	0.0879585	0.0886449	102187167, 108636250, 102190843, 102190515, 102191617, 102182486, 102171155, 102170561, 102183579, 102172245	5434	15	13743	1.68605	1	1	1
GOTERM_BP_DIRECT	GO:0007219~Notch signaling pathway	39	0.343038	0.0898004	102183491, 102190545, 102189630, 108633372, 102185498, 100860877, 100860831, 102183479, 102187514, 102188523, 102177474, 102188719, 102191364, 102177713, 102176700, 102176247, 108633348, 102189202, 102187185, 102171659, 102190715, 102174191, 102180396, 102182594, 102169414, 102186039, 102173560, 108637184, 102176354, 106501749, 108637781, 102177363, 102174031, 102180406, 102177020, 106501743, 102…	5434	80	13743	1.23292	1	1	1
GOTERM_BP_DIRECT	GO:0050885~neuromuscular process controlling balance	21	0.184713	0.0913582	102168603, 102190985, 102188464, 102183157, 102180045, 102184349, 108636457, 108634042, 102169585, 102187803, 102186423, 102168831, 102182406, 102178569, 102181304, 102182749, 102177097, 102171037, 102170720, 102175798, 102190510	5434	39	13743	1.36181	1	1	1
GOTERM_BP_DIRECT	GO:0070509~calcium ion import	9	0.0791626	0.0915706	102185429, 102187163, 102177581, 102187450, 102185724, 102178040, 102172166, 102171809, 102171047	5434	13	13743	1.7509	1	1	1
GOTERM_BP_DIRECT	GO:0051044~positive regulation of membrane protein ectodomain proteolysis	9	0.0791626	0.0915706	102189523, 102168910, 102185585, 102168408, 102169718, 100860816, 102170314, 106503654, 102183457	5434	13	13743	1.7509	1	1	1
GOTERM_BP_DIRECT	GO:0030100~regulation of endocytosis	9	0.0791626	0.0915706	102183172, 102190984, 102178455, 102185210, 102191814, 102182970, 102168201, 102171045, 102175568	5434	13	13743	1.7509	1	1	1
GOTERM_BP_DIRECT	GO:1901985~positive regulation of protein acetylation	6	0.0527751	0.0917501	102175134, 102178145, 102169495, 102185318, 100861366, 102170354	5434	7	13743	2.16778	1	1	1
GOTERM_BP_DIRECT	GO:0070314~G1 to G0 transition	6	0.0527751	0.0917501	102188214, 102179819, 102169983, 102169323, 102190101, 102178128	5434	7	13743	2.16778	1	1	1
GOTERM_BP_DIRECT	GO:0061635~regulation of protein complex stability	6	0.0527751	0.0917501	102172251, 102175551, 102190316, 102191370, 102176519, 102189528	5434	7	13743	2.16778	1	1	1
GOTERM_BP_DIRECT	GO:0006646~phosphatidylethanolamine biosynthetic process	6	0.0527751	0.0917501	102173729, 102186563, 102179132, 102168574, 102189889, 102173874	5434	7	13743	2.16778	1	1	1
GOTERM_BP_DIRECT	GO:0060039~pericardium development	6	0.0527751	0.0917501	102188455, 102169293, 102181683, 102186328, 102183113, 100860831	5434	7	13743	2.16778	1	1	1
GOTERM_BP_DIRECT	GO:0035313~wound healing, spreading of epidermal cells	6	0.0527751	0.0917501	102183518, 102176587, 102185462, 102186663, 102171665, 102188327	5434	7	13743	2.16778	1	1	1
GOTERM_BP_DIRECT	GO:0051403~stress-activated MAPK cascade	6	0.0527751	0.0917501	102186040, 102188824, 102173178, 102188644, 100860996, 102184510	5434	7	13743	2.16778	1	1	1
GOTERM_BP_DIRECT	GO:0071493~cellular response to UV-B	6	0.0527751	0.0917501	102188214, 102172770, 102190636, 102173238, 102172212, 102179898	5434	7	13743	2.16778	1	1	1
GOTERM_BP_DIRECT	GO:0048168~regulation of neuronal synaptic plasticity	6	0.0527751	0.0917501	102173549, 102191826, 102186423, 102170917, 102181324, 102182488	5434	7	13743	2.16778	1	1	1
GOTERM_BP_DIRECT	GO:0045176~apical protein localization	6	0.0527751	0.0917501	102172186, 102170667, 102189583, 108634335, 102179831, 102182554	5434	7	13743	2.16778	1	1	1
GOTERM_BP_DIRECT	GO:0032964~collagen biosynthetic process	6	0.0527751	0.0917501	102186353, 100860828, 102188119, 102171265, 102171002, 102181235	5434	7	13743	2.16778	1	1	1
GOTERM_BP_DIRECT	GO:0021680~cerebellar Purkinje cell layer development	6	0.0527751	0.0917501	102182630, 102170720, 102171149, 102191101, 102190486, 102169899	5434	7	13743	2.16778	1	1	1
GOTERM_BP_DIRECT	GO:0051650~establishment of vesicle localization	6	0.0527751	0.0917501	102171591, 102168869, 102182928, 102179195, 102186280, 102171364	5434	7	13743	2.16778	1	1	1
GOTERM_BP_DIRECT	GO:0043583~ear development	6	0.0527751	0.0917501	102171716, 102170738, 100861254, 102174946, 102182457, 102189723	5434	7	13743	2.16778	1	1	1
GOTERM_BP_DIRECT	GO:1900029~positive regulation of ruffle assembly	6	0.0527751	0.0917501	106503770, 102186668, 102187979, 102168577, 102179037, 102171454	5434	7	13743	2.16778	1	1	1
GOTERM_BP_DIRECT	GO:0048009~insulin-like growth factor receptor signaling pathway	6	0.0527751	0.0917501	102188464, 102188188, 100860838, 100860904, 102173910, 102188710	5434	7	13743	2.16778	1	1	1
GOTERM_BP_DIRECT	GO:0051091~positive regulation of sequence-specific DNA binding transcription factor activity	32	0.281467	0.0922533	102185232, 102180281, 100860831, 102184049, 102176620, 100861386, 102178120, 102174669, 106503755, 102183809, 102177417, 102188083, 102175713, 102175557, 102171058, 100860823, 100860806, 102171659, 102186295, 100860904, 102183004, 102185602, 108636457, 102180076, 102189843, 102168820, 102180014, 102169259, 102173700, 102175668, 102171567, 102178552	5434	64	13743	1.26454	1	1	1
GOTERM_BP_DIRECT	GO:0045880~positive regulation of smoothened signaling pathway	16	0.140734	0.0933201	108634526, 102184110, 102170667, 102171659, 102169685, 102182651, 102169523, 102171194, 102174299, 102179616, 102170201, 102175836, 102177518, 102171572, 102177943, 102176700	5434	28	13743	1.44519	1	1	1
GOTERM_BP_DIRECT	GO:0010667~negative regulation of cardiac muscle cell apoptotic process	8	0.0703668	0.0936475	102180349, 102191093, 102183004, 102171973, 102183475, 102184966, 102169503, 102183115	5434	11	13743	1.83933	1	1	1
GOTERM_BP_DIRECT	GO:0048026~positive regulation of mRNA splicing, via spliceosome	8	0.0703668	0.0936475	102169837, 108634041, 102183284, 102189195, 102170653, 102176879, 102191442, 102177768	5434	11	13743	1.83933	1	1	1
GOTERM_BP_DIRECT	GO:2000311~regulation of AMPA receptor activity	8	0.0703668	0.0936475	102190985, 102174727, 102174172, 102177140, 108638090, 108638201, 102175545, 102190872	5434	11	13743	1.83933	1	1	1
GOTERM_BP_DIRECT	GO:0030225~macrophage differentiation	8	0.0703668	0.0936475	102174211, 102175262, 100861208, 102174806, 102180957, 102186416, 102170124, 102177713	5434	11	13743	1.83933	1	1	1
GOTERM_BP_DIRECT	GO:0032270~positive regulation of cellular protein metabolic process	8	0.0703668	0.0936475	102172230, 100860906, 102186040, 102171665, 102188824, 102191364, 102184421, 102175236	5434	11	13743	1.83933	1	1	1
GOTERM_BP_DIRECT	GO:0030099~myeloid cell differentiation	8	0.0703668	0.0936475	102168922, 102184462, 102178386, 102178690, 102178791, 102191595, 102168764, 102173973	5434	11	13743	1.83933	1	1	1
GOTERM_BP_DIRECT	GO:0098719~sodium ion import across plasma membrane	8	0.0703668	0.0936475	102175485, 102171060, 102169542, 102190031, 102182435, 100861026, 102174685, 102179249	5434	11	13743	1.83933	1	1	1
GOTERM_BP_DIRECT	GO:0042755~eating behavior	8	0.0703668	0.0936475	102186154, 102181887, 102183812, 102179849, 102174946, 102187878, 100860794, 102170197	5434	11	13743	1.83933	1	1	1
GOTERM_BP_DIRECT	GO:0097320~plasma membrane tubulation	8	0.0703668	0.0936475	102173032, 102189523, 102177840, 102168910, 102185585, 102189213, 100860994, 102181011	5434	11	13743	1.83933	1	1	1
GOTERM_BP_DIRECT	GO:0046598~positive regulation of viral entry into host cell	7	0.0615709	0.0941639	102169902, 102185560, 102177782, 102183409, 102170124, 102180351, 100860991	5434	9	13743	1.96706	1	1	1
GOTERM_BP_DIRECT	GO:0045667~regulation of osteoblast differentiation	7	0.0615709	0.0941639	102185072, 102178363, 102175836, 102173757, 102186280, 102173379, 102170530	5434	9	13743	1.96706	1	1	1
GOTERM_BP_DIRECT	GO:0034497~protein localization to pre-autophagosomal structure	7	0.0615709	0.0941639	102180716, 102174392, 102171213, 102182964, 102171561, 106502003, 102181325	5434	9	13743	1.96706	1	1	1
GOTERM_BP_DIRECT	GO:0042273~ribosomal large subunit biogenesis	7	0.0615709	0.0941639	102191117, 102187031, 102184270, 102176639, 102171621, 102185498, 102177865	5434	9	13743	1.96706	1	1	1
GOTERM_BP_DIRECT	GO:0097011~cellular response to granulocyte macrophage colony-stimulating factor stimulus	7	0.0615709	0.0941639	102183627, 100861208, 102186040, 100860904, 102170124, 102185434, 100861577	5434	9	13743	1.96706	1	1	1
GOTERM_BP_DIRECT	GO:0048485~sympathetic nervous system development	7	0.0615709	0.0941639	108637669, 102171973, 102186954, 102190550, 102172821, 102172584, 102169798	5434	9	13743	1.96706	1	1	1
GOTERM_BP_DIRECT	GO:0001867~complement activation, lectin pathway	7	0.0615709	0.0941639	102185274, 102181613, 102179958, 102171378, 102169785, 102178406, 102175466	5434	9	13743	1.96706	1	1	1
GOTERM_BP_DIRECT	GO:0043691~reverse cholesterol transport	7	0.0615709	0.0941639	102180336, 102178475, 102183707, 102184569, 102170314, 102190474, 102191574	5434	9	13743	1.96706	1	1	1
GOTERM_BP_DIRECT	GO:0000165~MAPK cascade	15	0.131938	0.0990177	102186443, 102179261, 102190716, 100860816, 102184226, 102175290, 102168896, 102185324, 102177068, 100861190, 102178552, 102191364, 102175799, 106504026, 102173651	5434	26	13743	1.45908	1	1	1
GOTERM_BP_DIRECT	GO:0051973~positive regulation of telomerase activity	15	0.131938	0.0990177	102169900, 102186040, 102184270, 102183251, 102186043, 102187516, 102188824, 102174243, 102176882, 102170884, 102171479, 102179312, 102173178, 102172543, 102173950	5434	26	13743	1.45908	1	1	1

## Sheet: GO_C2
Category	Term	Count	%	PValue	Genes	List Total	Pop Hits	Pop Total	Fold Enrichment	Bonferroni	Benjamini	FDR
GOTERM_MF_DIRECT	GO:0042802~identical protein binding	203	3.49157	3.62794e-05	106503372, 102186046, 102172318, 102188341, 102179075, 100860916, 102187010, 102169389, 102184789, 108634223, 102168290, 102181706, 102177694, 106501993, 102185192, 102172568, 102190550, 102171595, 102178787, 102170704, 102170826, 102189207, 102181963, 102171480, 102171362, 102179760, 102178552, 102172458, 102188247, 102171927, 102188003, 102187152, 102169807, 102169244, 102181176, 102169920, 102…	2455	964	15148	1.29934	0.051728	0.053113	0.053113
GOTERM_MF_DIRECT	GO:0047834~D-threo-aldose 1-dehydrogenase activity	12	0.206398	0.00536952	102187782, 102170282, 102176340, 102189495, 102189770, 102187504, 102177638, 102188418, 102187204, 102187646, 102187932, 106503221	2455	30	15148	2.46811	0.999623	1	1
GOTERM_MF_DIRECT	GO:0015431~glutathione S-conjugate-exporting ATPase activity	5	0.0859993	0.00782145	102175509, 102178034, 102177770, 102181156, 102174986	2455	6	15148	5.14189	0.99999	1	1
GOTERM_MF_DIRECT	GO:0042910~xenobiotic transporter activity	6	0.103199	0.00788545	102190515, 102177770, 102176758, 102188270, 100861013, 102183874	2455	9	15148	4.11351	0.999991	1	1
GOTERM_MF_DIRECT	GO:0046982~protein heterodimerization activity	60	1.03199	0.0100771	102186045, 108633414, 108633412, 102173090, 102182243, 100860793, 102180587, 100861124, 102169187, 102178586, 106503499, 102171353, 102175951, 102187024, 102188114, 102172928, 102184232, 102191748, 102186098, 102169774, 102189408, 102182458, 102185049, 102181912, 102191191, 100861254, 102176130, 102176174, 102180703, 102182848, 106503501, 102178870, 108633916, 102186170, 102178552, 102191457, 102…	2455	272	15148	1.36109	1	1	1
GOTERM_MF_DIRECT	GO:0005227~calcium activated cation channel activity	7	0.120399	0.0109902	102169109, 102175065, 102175193, 102188404, 102176305, 102182435, 102188963	2455	13	15148	3.32245	1	1	1
GOTERM_MF_DIRECT	GO:0070530~K63-linked polyubiquitin binding	8	0.137599	0.0125634	102172251, 102169927, 106502972, 102172458, 108633212, 102189734, 102184610, 102176555	2455	17	15148	2.90365	1	1	1
GOTERM_MF_DIRECT	GO:0000287~magnesium ion binding	46	0.791194	0.0130796	102185692, 102185451, 102191713, 102172719, 102186140, 102179194, 102170018, 102189750, 102179791, 102180885, 102185951, 102181630, 102168457, 102181037, 102179613, 102178248, 102178625, 102175374, 102176263, 102191283, 102171699, 102191022, 102175812, 102190971, 102177952, 102169957, 102168943, 102184055, 102188453, 102189485, 102185041, 102188252, 102178709, 102189528, 102184735, 102180994, 102…	2455	201	15148	1.4121	1	1	1
GOTERM_MF_DIRECT	GO:0022857~transmembrane transporter activity	29	0.498796	0.0153673	108634722, 102189576, 102186042, 102188747, 108633279, 108634642, 102184047, 102175135, 102178125, 102176327, 102175435, 102179479, 102174685, 102186773, 102190515, 102191549, 102174949, 102178929, 102187528, 102168247, 102181622, 102187500, 102182411, 102169897, 102174111, 102178379, 102191172, 102170555, 102173224	2455	115	15148	1.55598	1	1	1
GOTERM_MF_DIRECT	GO:0046983~protein dimerization activity	36	0.619195	0.0192575	106503351, 102190504, 108637538, 108637637, 102170812, 102186021, 102183394, 108637738, 102175290, 100861003, 102168994, 102168854, 102173570, 102180336, 100860908, 102170387, 102189820, 102185881, 102177085, 102169535, 102181047, 100861038, 102177401, 100861252, 102175143, 102182889, 102181954, 102176770, 100861391, 102186408, 102180703, 102178693, 108635819, 106502233, 102175986, 102171168	2455	153	15148	1.45183	1	1	1
GOTERM_MF_DIRECT	GO:0032794~GTPase activating protein binding	6	0.103199	0.0217861	102190910, 102170018, 100861360, 102183542, 102173366, 102186007	2455	11	15148	3.3656	1	1	1
GOTERM_MF_DIRECT	GO:0042803~protein homodimerization activity	99	1.70279	0.0226171	100860911, 102173925, 102190826, 102182243, 102169304, 102171476, 102174862, 102173411, 102187024, 102169531, 102187702, 102169774, 102189723, 102184828, 102178036, 102182926, 102179885, 108637637, 102178680, 102175171, 102187833, 102178168, 102177474, 102178287, 106501777, 102174922, 102173039, 102178565, 102170562, 102172069, 102185783, 102189461, 102189583, 102189066, 102180771, 100860943, 102…	2455	500	15148	1.22171	1	1	1
GOTERM_MF_DIRECT	GO:0031267~small GTPase binding	44	0.756794	0.0265783	102186188, 102188247, 102190226, 102185299, 102186046, 102181692, 102181011, 102184845, 102185476, 102180762, 102186567, 102183869, 102174880, 102187729, 108633290, 102169361, 102170565, 102190451, 102179995, 102178522, 102171476, 102174862, 102188796, 108638619, 102190910, 102189066, 102178906, 102181287, 102189727, 102169398, 100860943, 100861013, 102186334, 102174651, 102175144, 102178133, 102…	2455	199	15148	1.36428	1	1	1
GOTERM_MF_DIRECT	GO:0043621~protein self-association	14	0.240798	0.0274094	102187488, 102187185, 102170987, 102184085, 102181392, 108633200, 102179559, 106503208, 102173314, 102178552, 102190375, 102170375, 102174883, 102173521	2455	46	15148	1.87791	1	1	1
GOTERM_MF_DIRECT	GO:0005078~MAP-kinase scaffold activity	5	0.0859993	0.027793	102189340, 102184845, 102190872, 102190520, 102180333	2455	8	15148	3.85642	1	1	1
GOTERM_MF_DIRECT	GO:0004674~protein serine/threonine kinase activity	49	0.842793	0.038012	102187576, 102168659, 102185318, 102180932, 106501913, 102175590, 102191283, 102176803, 102173333, 102190431, 102172729, 106502252, 108638619, 102183187, 102189485, 102170623, 102178709, 102168520, 102185604, 102180356, 102184398, 102182138, 102187668, 102183940, 102170074, 102172930, 102191751, 102173740, 102174796, 102171927, 102188644, 100860973, 102174243, 102178248, 106501977, 102191022, 102…	2455	231	15148	1.30884	1	1	1
GOTERM_MF_DIRECT	GO:0043021~ribonucleoprotein complex binding	9	0.154799	0.0384265	102169616, 102191812, 102188288, 106503460, 102181816, 102184935, 102178837, 102176261, 102172047	2455	25	15148	2.2213	1	1	1
GOTERM_MF_DIRECT	GO:0005452~inorganic anion exchanger activity	6	0.103199	0.0458743	102187078, 102188747, 102174654, 102173046, 108633287, 102171168	2455	13	15148	2.84781	1	1	1
GOTERM_MF_DIRECT	GO:0044877~macromolecular complex binding	30	0.515996	0.0497286	102169900, 102185094, 102188463, 102181434, 102182743, 102168873, 102187833, 108634245, 102178546, 108636085, 102174263, 102182019, 102171274, 102174880, 106502669, 102172225, 102180719, 102168405, 102186352, 102183187, 102189485, 102179361, 102184658, 102187668, 102170809, 102181839, 102171984, 102184091, 102177646, 102177205	2455	132	15148	1.40233	1	1	1
GOTERM_MF_DIRECT	GO:1990837~sequence-specific double-stranded DNA binding	38	0.653595	0.0498707	102191578, 106503351, 102169903, 106503493, 102183394, 102178020, 102183278, 102185438, 102178381, 108637954, 108638126, 102180343, 108637135, 102173570, 102177136, 102178103, 102172220, 102180997, 108634041, 106503934, 102191382, 102173338, 102172004, 102170902, 108635905, 102188516, 108634434, 102184773, 102182512, 102169954, 108635641, 102178779, 102181239, 102179749, 106503844, 102175448, 102…	2455	175	15148	1.33983	1	1	1
GOTERM_MF_DIRECT	GO:0004478~methionine adenosyltransferase activity	3	0.0515996	0.0702121	102170704, 102176585, 102189734	2455	3	15148	6.17026	1	1	1
GOTERM_MF_DIRECT	GO:0090555~phosphatidylethanolamine-translocating ATPase activity	3	0.0515996	0.0702121	102178625, 102185888, 102173860	2455	3	15148	6.17026	1	1	1
GOTERM_MF_DIRECT	GO:0005337~nucleoside transmembrane transporter activity	3	0.0515996	0.0702121	102172869, 102176758, 100861005	2455	3	15148	6.17026	1	1	1
GOTERM_MF_DIRECT	GO:0050431~transforming growth factor beta binding	7	0.120399	0.0734814	102188621, 102175990, 102178659, 102176628, 102169304, 102190794, 102172587	2455	19	15148	2.27326	1	1	1
GOTERM_MF_DIRECT	GO:0005198~structural molecule activity	25	0.429997	0.073936	102168858, 102188960, 108635156, 102176161, 102189579, 102179515, 100861381, 102174403, 102175613, 102177119, 102178207, 102178787, 102188896, 102190437, 102183241, 102174707, 102180076, 102183744, 102181028, 100861179, 102178033, 102175327, 102170379, 102176457, 102191456	2455	110	15148	1.40233	1	1	1
GOTERM_MF_DIRECT	GO:0071949~FAD binding	10	0.171999	0.0742242	102174178, 102187685, 102188176, 102172084, 102172859, 102190790, 102191395, 102179224, 102177788, 102178522	2455	33	15148	1.86978	1	1	1
GOTERM_MF_DIRECT	GO:0005085~guanyl-nucleotide exchange factor activity	40	0.687994	0.0753891	106503770, 102188389, 102185132, 102185299, 102187410, 102189277, 102182162, 102168551, 102183970, 102184845, 102187979, 102182348, 102180324, 102180762, 102183115, 102180614, 106503917, 102177375, 102168351, 102191384, 106502301, 102176802, 106503830, 102173333, 102170660, 102190014, 102173015, 102173718, 106502252, 102171957, 102169398, 108633361, 102182730, 102177401, 102181634, 102175341, 106…	2455	192	15148	1.28547	1	1	1
GOTERM_MF_DIRECT	GO:0015631~tubulin binding	8	0.137599	0.0804863	102191779, 100861155, 102185041, 102185284, 102187428, 102181792, 102188523, 102179436	2455	24	15148	2.05675	1	1	1
GOTERM_MF_DIRECT	GO:0004298~threonine-type endopeptidase activity	6	0.103199	0.0811803	102181449, 102184819, 102189234, 102187058, 102175796, 102176996	2455	15	15148	2.46811	1	1	1
GOTERM_MF_DIRECT	GO:0000981~RNA polymerase II transcription factor activity, sequence-specific DNA binding	33	0.567595	0.0837303	106503295, 108638469, 102190907, 108634004, 102168994, 102168854, 102184202, 108637135, 108636245, 102181114, 102182246, 102177136, 102172220, 108634041, 102175836, 106503773, 102191366, 102178741, 106503157, 102173938, 102190755, 108635905, 102179582, 102187006, 108634434, 102184773, 102169954, 102178213, 102181954, 102179749, 106503844, 102190584, 102179126	2455	155	15148	1.31367	1	1	1
GOTERM_MF_DIRECT	GO:0019900~kinase binding	15	0.257998	0.0858658	102190800, 102187428, 102187803, 102180362, 102168543, 102178645, 102171480, 102174243, 102186408, 102189382, 102176836, 102186091, 102171325, 102177614, 102177646	2455	59	15148	1.56871	1	1	1
GOTERM_MF_DIRECT	GO:0004725~protein tyrosine phosphatase activity	22	0.378397	0.0880943	102169957, 102168613, 102184296, 102174718, 102190737, 102176938, 102191826, 102183250, 102178150, 102168445, 102187423, 102169118, 102187214, 102181007, 102179903, 102184935, 102170223, 102186181, 102180719, 102191586, 102179213, 102174520	2455	96	15148	1.41402	1	1	1
GOTERM_MF_DIRECT	GO:0004175~endopeptidase activity	4	0.0687994	0.0892784	102186078, 102171917, 102175216, 102183854	2455	7	15148	3.52587	1	1	1
GOTERM_MF_DIRECT	GO:0047372~acylglycerol lipase activity	4	0.0687994	0.0892784	100860801, 102185932, 102186912, 102174994	2455	7	15148	3.52587	1	1	1
GOTERM_CC_DIRECT	GO:0005794~Golgi apparatus	121	2.08118	0.000167213	102170931, 102170018, 102185513, 102184941, 102183179, 102169389, 102182243, 102181792, 102180862, 102183854, 102184026, 102174624, 102178783, 102171475, 102191503, 102171514, 102181163, 102187780, 102175838, 102170824, 102178394, 102181287, 102168564, 102186579, 102182889, 102175162, 102179363, 102174911, 102187381, 102172458, 102172299, 102190389, 102169526, 102176938, 102186108, 102181056, 102…	2714	533	16416	1.37314	0.128577	0.137616	0.137616
GOTERM_CC_DIRECT	GO:0005765~lysosomal membrane	34	0.584795	0.00140108	102187595, 108635156, 102183179, 102169562, 100861025, 102189799, 102188963, 108637894, 102185754, 102177016, 102175135, 102176448, 102176326, 102178984, 102188577, 102186773, 102170806, 102171757, 102189285, 102172869, 102177162, 102187702, 102184658, 102186912, 102187028, 102181368, 102180951, 102182528, 102171382, 102172472, 102185418, 102181759, 102184091, 102176555	2714	119	16416	1.72818	0.684594	0.404862	0.404862
GOTERM_CC_DIRECT	GO:0005887~integral component of plasma membrane	85	1.46199	0.0014758	102170738, 102187771, 102168932, 102175509, 102170931, 102176282, 102181156, 102182486, 102169587, 102187539, 102181352, 102189834, 108634223, 100861005, 102180223, 102174780, 102180535, 102177174, 102178980, 106503654, 102187024, 102170904, 102185683, 102190659, 102189002, 100750232, 102187989, 102185689, 102185888, 102189408, 102186654, 102169458, 108633287, 102189766, 102182411, 102188799, 102…	2714	373	16416	1.37838	0.703434	0.404862	0.404862
GOTERM_CC_DIRECT	GO:0005829~cytosol	439	7.55074	0.00451572	102172318, 102182120, 102181392, 102169389, 102181035, 108636640, 102168292, 102174988, 102176923, 102172568, 102172684, 102171595, 102174862, 102181287, 102168286, 102180076, 102182138, 102170151, 102168281, 102186728, 102175844, 102172458, 102175721, 102172213, 102181053, 102183353, 102187833, 100861103, 106501896, 102176705, 102175614, 102174644, 102174883, 102184572, 102174529, 102189902, 102…	2714	2380	16416	1.11569	0.975883	0.92911	0.92911
GOTERM_CC_DIRECT	GO:0016323~basolateral plasma membrane	34	0.584795	0.00721482	102187078, 102170931, 102171900, 102174913, 102176282, 102181892, 102181156, 102185757, 102188747, 102186269, 102171809, 102187833, 100861005, 102182956, 102186816, 102177770, 102185090, 102174868, 102174986, 102177119, 102188896, 102169837, 100860927, 100860761, 102184750, 102186579, 108633287, 102187722, 102170074, 108636372, 102176758, 102173046, 102177468, 102171168	2714	131	16416	1.56988	0.997418	1	1
GOTERM_CC_DIRECT	GO:0030016~myofibril	8	0.137599	0.00957636	102180624, 102181426, 108637637, 102181869, 102180648, 102181716, 102180345, 102180883	2714	16	16416	3.02432	0.999636	1	1
GOTERM_CC_DIRECT	GO:0071797~LUBAC complex	4	0.0687994	0.0158049	102176829, 102169684, 102181220, 102191244	2714	4	16416	6.04864	0.999998	1	1
GOTERM_CC_DIRECT	GO:0005763~mitochondrial small ribosomal subunit	8	0.137599	0.0196924	102179977, 102171723, 102178024, 108637181, 102183030, 102191386, 102170087, 102184476	2714	18	16416	2.68828	1	1	1
GOTERM_CC_DIRECT	GO:0016605~PML body	18	0.309598	0.0322709	102188387, 102188288, 102174948, 102181335, 108636199, 102186139, 102184356, 102181653, 102172251, 102178465, 102177100, 102188690, 102188074, 102176318, 102178552, 102177646, 102173973, 102175752	2714	65	16416	1.67501	1	1	1
GOTERM_CC_DIRECT	GO:0099055~integral component of postsynaptic membrane	7	0.120399	0.036334	102187695, 102186352, 102172494, 102186507, 102187065, 102186912, 102187843	2714	16	16416	2.64628	1	1	1
GOTERM_CC_DIRECT	GO:0016607~nuclear speck	60	1.03199	0.0486146	102185271, 102176281, 102180782, 102186923, 102187214, 100861126, 102174780, 100861320, 102178465, 102185902, 102184935, 102176482, 102175470, 102189195, 102171950, 102189152, 102172047, 102184273, 108638619, 102171956, 102188395, 102185967, 102179921, 102179880, 102173229, 102170593, 102179126, 102175568, 102184482, 102191812, 102188003, 102175290, 102183353, 102182743, 102186983, 102185379, 102…	2714	290	16416	1.25144	1	1	1
GOTERM_CC_DIRECT	GO:0000786~nucleosome	27	0.464396	0.0502306	108633414, 108633412, 102180587, 108633554, 100861366, 102189238, 102172745, 102178586, 106503499, 102171353, 102175730, 102188114, 102183280, 102184572, 102191748, 102181383, 102184017, 108634231, 108636012, 102185049, 102189503, 102181912, 102178257, 102182848, 108633916, 102178870, 102186170	2714	114	16416	1.43257	1	1	1
GOTERM_CC_DIRECT	GO:0005882~intermediate filament	16	0.275198	0.0606156	102168858, 102176161, 102180076, 100860930, 102187503, 102179515, 102178443, 100861182, 100861381, 100861173, 106501743, 102175327, 102175613, 102178207, 102190069, 102176457	2714	60	16416	1.61297	1	1	1
GOTERM_CC_DIRECT	GO:0005871~kinesin complex	4	0.0687994	0.0609082	102174462, 102173138, 102187797, 102172378	2714	6	16416	4.03242	1	1	1
GOTERM_CC_DIRECT	GO:0030057~desmosome	7	0.120399	0.0629338	102187443, 100860927, 102189583, 102180076, 102176987, 102172301, 102175785	2714	18	16416	2.35225	1	1	1
GOTERM_CC_DIRECT	GO:0030126~COPI vesicle coat	5	0.0859993	0.0678578	100861396, 102190437, 102171008, 102174707, 102183744	2714	10	16416	3.02432	1	1	1
GOTERM_CC_DIRECT	GO:0005789~endoplasmic reticulum membrane	77	1.32439	0.0722311	102168218, 102171508, 102189750, 102176519, 102168374, 102182243, 102187853, 102180862, 102182004, 102170380, 100861084, 102190790, 102178980, 102174624, 106502247, 102181709, 102171671, 102176326, 102191348, 102185364, 102190811, 108637647, 102190537, 102170823, 102184074, 102170747, 102181760, 100861413, 102176050, 102184398, 102180511, 102168403, 102182726, 102183218, 100861254, 102188828, 102…	2714	392	16416	1.18813	1	1	1
GOTERM_CC_DIRECT	GO:0045179~apical cortex	3	0.0515996	0.0728936	106502681, 102186420, 108633200	2714	3	16416	6.04864	1	1	1
GOTERM_CC_DIRECT	GO:0014069~postsynaptic density	20	0.343997	0.0744114	102185002, 100860943, 102184123, 102186007, 102180223, 102189602, 102179505, 102170096, 102178036, 102184208, 102178739, 106501788, 102180505, 102176803, 102171644, 102171363, 102190872, 102190168, 102172301, 102174862	2714	82	16416	1.47528	1	1	1
GOTERM_CC_DIRECT	GO:0005666~DNA-directed RNA polymerase III complex	5	0.0859993	0.0931262	102190767, 102168682, 102183651, 102186665, 100861003	2714	11	16416	2.74938	1	1	1
GOTERM_CC_DIRECT	GO:0044322~endoplasmic reticulum quality control compartment	5	0.0859993	0.0931262	102183714, 102171307, 102189253, 102184398, 102188888	2714	11	16416	2.74938	1	1	1
GOTERM_CC_DIRECT	GO:0031981~nuclear lumen	5	0.0859993	0.0931262	102187892, 102188395, 102190609, 102184239, 102184156	2714	11	16416	2.74938	1	1	1
GOTERM_CC_DIRECT	GO:0031090~organelle membrane	26	0.447196	0.0935846	102179490, 102190767, 102181096, 102176939, 102183030, 102184365, 108636640, 102177555, 102179613, 102179977, 102171390, 102175614, 102187101, 102185142, 102187640, 102184870, 102171757, 102191408, 102186417, 102189602, 102170371, 102177244, 102176639, 102176316, 102172851, 102175621	2714	116	16416	1.35573	1	1	1
GOTERM_CC_DIRECT	GO:0060170~ciliary membrane	10	0.171999	0.0961743	102189730, 102187201, 102189684, 102175646, 102189150, 102168830, 102190596, 102181028, 102175885, 102190796	2714	34	16416	1.77901	1	1	1
GOTERM_BP_DIRECT	GO:0001938~positive regulation of endothelial cell proliferation	16	0.275198	0.0018151	102186388, 106503372, 102184232, 102173628, 102186108, 102186921, 102185438, 100860793, 100860789, 100860831, 102178244, 102176581, 102190161, 102172910, 102179675, 102173357	2308	41	13743	2.32371	0.999792	1	1
GOTERM_BP_DIRECT	GO:0051291~protein heterooligomerization	6	0.103199	0.00206618	102170704, 102182093, 102172241, 102169531, 102180246, 102186269	2308	7	13743	5.10386	0.999936	1	1
GOTERM_BP_DIRECT	GO:0006865~amino acid transport	11	0.189198	0.00349558	102174111, 108634701, 102168759, 108634722, 102191549, 102186969, 102175435, 108633279, 108634642, 102173224, 102169897	2308	24	13743	2.72915	1	1	1
GOTERM_BP_DIRECT	GO:0060395~SMAD protein signal transduction	14	0.240798	0.00536757	102173938, 102180045, 102188539, 100860793, 100860789, 102184982, 102187104, 102186139, 100860831, 102179921, 102180336, 102177903, 102172733, 102172205	2308	37	13743	2.25306	1	1	1
GOTERM_BP_DIRECT	GO:0042572~retinol metabolic process	7	0.120399	0.00818752	102189996, 102170823, 102180835, 102183532, 102170554, 102186703, 102181105	2308	12	13743	3.47346	1	1	1
GOTERM_BP_DIRECT	GO:0032786~positive regulation of DNA-templated transcription, elongation	6	0.103199	0.0092116	102186045, 102188099, 102181839, 102186142, 106502488, 102184365	2308	9	13743	3.96967	1	1	1
GOTERM_BP_DIRECT	GO:0042475~odontogenesis of dentin-containing tooth	14	0.240798	0.0111107	100860914, 102171716, 102190677, 102172808, 102168318, 108637658, 102183278, 102187006, 100860789, 100860831, 102172340, 102180208, 102177903, 102190550	2308	40	13743	2.08408	1	1	1
GOTERM_BP_DIRECT	GO:0007020~microtubule nucleation	7	0.120399	0.0130708	102181315, 102173579, 102187802, 102185513, 102188627, 102182347, 102183567	2308	13	13743	3.20627	1	1	1
GOTERM_BP_DIRECT	GO:0035914~skeletal muscle cell differentiation	13	0.223598	0.0146868	102190017, 102174905, 108637538, 108637637, 102185438, 102184267, 102180343, 102182786, 108635641, 100861252, 102179009, 102190281, 102179861	2308	37	13743	2.09212	1	1	1
GOTERM_BP_DIRECT	GO:0030336~negative regulation of cell migration	21	0.361197	0.0152255	106503440, 102190269, 102185560, 100860818, 102183251, 102186328, 102183001, 102186912, 102169304, 102189768, 102184356, 102181631, 102175498, 100861254, 102175590, 102184091, 102178408, 102177119, 102174520, 102190168, 102178787	2308	73	13743	1.71294	1	1	1
GOTERM_BP_DIRECT	GO:0002064~epithelial cell development	6	0.103199	0.0159	102186074, 102174031, 100860927, 102189132, 102177085, 102190550	2308	10	13743	3.5727	1	1	1
GOTERM_BP_DIRECT	GO:0051260~protein homooligomerization	26	0.447196	0.0159861	102186046, 102188341, 102185471, 102180287, 102188248, 102177311, 102174263, 102172241, 102184836, 102177593, 102169361, 106502669, 102190375, 102172266, 102178427, 102177237, 102190796, 102182093, 102187322, 102185480, 102170987, 102169531, 102189902, 102189727, 102169395, 102173767	2308	97	13743	1.59605	1	1	1
GOTERM_BP_DIRECT	GO:0032868~response to insulin	11	0.189198	0.0160461	102182528, 102182351, 102175172, 102178739, 102174913, 102178680, 102189174, 102171621, 102181145, 100861239, 102170197	2308	29	13743	2.25861	1	1	1
GOTERM_BP_DIRECT	GO:0007341~penetration of zona pellucida	4	0.0687994	0.0165241	102173938, 102172770, 100860927, 102168383	2308	4	13743	5.95451	1	1	1
GOTERM_BP_DIRECT	GO:0046330~positive regulation of JNK cascade	19	0.326797	0.0215793	102187771, 102169328, 102185222, 102170987, 102181145, 102191608, 102186668, 102184789, 102185604, 102168873, 102187833, 102188644, 102180333, 100861232, 102169582, 106501756, 102178565, 102170375, 102174883	2308	66	13743	1.71418	1	1	1
GOTERM_BP_DIRECT	GO:0006468~protein phosphorylation	15	0.257998	0.0272693	102184185, 102188350, 102181584, 102184139, 102183921, 102172251, 102177544, 108636085, 102179009, 102175498, 102191191, 102173093, 102175448, 102173206, 102177735	2308	49	13743	1.82281	1	1	1
GOTERM_BP_DIRECT	GO:1900017~positive regulation of cytokine production involved in inflammatory response	8	0.137599	0.0290136	102186154, 102181208, 100861232, 102177694, 100861391, 102170987, 102183463, 102174883	2308	19	13743	2.50716	1	1	1
GOTERM_BP_DIRECT	GO:0001934~positive regulation of protein phosphorylation	20	0.343997	0.0297851	102169605, 106503295, 102190426, 102181392, 102186108, 102187802, 102181692, 100861013, 102184005, 102180348, 100861232, 100860770, 102173093, 102181418, 102176529, 106501886, 102184091, 102177119, 102178787, 102173026	2308	73	13743	1.63137	1	1	1
GOTERM_BP_DIRECT	GO:0031113~regulation of microtubule polymerization	5	0.0859993	0.0313708	102179944, 106504042, 102186024, 106502666, 102179436	2308	8	13743	3.72157	1	1	1
GOTERM_BP_DIRECT	GO:0070059~intrinsic apoptotic signaling pathway in response to endoplasmic reticulum stress	10	0.171999	0.0345244	100861254, 102181514, 102171367, 102190790, 102178709, 102173008, 102184398, 102172870, 102173973, 102170562	2308	28	13743	2.12661	1	1	1
GOTERM_BP_DIRECT	GO:0045063~T-helper 1 cell differentiation	4	0.0687994	0.0361643	102171147, 102176912, 102179434, 100861236	2308	5	13743	4.7636	1	1	1
GOTERM_BP_DIRECT	GO:0071716~leukotriene transport	4	0.0687994	0.0361643	102175509, 102178034, 102181156, 102174986	2308	5	13743	4.7636	1	1	1
GOTERM_BP_DIRECT	GO:0040014~regulation of multicellular organism growth	8	0.137599	0.0383426	102186154, 100860838, 100861580, 102172733, 102176603, 102183353, 102170197, 102181963	2308	20	13743	2.3818	1	1	1
GOTERM_BP_DIRECT	GO:0019731~antibacterial humoral response	7	0.120399	0.0389084	108633414, 102181912, 102183280, 102184017, 102182111, 100860761, 102180587	2308	16	13743	2.6051	1	1	1
GOTERM_BP_DIRECT	GO:0033138~positive regulation of peptidyl-serine phosphorylation	18	0.309598	0.042094	108638619, 102186099, 106503372, 102185689, 102181287, 102183267, 102185602, 102185318, 102181434, 102180223, 100861254, 100861232, 102175362, 102176836, 102177449, 102174787, 102177646, 102170375	2308	66	13743	1.62396	1	1	1
GOTERM_BP_DIRECT	GO:1901998~toxin transport	10	0.171999	0.0428397	100861396, 102178036, 102176572, 102179284, 102171367, 102179363, 102168991, 102181352, 102185663, 102174696	2308	29	13743	2.05328	1	1	1
GOTERM_BP_DIRECT	GO:0031333~negative regulation of protein complex assembly	9	0.154799	0.0462718	108638619, 102186420, 102188531, 102191291, 102174529, 102178552, 102186983, 102174787, 102180410	2308	25	13743	2.14362	1	1	1
GOTERM_BP_DIRECT	GO:0030513~positive regulation of BMP signaling pathway	11	0.189198	0.0476969	102190677, 102185094, 102178244, 102177474, 102187010, 102172733, 100860789, 102191553, 102185025, 102169304, 100860953	2308	34	13743	1.92646	1	1	1
GOTERM_BP_DIRECT	GO:0001952~regulation of cell-matrix adhesion	5	0.0859993	0.0490981	100861252, 102169848, 100861254, 102174031, 102185604	2308	9	13743	3.30806	1	1	1
GOTERM_BP_DIRECT	GO:0006110~regulation of glycolytic process	5	0.0859993	0.0490981	102175135, 100861391, 102171621, 102173180, 102189528	2308	9	13743	3.30806	1	1	1
GOTERM_BP_DIRECT	GO:0006611~protein export from nucleus	7	0.120399	0.0518379	102188247, 102170931, 102178133, 102174905, 102188482, 102188182, 102179995	2308	17	13743	2.45186	1	1	1
GOTERM_BP_DIRECT	GO:0051044~positive regulation of membrane protein ectodomain proteolysis	6	0.103199	0.0524682	102187024, 102191447, 102168910, 100861232, 102185585, 106503654	2308	13	13743	2.74823	1	1	1
GOTERM_BP_DIRECT	GO:0003009~skeletal muscle contraction	6	0.103199	0.0524682	102180624, 102184803, 102181869, 100861283, 102181716, 102181818	2308	13	13743	2.74823	1	1	1
GOTERM_BP_DIRECT	GO:0032007~negative regulation of TOR signaling	8	0.137599	0.0623638	102191713, 102186333, 102185418, 100861391, 102178739, 102184091, 102169233, 100860943	2308	22	13743	2.16527	1	1	1
GOTERM_BP_DIRECT	GO:0008333~endosome to lysosome transport	10	0.171999	0.063249	102188410, 100860818, 102173093, 106503407, 102181418, 102171984, 102182970, 108637277, 102175986, 102185754	2308	31	13743	1.92081	1	1	1
GOTERM_BP_DIRECT	GO:0021930~cerebellar granule cell precursor proliferation	4	0.0687994	0.0634084	102178646, 102174804, 102187428, 102185025	2308	6	13743	3.96967	1	1	1
GOTERM_BP_DIRECT	GO:0016188~synaptic vesicle maturation	4	0.0687994	0.0634084	102186188, 102172616, 102169575, 102187803	2308	6	13743	3.96967	1	1	1
GOTERM_BP_DIRECT	GO:0042596~fear response	4	0.0687994	0.0634084	102187024, 102176244, 102191647, 108634223	2308	6	13743	3.96967	1	1	1
GOTERM_BP_DIRECT	GO:2000271~positive regulation of fibroblast apoptotic process	4	0.0687994	0.0634084	102171716, 106501913, 100861579, 102190550	2308	6	13743	3.96967	1	1	1
GOTERM_BP_DIRECT	GO:0032091~negative regulation of protein binding	15	0.257998	0.0667804	102188531, 102171917, 102184232, 102187152, 102183273, 102185318, 102186983, 100861159, 102174243, 102178659, 102187519, 102172870, 102177646, 102172587, 102173962	2308	55	13743	1.62396	1	1	1
GOTERM_BP_DIRECT	GO:0061512~protein localization to cilium	7	0.120399	0.0670841	102191557, 102188258, 102169361, 102187802, 108633350, 102185025, 102180027	2308	18	13743	2.31564	1	1	1
GOTERM_BP_DIRECT	GO:0007219~Notch signaling pathway	20	0.343997	0.068579	102190545, 106503295, 102185013, 102187185, 102180396, 108633372, 102185025, 102189768, 102183479, 102187514, 102188523, 100860831, 102186039, 102189679, 102177474, 102174031, 102180406, 106501743, 102173344, 102190653	2308	80	13743	1.48863	1	1	1
GOTERM_BP_DIRECT	GO:0043129~surfactant homeostasis	6	0.103199	0.070686	102186907, 100861360, 102183542, 102188539, 102188526, 102190983	2308	14	13743	2.55193	1	1	1
GOTERM_BP_DIRECT	GO:0001836~release of cytochrome c from mitochondria	6	0.103199	0.070686	102185230, 102189930, 100861254, 102184935, 102171367, 102170562	2308	14	13743	2.55193	1	1	1
GOTERM_BP_DIRECT	GO:0043113~receptor clustering	5	0.0859993	0.0712301	102180190, 102184208, 102188144, 102172115, 102176714	2308	10	13743	2.97725	1	1	1
GOTERM_BP_DIRECT	GO:0010564~regulation of cell cycle process	5	0.0859993	0.0712301	106503295, 102172121, 102177075, 102182970, 102185192	2308	10	13743	2.97725	1	1	1
GOTERM_BP_DIRECT	GO:0016064~immunoglobulin mediated immune response	5	0.0859993	0.0712301	102185560, 102170987, 102176382, 106503773, 102174883	2308	10	13743	2.97725	1	1	1
GOTERM_BP_DIRECT	GO:0030047~actin modification	3	0.0515996	0.0750572	102172493, 108633232, 102176687	2308	3	13743	5.95451	1	1	1
GOTERM_BP_DIRECT	GO:0051205~protein insertion into membrane	3	0.0515996	0.0750572	102170181, 102172007, 102174657	2308	3	13743	5.95451	1	1	1
GOTERM_BP_DIRECT	GO:0010724~regulation of definitive erythrocyte differentiation	3	0.0515996	0.0750572	102187519, 102171037, 102174102	2308	3	13743	5.95451	1	1	1
GOTERM_BP_DIRECT	GO:0060197~cloacal septation	3	0.0515996	0.0750572	102175498, 102190550, 100860789	2308	3	13743	5.95451	1	1	1
GOTERM_BP_DIRECT	GO:0046294~formaldehyde catabolic process	3	0.0515996	0.0750572	102186197, 102187988, 102182321	2308	3	13743	5.95451	1	1	1
GOTERM_BP_DIRECT	GO:0030334~regulation of cell migration	13	0.223598	0.0839059	102168932, 102189897, 102190810, 106504042, 102171801, 102185604, 102185445, 102181147, 102182528, 102173781, 102179749, 102177440, 102173037	2308	47	13743	1.64699	1	1	1
GOTERM_BP_DIRECT	GO:0021915~neural tube development	7	0.120399	0.0846551	102168932, 102185761, 102170931, 102176471, 100861039, 102185017, 102184456	2308	19	13743	2.19377	1	1	1
GOTERM_BP_DIRECT	GO:0090303~positive regulation of wound healing	7	0.120399	0.0846551	102179569, 102187024, 102186668, 102170379, 102180950, 102178787, 100861214	2308	19	13743	2.19377	1	1	1
GOTERM_BP_DIRECT	GO:0019915~lipid storage	7	0.120399	0.0846551	102178127, 102179270, 102180045, 102174038, 102173266, 102171595, 100861225	2308	19	13743	2.19377	1	1	1
GOTERM_BP_DIRECT	GO:0006487~protein N-linked glycosylation	7	0.120399	0.0846551	102177696, 100860927, 102173958, 102182243, 102177669, 100860963, 102185445	2308	19	13743	2.19377	1	1	1
GOTERM_BP_DIRECT	GO:0007030~Golgi organization	14	0.240798	0.0850721	102184362, 106503372, 102170806, 102176728, 102187802, 102185513, 108633200, 102177311, 100861132, 102178625, 102178922, 102174392, 102177669, 102172378	2308	52	13743	1.60314	1	1	1
GOTERM_BP_DIRECT	GO:0050830~defense response to Gram-positive bacterium	15	0.257998	0.0857079	108633414, 102183280, 102190537, 102183186, 102170987, 102185480, 102184017, 102178908, 102180587, 102187833, 102181912, 100861232, 102177263, 102178885, 102174883	2308	57	13743	1.56698	1	1	1
GOTERM_BP_DIRECT	GO:0010804~negative regulation of tumor necrosis factor-mediated signaling pathway	6	0.103199	0.0919144	102187771, 102185222, 102179903, 102169582, 102175569, 102177449	2308	15	13743	2.3818	1	1	1
GOTERM_BP_DIRECT	GO:0007389~pattern specification process	6	0.103199	0.0919144	100860914, 108633766, 102185761, 102184208, 102186328, 102184773	2308	15	13743	2.3818	1	1	1
GOTERM_BP_DIRECT	GO:0001707~mesoderm formation	8	0.137599	0.0938219	102172808, 102185094, 108637538, 102177903, 102182243, 102186736, 102189150, 102172684	2308	24	13743	1.98484	1	1	1
GOTERM_BP_DIRECT	GO:0000083~regulation of transcription involved in G1/S transition of mitotic cell cycle	4	0.0687994	0.0974202	102176620, 102184829, 102177085, 102181047	2308	7	13743	3.40257	1	1	1
GOTERM_BP_DIRECT	GO:0045839~negative regulation of mitotic nuclear division	4	0.0687994	0.0974202	102178187, 102168496, 102177903, 100860789	2308	7	13743	3.40257	1	1	1
GOTERM_BP_DIRECT	GO:0043583~ear development	4	0.0687994	0.0974202	102171716, 102170738, 100861254, 102189723	2308	7	13743	3.40257	1	1	1
GOTERM_BP_DIRECT	GO:0048667~cell morphogenesis involved in neuron differentiation	4	0.0687994	0.0974202	102177474, 102174429, 102180045, 102172387	2308	7	13743	3.40257	1	1	1
GOTERM_BP_DIRECT	GO:0006977~DNA damage response, signal transduction by p53 class mediator resulting in cell cycle arrest	4	0.0687994	0.0974202	102176639, 102183569, 102183854, 102173973	2308	7	13743	3.40257	1	1	1
GOTERM_BP_DIRECT	GO:0008210~estrogen metabolic process	5	0.0859993	0.0975452	102186023, 102170823, 102170554, 102173713, 102191377	2308	11	13743	2.70659	1	1	1
GOTERM_BP_DIRECT	GO:1902236~negative regulation of endoplasmic reticulum stress-induced intrinsic apoptotic signaling pathway	5	0.0859993	0.0975452	102171307, 102181056, 102188888, 102172870, 102177646	2308	11	13743	2.70659	1	1	1
GOTERM_BP_DIRECT	GO:0032469~endoplasmic reticulum calcium ion homeostasis	5	0.0859993	0.0975452	100861254, 102181056, 102188888, 102172870, 102173973	2308	11	13743	2.70659	1	1	1
GOTERM_BP_DIRECT	GO:0048026~positive regulation of mRNA splicing, via spliceosome	5	0.0859993	0.0975452	102169837, 108634041, 102189195, 102170653, 102176879	2308	11	13743	2.70659	1	1	1
GOTERM_BP_DIRECT	GO:0031018~endocrine pancreas development	5	0.0859993	0.0975452	106503295, 102180336, 102179824, 102191080, 102174031	2308	11	13743	2.70659	1	1	1
GOTERM_BP_DIRECT	GO:0045332~phospholipid translocation	5	0.0859993	0.0975452	102175374, 102177770, 102187889, 102185888, 102173860	2308	11	13743	2.70659	1	1	1
GOTERM_BP_DIRECT	GO:0007274~neuromuscular synaptic transmission	5	0.0859993	0.0975452	102190269, 102171362, 102169575, 102181818, 102182147	2308	11	13743	2.70659	1	1	1

## Sheet: GO_C3
Category	Term	Count	%	PValue	Genes	List Total	Pop Hits	Pop Total	Fold Enrichment	Bonferroni	Benjamini	FDR
GOTERM_MF_DIRECT	GO:0005096~GTPase activator activity	68	0.805401	5.00829e-06	102191435, 102187378, 102173924, 102177370, 102184425, 102184306, 102186007, 102186567, 102171470, 102171274, 102172128, 102190034, 102174862, 102179953, 102173818, 102186374, 102186575, 102188476, 102190536, 102190735, 102174429, 102183540, 100861013, 102187027, 102180871, 102181289, 102181048, 102181436, 102174274, 102182646, 102180948, 102187183, 102190389, 102186584, 102172619, 102184363, 102…	4242	148	15148	1.64071	0.0100063	0.00658124	0.00656485
GOTERM_MF_DIRECT	GO:0005126~cytokine receptor binding	27	0.319792	8.49135e-06	108636628, 108637839, 102187477, 108636625, 108636626, 108636627, 108636620, 100860850, 108636621, 108636623, 108635455, 102180761, 108635454, 100861164, 102174842, 108636617, 108634976, 108636618, 108635503, 102180392, 102180492, 108636616, 108635000, 108634973, 102179668, 102179943, 108633160	4242	43	15148	2.24223	0.0169062	0.00658124	0.00656485
GOTERM_MF_DIRECT	GO:0005125~cytokine activity	63	0.74618	1.12524e-05	100861208, 102181595, 102186643, 108638068, 102181435, 102182764, 102176641, 100861164, 102175912, 102186892, 108634976, 108635503, 102180392, 102171712, 102182135, 102185602, 100860960, 102169895, 108636634, 108634973, 102189208, 100860886, 108633243, 102178514, 102180548, 108633160, 100861293, 102190023, 108636628, 108636629, 108637839, 102179292, 108636625, 108636626, 108636627, 102180281, 108…	4242	137	15148	1.64212	0.0223415	0.00658124	0.00656485
GOTERM_MF_DIRECT	GO:0044877~macromolecular complex binding	61	0.722492	1.311e-05	102169900, 102188463, 102179593, 102185877, 108637139, 102182523, 102169225, 102178546, 108636085, 102174263, 102176882, 102171274, 102180975, 102180737, 102171356, 102179037, 102175632, 102168405, 102183187, 102189485, 102170349, 102186338, 102181044, 102169975, 102187668, 102176256, 102181839, 102185716, 102189719, 102170831, 102172573, 102179688, 102185094, 102171648, 102180643, 102184366, 102…	4242	132	15148	1.65022	0.0259817	0.00658124	0.00656485
GOTERM_MF_DIRECT	GO:0042802~identical protein binding	328	3.88488	1.83555e-05	102185871, 102188341, 102168738, 102179075, 102183453, 102184789, 102187016, 102182488, 102181279, 102168290, 102173771, 102177694, 102175714, 106501993, 102185192, 102170263, 102175710, 102171595, 102173896, 100860804, 102170826, 102188478, 102189202, 102187141, 102189562, 102179086, 102169817, 102185645, 102189207, 102184673, 102169137, 102179646, 102177586, 102171362, 102182928, 102182806, 102…	4242	964	15148	1.21501	0.0361872	0.00737158	0.00735323
GOTERM_MF_DIRECT	GO:0000978~RNA polymerase II core promoter proximal region sequence-specific DNA binding	138	1.63449	8.39944e-05	102190545, 102179072, 102181392, 102186328, 108636367, 102180186, 102182887, 102182006, 102189439, 102186169, 100860876, 102168854, 102180102, 102181279, 102180336, 102178421, 102177693, 102172040, 102173018, 102178661, 102174500, 106503773, 102191366, 102175557, 102191367, 102174102, 102173411, 102184672, 108638419, 102182770, 102186219, 102189966, 102180349, 102184829, 102184549, 102170036, 102…	4242	370	15148	1.33187	0.155211	0.0281101	0.0280401
GOTERM_MF_DIRECT	GO:1990837~sequence-specific double-stranded DNA binding	71	0.840933	0.000381732	102169946, 106503493, 102169823, 106503173, 102184349, 102185438, 102178381, 102185834, 102177170, 108634344, 108637135, 102179877, 102183925, 102173570, 102178103, 102176882, 102185705, 106503934, 102173338, 102188180, 102171793, 102170902, 102185880, 106503582, 102188079, 102170788, 102168805, 108635905, 108637406, 102182570, 106502050, 102190936, 102169050, 102179845, 106502979, 102169252, 102…	4242	175	15148	1.44879	0.53544	0.109502	0.10923
GOTERM_MF_DIRECT	GO:0005179~hormone activity	41	0.485609	0.000456599	102168738, 102188120, 100860838, 108637755, 108638229, 100860794, 102181435, 108636085, 102176101, 102191080, 102182514, 102173832, 102175912, 102189251, 106501993, 102191068, 102171652, 102185321, 100860907, 102170965, 102182597, 100860960, 102180394, 102180175, 100861277, 100861299, 108633784, 100750237, 102182555, 102181465, 102178091, 100861230, 102175460, 102188608, 102176053, 100861250, 102…	4242	89	15148	1.64505	0.600308	0.114606	0.114321
GOTERM_MF_DIRECT	GO:0001227~transcriptional repressor activity, RNA polymerase II transcription regulatory region sequence-specific binding	79	0.935686	0.000551811	102190545, 102172917, 102188542, 108637539, 108636367, 102180144, 102183893, 102182887, 100860876, 102183335, 100861042, 102191042, 102190273, 102178661, 102191089, 102177658, 102191367, 102173411, 102190017, 102172808, 102189001, 108637528, 102186416, 102169894, 102185207, 102173180, 102184829, 102175242, 102184549, 102185957, 102176130, 102168483, 102184827, 106503988, 102176658, 102178552, 102…	4242	201	15148	1.40351	0.669894	0.123115	0.122809
GOTERM_MF_DIRECT	GO:0042803~protein homodimerization activity	173	2.04903	0.000856298	102184020, 108633812, 102175270, 102182243, 102169304, 102187019, 100861042, 102176246, 102174222, 102171591, 102176762, 102175557, 102170661, 102171476, 102174862, 102173411, 102168206, 102184397, 102187702, 102181288, 102187429, 102170708, 100846984, 102189723, 102173700, 106503668, 102179122, 102170314, 102174236, 102173267, 102171485, 102172573, 102191655, 102189213, 108637637, 102187033, 102…	4242	500	15148	1.23555	0.820967	0.171945	0.171516
GOTERM_MF_DIRECT	GO:0005543~phospholipid binding	25	0.296103	0.00205143	102171529, 102189930, 102172616, 100860994, 102184569, 102183970, 102184306, 102178966, 102175275, 102176042, 102181848, 102179037, 102174500, 102179357, 102191300, 102176072, 102186219, 102189768, 102187887, 102169072, 102174670, 102181436, 102188074, 102170314, 106502794	4242	50	15148	1.78548	0.983812	0.333453	0.332622
GOTERM_MF_DIRECT	GO:0003682~chromatin binding	97	1.14888	0.00228662	102184143, 102179072, 102181151, 102187097, 102181279, 102179877, 102178546, 102180336, 102186719, 102170301, 102174500, 102174589, 102170826, 102181041, 102188198, 106502050, 102187428, 102176491, 102179919, 102182651, 108634296, 102187429, 102186219, 102180349, 102184829, 102181839, 102171642, 102177869, 102177988, 102173387, 102172213, 102174114, 102172617, 102183475, 102184202, 102169247, 102…	4242	266	15148	1.30219	0.989916	0.333453	0.332622
GOTERM_MF_DIRECT	GO:0000977~RNA polymerase II regulatory region sequence-specific DNA binding	46	0.54483	0.0023286	102170836, 102191831, 102187591, 108637539, 102179053, 102177193, 102188646, 102180365, 102182521, 102183335, 100861042, 102178402, 102177032, 102174260, 102172028, 102170301, 102191089, 102177658, 102191766, 102189445, 106503241, 102170826, 108637669, 102189001, 102182152, 102189385, 102187428, 102183541, 102169199, 102184977, 102168422, 102189865, 102168468, 102170590, 102180127, 102179406, 102…	4242	110	15148	1.49331	0.990733	0.333453	0.332622
GOTERM_MF_DIRECT	GO:0000981~RNA polymerase II transcription factor activity, sequence-specific DNA binding	61	0.722492	0.00241407	102185153, 102191831, 102189594, 102187296, 108638469, 102168854, 102183578, 100860952, 108637135, 102181279, 102183925, 102185705, 102173018, 106503773, 102191366, 102179753, 102168805, 108635905, 102190936, 102189966, 102169414, 102187940, 100861257, 102169050, 102179406, 102181954, 102169252, 106502655, 106502413, 102190582, 102190342, 102190584, 102179126, 102170352, 102170836, 102187795, 102…	4242	155	15148	1.40534	0.992198	0.333453	0.332622
GOTERM_MF_DIRECT	GO:0005509~calcium ion binding	202	2.39251	0.00249093	102169825, 102169702, 102173527, 102179075, 102174060, 102185758, 102188900, 102183698, 102169028, 102177697, 102175275, 102173898, 102174868, 102171359, 102179873, 102173895, 102190796, 102171916, 102189202, 102188915, 100860800, 102183348, 102181289, 102178678, 102191070, 102171002, 100860935, 102170711, 102185094, 102168717, 102175176, 102171130, 102171252, 102169361, 102191660, 102174404, 102…	4242	606	15148	1.19032	0.993316	0.333453	0.332622
GOTERM_MF_DIRECT	GO:0019900~kinase binding	28	0.331636	0.00265984	102186485, 102172917, 102187099, 102184723, 102182977, 102169162, 102177614, 102177713, 102176601, 102177337, 102178326, 102182890, 102189384, 108636539, 102181001, 102187428, 102175061, 102187803, 102168543, 102174079, 102176836, 102186091, 102171325, 102173988, 102173685, 102171485, 102188070, 102177646	4242	59	15148	1.69469	0.995243	0.33381	0.332979
GOTERM_MF_DIRECT	GO:0001228~transcriptional activator activity, RNA polymerase II transcription regulatory region sequence-specific binding	118	1.39761	0.00523482	102186328, 102180186, 102182006, 102186169, 108634344, 102182521, 102179877, 102178421, 102177693, 102170301, 102178661, 102174500, 102175557, 102174102, 102173411, 102189445, 102184672, 108638419, 102187428, 102182770, 102180349, 102184829, 102179406, 102173700, 102170036, 102176779, 100860919, 102177988, 102179887, 108637637, 102186866, 102191817, 102188406, 102183991, 102188646, 102182786, 102…	4242	340	15148	1.23933	0.999974	0.618325	0.616785
GOTERM_MF_DIRECT	GO:0005085~guanyl-nucleotide exchange factor activity	71	0.840933	0.00632636	106503770, 102188389, 102187410, 102183970, 102187979, 102184024, 102185433, 108636442, 102180338, 102182917, 102178660, 102176802, 102173333, 102190079, 106502252, 102171916, 102180150, 102188870, 102171957, 102168443, 102189969, 108633361, 102186655, 102181634, 102177540, 102176010, 102177428, 102177824, 102172018, 106503784, 102172773, 102171529, 102168515, 102185132, 102184363, 102191734, 106…	4242	192	15148	1.32051	0.999997	0.705741	0.703984
GOTERM_MF_DIRECT	GO:0043621~protein self-association	22	0.260571	0.00786652	102187488, 102187185, 102170987, 102184085, 102181392, 102185601, 102189319, 102180263, 108637646, 102181324, 102182216, 102180255, 108633200, 102169512, 102179559, 102182977, 106503208, 102188280, 102174800, 102178552, 102190375, 102170375	4242	46	15148	1.70785	1	0.831367	0.829297
GOTERM_MF_DIRECT	GO:0030246~carbohydrate binding	44	0.521142	0.0108017	102185274, 102184087, 102187672, 102170997, 102185733, 102181651, 102183410, 102182106, 102180785, 102188844, 102186125, 102169206, 100861223, 102188900, 102189615, 102180882, 102180520, 102174188, 102180339, 106503912, 102175798, 102170783, 102173433, 102190996, 108633865, 102174906, 102187542, 102173958, 102174628, 102180072, 102178031, 102168484, 108638256, 102181324, 102185368, 102181218, 102…	4242	112	15148	1.40288	1	1	0.998007
GOTERM_MF_DIRECT	GO:0046983~protein dimerization activity	57	0.675115	0.0123726	102169946, 102183491, 102190504, 108637538, 102170812, 102186169, 100861003, 102188229, 102168854, 102183578, 100861042, 102173570, 102180336, 108638462, 102174260, 102173018, 106502961, 100860908, 102174701, 102177658, 102183090, 102176203, 102174904, 108637528, 102183426, 102179406, 102182526, 102181954, 106502979, 108635819, 102177988, 102187079, 108637637, 102168994, 102188600, 102189018, 102…	4242	153	15148	1.33036	1	1	0.998007
GOTERM_MF_DIRECT	GO:0061629~RNA polymerase II sequence-specific DNA binding transcription factor binding	46	0.54483	0.0147248	102190248, 102188542, 102176938, 102189594, 102186328, 102186866, 100861223, 102182688, 100861042, 102170063, 100861363, 102168371, 100860792, 102174260, 108637271, 102171973, 102188280, 102175557, 102174102, 102184175, 102186154, 102172808, 106504031, 102174804, 102190739, 102183004, 102181188, 102183442, 102185207, 102183426, 102181864, 102185423, 102180349, 102179624, 102174472, 100861375, 102…	4242	120	15148	1.36887	1	1	0.998007
GOTERM_MF_DIRECT	GO:0019904~protein domain specific binding	52	0.615895	0.0156036	102188542, 102170931, 102181196, 102185834, 102181792, 100861048, 102178667, 102171591, 102178945, 102183409, 102174984, 102191685, 102173016, 102173379, 102173619, 102182570, 102175838, 102186338, 102179646, 102175442, 102178357, 102184827, 102178750, 102174833, 102179887, 102185451, 102170119, 102184480, 102176062, 102186624, 102184723, 102183998, 102181336, 100861302, 102182657, 102178047, 102…	4242	139	15148	1.3359	1	1	0.998007
GOTERM_MF_DIRECT	GO:0030971~receptor tyrosine kinase binding	20	0.236883	0.0166914	102170926, 102184188, 102169956, 102184353, 102170119, 102177271, 102183772, 102185934, 102186655, 102169798, 102183434, 106501979, 102183516, 102179903, 102180406, 102176824, 102185291, 102177449, 102172212, 102177743	4242	43	15148	1.66091	1	1	0.998007
GOTERM_MF_DIRECT	GO:0003713~transcription coactivator activity	53	0.627739	0.0176747	102188189, 108634149, 102189430, 102183493, 102169344, 102175270, 102186847, 100860991, 100861288, 102184982, 102184267, 102182006, 102181625, 102175795, 102168371, 102178386, 106501832, 102187928, 102184816, 102176688, 102171834, 102184470, 102186295, 102190739, 102187429, 102180076, 102174155, 102174354, 102169494, 102185519, 102170831, 102172212, 102176852, 102191812, 102183475, 102173118, 102…	4242	143	15148	1.3235	1	1	0.998007
GOTERM_MF_DIRECT	GO:0008409~5'-3' exonuclease activity	6	0.0710648	0.0212642	102168405, 102184452, 102182173, 106502290, 102185510, 102177963	4242	7	15148	3.06082	1	1	0.998007
GOTERM_MF_DIRECT	GO:0019901~protein kinase binding	99	1.17257	0.0223976	102184020, 102170931, 102171746, 102190308, 102184426, 102181275, 102180102, 102182400, 102171471, 102176483, 102184936, 102178828, 102178783, 102173016, 102173379, 102185000, 102171999, 102178709, 102183589, 102183859, 102173781, 102178552, 102189698, 102184283, 102180643, 102168435, 102179899, 102175057, 102179019, 102182932, 102187707, 102173438, 102188499, 102184175, 102191407, 102183085, 102…	4242	293	15148	1.20657	1	1	0.998007
GOTERM_MF_DIRECT	GO:0001784~phosphotyrosine binding	17	0.20135	0.0253675	102189677, 102170926, 102186140, 102171746, 102190308, 102177271, 102184349, 102188824, 102187209, 102188710, 102176695, 102180601, 102183977, 102184329, 102170356, 102176802, 102177428	4242	36	15148	1.68629	1	1	0.998007
GOTERM_MF_DIRECT	GO:0005524~ATP binding	416	4.92716	0.0254298	102184661, 102185871, 102179195, 102185877, 102182002, 102181156, 102184426, 102181159, 102181158, 102168292, 102171471, 102169021, 106501756, 102176803, 102174986, 102183460, 102187702, 102185888, 100861337, 102169015, 102169019, 102186853, 102171362, 102169132, 102170159, 102171485, 102174633, 102172213, 102174872, 102180081, 102181173, 102181171, 102181172, 102187836, 102182385, 102185895, 102…	4242	1370	15148	1.08432	1	1	0.998007
GOTERM_MF_DIRECT	GO:0019899~enzyme binding	56	0.663271	0.0280921	102174937, 102175906, 102183097, 100861125, 102181312, 102176246, 102179598, 106503410, 102172808, 102185602, 102187746, 102186219, 102185884, 102179646, 108637680, 102183814, 102184829, 100861011, 102179849, 102181759, 102177020, 102170593, 102179688, 102170557, 102172859, 102182102, 102186624, 102186305, 102173191, 102181770, 102185412, 102178204, 102179779, 102180953, 102177430, 102178847, 102…	4242	156	15148	1.28188	1	1	0.998007
GOTERM_MF_DIRECT	GO:0000287~magnesium ion binding	70	0.829089	0.0282986	102186443, 102191713, 102189750, 102179907, 100860751, 102184349, 102168457, 102181037, 102178625, 102191283, 102171678, 102173178, 102173379, 102185045, 102186134, 102184397, 102189485, 102191825, 102183460, 102185041, 102185601, 102180792, 102181320, 102178709, 102178907, 102168201, 102184398, 102187668, 102180431, 100860962, 102174475, 102175242, 102190860, 102173860, 102185692, 102185451, 102…	4242	201	15148	1.24362	1	1	0.998007
GOTERM_MF_DIRECT	GO:0004715~non-membrane spanning protein tyrosine kinase activity	17	0.20135	0.0333528	102186140, 102188484, 102182890, 102171746, 102184810, 102184349, 102180263, 102176695, 102183977, 102182806, 102184639, 102188492, 102177814, 102173735, 102170159, 102175249, 102177986	4242	37	15148	1.64071	1	1	0.998007
GOTERM_MF_DIRECT	GO:0046875~ephrin receptor binding	12	0.14213	0.0338747	102178126, 102185242, 102170926, 102182890, 102184639, 102168298, 102170356, 102184349, 102183496, 102168502, 106502352, 102177853	4242	23	15148	1.86311	1	1	0.998007
GOTERM_MF_DIRECT	GO:0071889~14-3-3 protein binding	10	0.118441	0.0393602	102188499, 102179746, 102173122, 102178135, 102178759, 102189340, 102177869, 102176228, 102172398, 102176667	4242	18	15148	1.98387	1	1	0.998007
GOTERM_MF_DIRECT	GO:0001221~transcription cofactor binding	10	0.118441	0.0393602	102172808, 102184549, 102168371, 102179351, 102186295, 102190482, 102171667, 102186219, 102174500, 102174102	4242	18	15148	1.98387	1	1	0.998007
GOTERM_MF_DIRECT	GO:0051015~actin filament binding	44	0.521142	0.042075	102188367, 102188225, 100860979, 102188740, 102187630, 102179075, 102191618, 102184204, 102187978, 102184349, 102169101, 102183316, 102180225, 102179537, 102178047, 102169060, 102175493, 102181869, 102177493, 102177372, 106502887, 102174943, 102176966, 102176601, 106503410, 102177479, 102191524, 102171910, 102183042, 102170108, 102180490, 102182970, 108634335, 108633200, 102187007, 102180624, 102…	4242	121	15148	1.29853	1	1	0.998007
GOTERM_MF_DIRECT	GO:0047498~calcium-dependent phospholipase A2 activity	6	0.0710648	0.0437207	102172088, 102172230, 102188141, 106503219, 102169892, 102191660	4242	8	15148	2.67822	1	1	0.998007
GOTERM_MF_DIRECT	GO:0070412~R-SMAD binding	11	0.130285	0.0437338	102170381, 102169293, 102191605, 102185759, 102182069, 102174669, 102183004, 102177072, 102170375, 102185423, 102181158	4242	21	15148	1.8705	1	1	0.998007
GOTERM_MF_DIRECT	GO:0005245~voltage-gated calcium channel activity	12	0.14213	0.0471004	102189138, 102170294, 102189785, 102174706, 102187163, 102189285, 102176592, 106503290, 102182201, 102168441, 102184834, 102173101	4242	24	15148	1.78548	1	1	0.998007
GOTERM_MF_DIRECT	GO:0015026~coreceptor activity	9	0.106597	0.0512665	102182747, 102169070, 102175362, 102173062, 102170124, 102189905, 102189616, 102169304, 102183457	4242	16	15148	2.00866	1	1	0.998007
GOTERM_MF_DIRECT	GO:0031625~ubiquitin protein ligase binding	71	0.840933	0.0554381	102186044, 102169900, 102188740, 102188264, 102190747, 108633812, 102185877, 102177095, 102169067, 102181159, 100861288, 102171591, 102177850, 102178945, 102191284, 102183809, 102172562, 102173973, 102176688, 102173379, 102187429, 102182975, 102169137, 102178357, 102169293, 100861254, 102182928, 106501723, 102170751, 102171642, 102173988, 102175569, 106503387, 102168910, 102169328, 106504040, 108…	4242	211	15148	1.2016	1	1	0.998007
GOTERM_MF_DIRECT	GO:0004674~protein serine/threonine kinase activity	77	0.911998	0.0565787	102188027, 102189157, 102168659, 102173967, 102174419, 102180263, 102185318, 102169624, 102175993, 102176487, 102173496, 102175590, 102191283, 106503614, 102176803, 102171678, 102191045, 102173333, 102175799, 102190431, 106502252, 102185045, 102183187, 102189485, 102170623, 102172847, 102178709, 102169015, 102168520, 102185604, 102180356, 102184398, 102187668, 102178314, 102174475, 102178478, 100…	4242	231	15148	1.19032	1	1	0.998007
GOTERM_MF_DIRECT	GO:0008270~zinc ion binding	208	2.46358	0.0566245	102186165, 102179191, 102188467, 102169823, 102181151, 102181278, 102178546, 102178789, 102173096, 106503378, 102174500, 102173893, 102189445, 102170826, 102188478, 102170706, 102190778, 102171917, 102168288, 102185641, 102185884, 102187940, 102185522, 102174871, 102180508, 102185519, 102178793, 102172216, 102181174, 102186866, 102189218, 102183479, 102186501, 102179779, 102181602, 102168393, 102…	4242	673	15148	1.10365	1	1	0.998007
GOTERM_MF_DIRECT	GO:0050431~transforming growth factor beta binding	10	0.118441	0.0566583	102189962, 102188621, 102178659, 102172418, 106501844, 102176628, 102169304, 102176712, 102172587, 102172212	4242	19	15148	1.87945	1	1	0.998007
GOTERM_MF_DIRECT	GO:0004623~phospholipase A2 activity	11	0.130285	0.0605977	102176399, 102187595, 102176672, 102188141, 102168220, 102169892, 102182111, 102189517, 108633234, 102169567, 102178699	4242	22	15148	1.78548	1	1	0.998007
GOTERM_MF_DIRECT	GO:0008083~growth factor activity	42	0.497454	0.0643991	102181070, 102185177, 100861208, 102179273, 100860838, 102189099, 108633176, 102168896, 108637113, 102184367, 106501979, 102176101, 102178244, 102169384, 102186718, 102170202, 102171599, 102191364, 102174268, 102186892, 102189962, 102185860, 102184232, 102170206, 106502270, 102185645, 100860960, 100861277, 102169777, 100860789, 102169556, 102169798, 108638494, 102178514, 106502912, 100861293, 100…	4242	118	15148	1.27102	1	1	0.998007
GOTERM_MF_DIRECT	GO:0004712~protein serine/threonine/tyrosine kinase activity	77	0.911998	0.0671083	102184020, 102188027, 102186443, 102188220, 102175906, 102171746, 102183251, 102184349, 102188824, 102189319, 102184426, 102180263, 102169225, 102176762, 102173496, 102171471, 102191283, 106501756, 106503614, 102177814, 102173735, 102171678, 102191045, 102173333, 102173379, 102185045, 102183187, 102182890, 102172847, 102185689, 102169015, 102184398, 102174475, 102176695, 100861297, 102183977, 102…	4242	233	15148	1.1801	1	1	0.998007
GOTERM_MF_DIRECT	GO:0001540~beta-amyloid binding	17	0.20135	0.0680219	102185560, 102183271, 102187089, 102186352, 102185162, 102190918, 102169975, 102169206, 102168873, 102183478, 102179305, 102180953, 102176771, 102177430, 102174052, 102175395, 102170314	4242	40	15148	1.51766	1	1	0.998007
GOTERM_MF_DIRECT	GO:0001006~RNA polymerase III type 3 promoter sequence-specific DNA binding	4	0.0473765	0.0693227	100860902, 102173122, 102169396, 102186087	4242	4	15148	3.57096	1	1	0.998007
GOTERM_MF_DIRECT	GO:0003836~beta-galactoside (CMP) alpha-2,3-sialyltransferase activity	4	0.0473765	0.0693227	102191019, 102180329, 102168794, 102174236	4242	4	15148	3.57096	1	1	0.998007
GOTERM_MF_DIRECT	GO:0005102~receptor binding	45	0.532986	0.0748758	102183391, 102171801, 102183076, 102179351, 108633812, 102185018, 102186624, 102183255, 102184723, 102184866, 102181473, 100861288, 102171152, 102170063, 102172088, 102174889, 102176924, 102170104, 102176768, 102190353, 102177778, 102184053, 102188533, 102186352, 102186154, 102170921, 102185326, 102187669, 102169375, 102183463, 102189900, 102184950, 102186997, 102169259, 100862660, 102178478, 102…	4242	129	15148	1.24568	1	1	0.998007
GOTERM_MF_DIRECT	GO:0050321~tau-protein kinase activity	6	0.0710648	0.0760676	102178314, 102178248, 102178478, 102172847, 102178709, 102187523	4242	9	15148	2.38064	1	1	0.998007
GOTERM_MF_DIRECT	GO:0005178~integrin binding	29	0.34348	0.0784522	102169902, 102191119, 102171801, 102183372, 100860838, 102185733, 102169982, 102178060, 102169863, 102180585, 102176587, 102181229, 102178987, 102175451, 102178047, 102174042, 102178188, 102177814, 102178408, 102176966, 106503440, 102186892, 102190117, 102182890, 100861277, 102169556, 102179669, 102179903, 102172853	4242	78	15148	1.32766	1	1	0.998007
GOTERM_MF_DIRECT	GO:0050681~androgen receptor binding	11	0.130285	0.0811539	102191812, 102174482, 102190703, 102184804, 102172617, 102186295, 102185733, 102173180, 102177646, 102185016, 102181158	4242	23	15148	1.70785	1	1	0.998007
GOTERM_MF_DIRECT	GO:0003684~damaged DNA binding	16	0.189506	0.0841992	102190358, 102185473, 102183790, 102183085, 102185877, 102185834, 102189229, 108637680, 102183814, 102173121, 102182818, 102173071, 102171356, 102170831, 102177614, 102170376	4242	38	15148	1.50356	1	1	0.998007
GOTERM_MF_DIRECT	GO:0017124~SH3 domain binding	22	0.260571	0.0920233	102189115, 102190402, 102185000, 102184353, 102190735, 102191538, 102190308, 102189153, 102186482, 102185372, 102188617, 102184349, 102190829, 102181275, 102183859, 102178445, 102177364, 102184639, 102170356, 102190043, 102178408, 102178774	4242	57	15148	1.37826	1	1	0.998007
GOTERM_MF_DIRECT	GO:0004252~serine-type endopeptidase activity	61	0.722492	0.0948571	102169785, 108638467, 108633178, 102174387, 106501715, 102175078, 102175790, 102173292, 102174944, 102185320, 102187300, 102179086, 102191749, 102184030, 102188314, 102180823, 102174794, 102178999, 102182449, 102174670, 102179409, 102177461, 102177186, 102171568, 102179128, 102170638, 102168758, 102185651, 102182780, 102187990, 102181094, 102174957, 102183994, 102185018, 102184723, 102185218, 102…	4242	184	15148	1.18385	1	1	0.998007
GOTERM_MF_DIRECT	GO:0008022~protein C-terminus binding	39	0.461921	0.0987438	102189138, 102179072, 102186024, 102179051, 102171746, 102179690, 102187033, 102185877, 102186668, 102184349, 102184982, 102168675, 100861125, 102189018, 102182977, 102179297, 102170104, 102173016, 102171630, 102174763, 108633205, 102190358, 102184452, 102182890, 102185106, 102184810, 102187803, 108634511, 102185884, 108633200, 102179646, 102181839, 102189719, 102191370, 102186091, 102174872, 102…	4242	112	15148	1.24346	1	1	0.998007
GOTERM_CC_DIRECT	GO:0005654~nucleoplasm	667	7.90004	3.44516e-08	102180062, 102174858, 102181392, 102182003, 102185877, 102180186, 102181275, 102182006, 100861322, 102183578, 100861323, 102181278, 102184786, 102180069, 102181158, 102181279, 102182367, 102185509, 102171356, 106501873, 102172200, 102170263, 102171352, 102172684, 102174743, 102173411, 102171476, 102174862, 102184672, 102181041, 102176928, 102186735, 102186856, 102184678, 102186737, 102168288, 102…	4644	1989	16416	1.1854	3.57946e-05	3.57952e-05	3.57263e-05
GOTERM_CC_DIRECT	GO:0001725~stress fiber	23	0.272415	0.000210232	102186861, 102172648, 102175906, 102183042, 102187978, 102189847, 102185146, 108638530, 102181234, 102187007, 102182554, 102173472, 102179537, 102182834, 102178047, 102181869, 102178087, 102177814, 102176966, 102191795, 102179435, 102177831, 102177479	4644	39	16416	2.08468	0.196239	0.0548556	0.05475
GOTERM_CC_DIRECT	GO:0005615~extracellular space	226	2.67677	0.000215297	102169825, 100860913, 100861208, 102168738, 102186282, 102184424, 102185756, 106501993, 102170263, 102172442, 102174506, 102180072, 102185645, 102182135, 102168288, 108636634, 102189207, 100860800, 102189208, 108633243, 106503824, 102169925, 102185651, 102185772, 102171801, 102188120, 108635455, 102180761, 108635454, 102175176, 102175293, 102175172, 102178565, 102179775, 102189225, 102170601, 102…	4644	651	16416	1.22716	0.200459	0.0548556	0.05475
GOTERM_CC_DIRECT	GO:0005925~focal adhesion	55	0.651427	0.00024363	102169702, 102188266, 102188740, 102179075, 102187099, 102189153, 102188824, 102178060, 102180225, 102173494, 102171074, 102182834, 102171274, 102189708, 102177372, 102177814, 102174943, 102176966, 102172684, 102184350, 100860848, 102186772, 102182890, 102172648, 102181001, 102181320, 102180032, 102176573, 102183977, 102182646, 102176451, 106501723, 102191795, 102171880, 102176777, 102174433, 102…	4644	125	16416	1.55535	0.223658	0.0548556	0.05475
GOTERM_CC_DIRECT	GO:0005737~cytoplasm	621	7.35521	0.000263983	102185750, 102179195, 102181150, 102183575, 102184667, 102185756, 102185877, 102182123, 102184425, 102183453, 102184789, 102186847, 102183452, 102181275, 100861322, 102183578, 102171591, 106502606, 102171472, 100861320, 102186719, 102185509, 102173898, 102174744, 102176802, 102174500, 102174984, 102174982, 102172328, 108637962, 102181288, 102186737, 102180076, 108633361, 108634335, 102185884, 102…	4644	1959	16416	1.12055	0.239907	0.0548556	0.05475
GOTERM_CC_DIRECT	GO:0042383~sarcolemma	25	0.296103	0.00117251	102188740, 102189650, 102185490, 102173902, 102181273, 106503290, 102184468, 102182762, 102178060, 102169305, 102180712, 102175491, 102170263, 102173235, 102178403, 106502252, 102187169, 102187263, 100750232, 102183003, 102172170, 106501743, 102179168, 102174874, 102191378	4644	48	16416	1.84109	0.704461	0.20304	0.202649
GOTERM_CC_DIRECT	GO:0005730~nucleolus	190	2.25038	0.00327107	102185472, 102190269, 102187012, 106502681, 102181151, 102190308, 102179593, 102172715, 102183972, 102185877, 102168577, 102182887, 102183578, 102189953, 102181158, 102173890, 102176487, 102171071, 102186719, 102184816, 102190273, 102171755, 102171352, 102170662, 102189325, 102170788, 102189562, 102186295, 102186856, 102181320, 102174071, 102178392, 102186858, 102168960, 102181285, 108634296, 102…	4644	564	16416	1.19083	0.966767	0.48552	0.484586
GOTERM_CC_DIRECT	GO:0016020~membrane	147	1.74109	0.0044169	102170935, 102185756, 102189319, 102184701, 102190829, 100861321, 102185873, 102168578, 102178149, 102182119, 102171472, 102175395, 102187093, 102189272, 102187092, 102172841, 102172684, 102175798, 102170540, 102172724, 102185645, 102182376, 100860800, 102168686, 102187423, 102186455, 102189689, 108633244, 102176256, 102172170, 102178670, 102188074, 102178671, 102171880, 102178677, 102191658, 102…	4644	428	16416	1.21408	0.989941	0.518488	0.51749
GOTERM_CC_DIRECT	GO:0005829~cytosol	728	8.62253	0.00449123	102179072, 102180062, 102181151, 102181273, 102181392, 102188901, 102180186, 102182006, 102182367, 102168292, 102171471, 102173771, 102170263, 102171352, 102172684, 102171595, 102173893, 102171233, 102174862, 102184672, 102181041, 102186735, 102188914, 102168286, 102184678, 100861337, 102181285, 102183100, 102182132, 102180076, 102169013, 102185641, 102169137, 102183589, 102181048, 102170151, 102…	4644	2380	16416	1.08126	0.990692	0.518488	0.51749
GOTERM_CC_DIRECT	GO:0035371~microtubule plus-end	9	0.106597	0.00640344	102190721, 102186024, 102187261, 102178828, 102184369, 102190383, 102175305, 102188823, 102171630	4644	12	16416	2.65116	0.998737	0.610612	0.609437
GOTERM_CC_DIRECT	GO:0005794~Golgi apparatus	178	2.10826	0.00646461	100860913, 102188464, 102182081, 102184143, 102189279, 102170931, 102184260, 102182085, 102170934, 102183179, 102182243, 102184426, 102181792, 102186203, 102183854, 102184026, 102187899, 102176246, 102174222, 102176487, 102177056, 102191480, 102185629, 102178828, 102191361, 102171236, 102170301, 102178783, 102172200, 106503497, 102190379, 102189047, 108634616, 102187780, 102175838, 102178394, 102…	4644	533	16416	1.18051	0.998816	0.610612	0.609437
GOTERM_CC_DIRECT	GO:0005887~integral component of plasma membrane	128	1.51605	0.00804128	102189279, 102170931, 102190306, 102191637, 102169542, 102184424, 102181156, 102182486, 102181396, 102187539, 102189834, 102183579, 102174981, 102177174, 106503654, 102185640, 102190659, 102185888, 102181288, 102177060, 102189449, 102187822, 102181834, 102173383, 102171362, 102182928, 102174074, 102177581, 102171644, 102177468, 102190843, 102180360, 102181171, 102179010, 102188804, 102186624, 102…	4644	373	16416	1.21304	0.999773	0.696241	0.694901
GOTERM_CC_DIRECT	GO:0090575~RNA polymerase II transcription factor complex	30	0.355324	0.00975569	102170836, 102191831, 102191459, 102186866, 102183991, 100861124, 102186169, 102169247, 102172040, 108637271, 102173118, 102171671, 102174500, 102189445, 102186154, 102172808, 100860906, 102189385, 102183444, 102187428, 102180571, 102186219, 102168468, 102180349, 102174211, 102169494, 102185738, 102170631, 102172212, 102179887	4644	69	16416	1.53691	0.999962	0.779705	0.778204
GOTERM_CC_DIRECT	GO:0030425~dendrite	50	0.592207	0.0124039	102189753, 102186485, 102177095, 102169587, 102180263, 102180500, 102169225, 102181789, 102190190, 102182917, 102178188, 102172161, 102186771, 102169933, 102185002, 102188473, 102172847, 108633163, 102169975, 102175245, 102175088, 102182928, 102176857, 102186490, 102170237, 102175645, 102186583, 102191339, 102185372, 102188804, 102186504, 102168594, 100861268, 102168754, 102178248, 102177355, 102…	4644	130	16416	1.35957	0.999998	0.903694	0.901955
GOTERM_CC_DIRECT	GO:0005768~endosome	43	0.509298	0.0130466	102190984, 102182060, 102188464, 102169901, 102171404, 102174814, 102172617, 102183630, 102183014, 102180224, 102168577, 102187899, 100861362, 102183428, 102176043, 102182859, 102176725, 102171376, 102180190, 102184350, 102171917, 102189384, 102188617, 102169575, 102191828, 102183003, 102180255, 102189723, 102170096, 102169070, 102179429, 102181932, 102185639, 102191393, 102170356, 102171227, 102…	4644	109	16416	1.3945	0.999999	0.903694	0.901955
GOTERM_CC_DIRECT	GO:0005765~lysosomal membrane	46	0.54483	0.0150864	102168338, 102187595, 102188244, 102171509, 102184242, 102189213, 102189793, 100861347, 108635156, 102183179, 102183998, 102169800, 100861025, 102185754, 102175135, 102171470, 102177674, 102187709, 102171136, 102176448, 102176326, 102174048, 100860902, 102188577, 102189785, 102191449, 102170806, 102170008, 102189285, 102181260, 102186119, 102187702, 102184658, 102187028, 102184673, 100861157, 102…	4644	119	16416	1.36643	1	0.944355	0.942537
GOTERM_CC_DIRECT	GO:0030027~lamellipodium	43	0.509298	0.0154514	102169902, 102189897, 100860979, 102183373, 102189153, 102182564, 102178040, 102178060, 102182743, 102185411, 102180225, 102178149, 102179537, 102175795, 102168391, 102169060, 102177011, 102189372, 102173438, 102184081, 102179037, 102174862, 102178403, 102187169, 102168208, 102183187, 102171910, 102190735, 102183042, 102184173, 102191828, 102180056, 102184810, 102181148, 102188798, 102183518, 102…	4644	110	16416	1.38182	1	0.944355	0.942537
GOTERM_CC_DIRECT	GO:0005874~microtubule	63	0.74618	0.018018	102188269, 102181151, 102173805, 102183575, 102183453, 102181234, 102178942, 102182317, 102180974, 102174462, 102175517, 102173138, 106503385, 102191666, 102171999, 102187261, 102184194, 102185041, 102172925, 102190739, 102169652, 108634335, 102183538, 102176573, 102176056, 102176572, 102173267, 102178119, 102172378, 102184042, 102190721, 102190402, 102180081, 106503471, 102187234, 102186228, 102…	4644	173	16416	1.28727	1	0.988666	0.986763
GOTERM_CC_DIRECT	GO:0005856~cytoskeleton	85	1.00675	0.0183645	102170935, 102169902, 102188467, 102169702, 102188102, 106503491, 102189397, 102187099, 102189153, 102184468, 102188824, 102177292, 102180263, 102169305, 102189832, 102181234, 100861121, 102180975, 102177452, 102177011, 102178827, 102177372, 102177814, 102171077, 102190475, 102179435, 102186771, 102186298, 102173857, 102182970, 102189847, 102189969, 108633361, 108634335, 102181886, 102188798, 102…	4644	243	16416	1.23648	1	0.988666	0.986763
GOTERM_CC_DIRECT	GO:0005911~cell-cell junction	35	0.414545	0.0190311	102168438, 102183251, 102186120, 102190308, 102182282, 102184468, 108638601, 102182762, 102183255, 102176587, 102179537, 102171471, 102174768, 102189372, 102178783, 102176601, 102174520, 102178403, 102186231, 102186112, 102187960, 102169637, 102170928, 102186997, 102188710, 102182554, 102183518, 102183859, 102180208, 102191492, 106502976, 102170356, 102173768, 102177428, 102172535	4644	87	16416	1.42208	1	0.988666	0.986763
GOTERM_CC_DIRECT	GO:0031931~TORC1 complex	6	0.0710648	0.022239	100860902, 102173122, 102176233, 102184824, 102180643, 100861036	4644	7	16416	3.0299	1	1	0.999037
GOTERM_CC_DIRECT	GO:0045171~intercellular bridge	27	0.319792	0.0223953	102190469, 102191536, 102189474, 102183475, 102183992, 102185834, 100861223, 102173876, 102181906, 102176448, 102176228, 102178522, 102171476, 102177435, 106503440, 102185000, 102182570, 102182173, 102185284, 102189385, 102186316, 102174210, 100861054, 102182548, 102177068, 102177825, 102172573	4644	64	16416	1.49128	1	1	0.999037
GOTERM_CC_DIRECT	GO:0030426~growth cone	20	0.236883	0.0242553	102191248, 102189698, 102186583, 102187169, 102190536, 102173902, 102187978, 102181148, 102170917, 102183744, 102186997, 102183434, 102179305, 102172690, 102179537, 102178569, 102177068, 102176043, 102174723, 102171365	4644	44	16416	1.60677	1	1	0.999037
GOTERM_CC_DIRECT	GO:0043231~intracellular membrane-bounded organelle	41	0.485609	0.0255128	102186388, 100860758, 102187350, 100861208, 102180360, 102186120, 102185031, 102186228, 102169587, 102183772, 102181396, 102181473, 102183316, 102188006, 102168710, 102186985, 102175772, 102173710, 102171313, 102174965, 102174984, 102171595, 102176865, 102190510, 102189962, 100860848, 102170408, 102191825, 102173857, 102188397, 102183246, 102185801, 102184515, 102183249, 102175860, 102179646, 102…	4644	107	16416	1.35449	1	1	0.999037
GOTERM_CC_DIRECT	GO:0030173~integral component of Golgi membrane	13	0.153974	0.0284516	102185111, 102169449, 102178708, 102183323, 102183992, 102185488, 102180688, 102181932, 102178013, 102180948, 102185705, 102175414, 102177679	4644	25	16416	1.83814	1	1	0.999037
GOTERM_CC_DIRECT	GO:0043197~dendritic spine	19	0.225038	0.0302295	102190985, 102171839, 102185490, 102173902, 106503193, 102187669, 102183630, 102176072, 102187803, 102178060, 102169206, 102186007, 102186997, 102185710, 102176638, 102173438, 102170578, 102191300, 102173379	4644	42	16416	1.59911	1	1	0.999037
GOTERM_CC_DIRECT	GO:0032587~ruffle membrane	22	0.260571	0.0323793	106503770, 102191524, 100860979, 102187960, 102182890, 102188141, 100860994, 102180276, 102183970, 102187979, 102178060, 102188798, 102169072, 102173472, 102176587, 102174079, 102182834, 102181739, 102176263, 102173438, 102177657, 102191300	4644	51	16416	1.52485	1	1	0.999037
GOTERM_CC_DIRECT	GO:0071944~cell periphery	11	0.130285	0.0325081	102175795, 102178569, 102182932, 102172648, 100861250, 102179389, 102181148, 102169403, 102189700, 100846984, 102177435	4644	20	16416	1.94419	1	1	0.999037
GOTERM_CC_DIRECT	GO:0044297~cell body	15	0.177662	0.0332487	102184194, 102183630, 102187347, 102184058, 102180255, 102186337, 102180333, 102177850, 102182317, 102176572, 102169252, 102186816, 102191069, 102177646, 102190069	4644	31	16416	1.71043	1	1	0.999037
GOTERM_CC_DIRECT	GO:0098793~presynapse	28	0.331636	0.0334655	102189698, 102191734, 102173989, 102185372, 102172616, 102181892, 102183630, 102174060, 102181693, 102181258, 102168898, 102168238, 102178966, 102180953, 102186816, 102176042, 102174800, 102190353, 102179357, 102176787, 102178249, 102168603, 102168201, 102173263, 102171665, 102177646, 102178217, 102171025	4644	69	16416	1.43445	1	1	0.999037
GOTERM_CC_DIRECT	GO:0016323~basolateral plasma membrane	48	0.568518	0.0349893	102187078, 102189650, 102170931, 106504040, 102176282, 102181892, 102181156, 102185757, 102187237, 102185499, 102171809, 102189832, 102168578, 102174981, 102182956, 102186816, 102177770, 102182859, 102174868, 102174986, 102174800, 102170561, 102178249, 102185242, 102169837, 108633307, 102191828, 102180056, 102174093, 102181044, 102186159, 102184750, 102183524, 108633287, 102182554, 102182429, 102…	4644	131	16416	1.29522	1	1	0.999037
GOTERM_CC_DIRECT	GO:0031932~TORC2 complex	7	0.0829089	0.0358347	100860902, 102184824, 102184283, 102180643, 102172562, 100861036, 102175632	4644	10	16416	2.47442	1	1	0.999037
GOTERM_CC_DIRECT	GO:0031594~neuromuscular junction	17	0.20135	0.0364978	102182175, 102173109, 102183372, 102168399, 102170928, 102178060, 102186997, 102182488, 102180712, 102178945, 102185309, 102191361, 106503567, 102185291, 102173379, 102171025, 102177732	4644	37	16416	1.62414	1	1	0.999037
GOTERM_CC_DIRECT	GO:0071005~U2-type precatalytic spliceosome	18	0.213194	0.0376698	106502273, 102191007, 102191812, 102186515, 102185967, 102182810, 100861322, 102184951, 102178847, 102184518, 102175470, 102182507, 102173942, 102170169, 102172962, 102173222, 102189060, 102177888	4644	40	16416	1.5907	1	1	0.999037
GOTERM_CC_DIRECT	GO:0005884~actin filament	18	0.213194	0.0478561	100860979, 102182890, 102183042, 102184369, 102169101, 102183316, 100861321, 102182688, 102183859, 102178149, 102178248, 102183977, 102173438, 102174943, 102176966, 102191795, 106502441, 102174048	4644	41	16416	1.5519	1	1	0.999037
GOTERM_CC_DIRECT	GO:0016605~PML body	26	0.307947	0.0486669	102188288, 102188145, 102188387, 102171989, 100861288, 102170542, 102173933, 102183809, 102173973, 102175752, 102185165, 100860902, 102184175, 102184452, 102181285, 102185685, 108636199, 102184356, 102175442, 102169132, 102190482, 102188074, 102176318, 102178552, 102177646, 102176852	4644	65	16416	1.41395	1	1	0.999037
GOTERM_CC_DIRECT	GO:0005739~mitochondrion	186	2.20301	0.0491615	102183291, 100860879, 102185112, 102173929, 102181151, 102189430, 102172715, 102179907, 102171909, 102168457, 102180069, 102170381, 102174462, 102175271, 102179916, 102187928, 102191520, 102175710, 106502288, 102173379, 102171476, 102168603, 102169539, 108633249, 102168327, 102170706, 102181041, 102189681, 102176491, 102184678, 102188116, 102179922, 102188907, 102171367, 102176539, 102179122, 102…	4644	589	16416	1.11628	1	1	0.999037
GOTERM_CC_DIRECT	GO:0032588~trans-Golgi network membrane	12	0.14213	0.0504416	102178966, 102177674, 102191070, 102185946, 102176054, 102191182, 102180329, 108633812, 102177392, 102188538, 102178750, 102183524	4644	24	16416	1.76744	1	1	0.999037
GOTERM_CC_DIRECT	GO:0000794~condensed nuclear chromosome	12	0.14213	0.0504416	108637680, 102179615, 102191427, 102191715, 102189474, 102170557, 102181729, 102182915, 102183492, 102186349, 102183453, 108637277	4644	24	16416	1.76744	1	1	0.999037
GOTERM_CC_DIRECT	GO:0005576~extracellular region	229	2.71231	0.0516935	102169825, 102188900, 102184664, 108636085, 102178789, 102191080, 102169384, 102186718, 102179198, 102171599, 102179086, 102185527, 100861213, 102169259, 100862660, 102182009, 102179409, 102179883, 102188367, 100860935, 102171801, 108637755, 102184569, 102182821, 108637993, 102171493, 102171130, 102175172, 102191660, 102174404, 102178563, 102187391, 102172587, 102173433, 102170965, 102182034, 102…	4644	735	16416	1.10134	1	1	0.999037
GOTERM_CC_DIRECT	GO:0099055~integral component of postsynaptic membrane	9	0.106597	0.0542002	102187695, 102186352, 102177355, 102186507, 102187065, 102170586, 102179992, 102170561, 102187843	4644	16	16416	1.98837	1	1	0.999037
GOTERM_CC_DIRECT	GO:0044232~organelle membrane contact site	5	0.0592207	0.0576354	102169649, 100861010, 102188154, 102178450, 102189151	4644	6	16416	2.94574	1	1	0.999037
GOTERM_CC_DIRECT	GO:0005871~kinesin complex	5	0.0592207	0.0576354	106503385, 102174462, 102173138, 102187797, 102172378	4644	6	16416	2.94574	1	1	0.999037
GOTERM_CC_DIRECT	GO:0030117~membrane coat	5	0.0592207	0.0576354	102173581, 102189213, 102189492, 102183998, 102185655	4644	6	16416	2.94574	1	1	0.999037
GOTERM_CC_DIRECT	GO:0042995~cell projection	24	0.284259	0.0590712	106503471, 102171916, 102190306, 102170986, 102173989, 102189153, 102168441, 102188419, 102169587, 102184810, 102187844, 102180332, 102187305, 108635284, 102174052, 102184714, 102172062, 102177075, 102178670, 102188393, 102177814, 102187183, 102176779, 106503410	4644	60	16416	1.41395	1	1	0.999037
GOTERM_CC_DIRECT	GO:0016363~nuclear matrix	24	0.284259	0.0590712	102184221, 102176908, 102179690, 102186582, 102191728, 102187033, 102188395, 102184239, 100860800, 102169247, 102168425, 102175442, 102179779, 102171471, 102188074, 102171798, 102175569, 102175347, 106501794, 102173973, 102171993, 102171047, 102190884, 102171630	4644	60	16416	1.41395	1	1	0.999037
GOTERM_CC_DIRECT	GO:0010494~cytoplasmic stress granule	21	0.248727	0.0601214	102189665, 102189303, 102188464, 108633313, 102190617, 102175270, 102168741, 100861059, 100861126, 100861302, 102181625, 102178357, 102173122, 102176233, 102182906, 102169097, 102179584, 102174942, 102181918, 102170461, 102170574	4644	51	16416	1.45554	1	1	0.999037
GOTERM_CC_DIRECT	GO:0045121~membrane raft	37	0.438233	0.0644694	102181273, 102171746, 102187990, 102185273, 102184468, 102186504, 102183014, 102178060, 102186326, 102169225, 100861185, 102180953, 102175210, 102177056, 102178188, 102180912, 102184639, 102170124, 102170521, 102174800, 102190375, 102178403, 102191407, 102190759, 102183003, 102169975, 102184255, 102186997, 102176695, 102171164, 100861232, 102170070, 102171265, 102177646, 102174872, 102172212, 102…	4644	101	16416	1.29496	1	1	0.999037
GOTERM_CC_DIRECT	GO:0098978~glutamatergic synapse	65	0.769869	0.0644917	102187695, 102190985, 108634226, 102188223, 102168298, 100861321, 102178060, 102186203, 102189515, 102186007, 102169225, 102168898, 102168578, 102181873, 102178945, 102179992, 102176966, 102172403, 102179357, 102177732, 102174785, 102171839, 102185002, 102190659, 102181161, 102187669, 102191828, 102188711, 102183538, 102185717, 102172577, 102170314, 102176535, 102189698, 102186583, 102173902, 102…	4644	191	16416	1.20297	1	1	0.999037
GOTERM_CC_DIRECT	GO:0005581~collagen trimer	12	0.14213	0.0677195	102181735, 102171260, 102174188, 102185274, 102175187, 102174906, 102169472, 102178089, 102174628, 102178031, 102171347, 102175466	4644	25	16416	1.69674	1	1	0.999037
GOTERM_CC_DIRECT	GO:0016459~myosin complex	18	0.213194	0.0737342	102191524, 102182564, 102178031, 102187978, 102182167, 102178491, 102180624, 102175187, 102168292, 102178047, 102170174, 102175493, 102181869, 102177493, 102175943, 102190253, 102174872, 102179568	4644	43	16416	1.47972	1	1	0.999037
GOTERM_CC_DIRECT	GO:0032993~protein-DNA complex	14	0.165818	0.0905632	102190248, 102186328, 102185877, 102169983, 102183475, 102180076, 102180102, 102180349, 100860792, 102176130, 102170036, 102171671, 102175557, 102174102	4644	32	16416	1.54651	1	1	0.999037
GOTERM_BP_DIRECT	GO:0007565~female pregnancy	32	0.379012	9.8401e-05	108636628, 108636629, 108636625, 108636626, 108636627, 102181595, 100860950, 108636620, 100860850, 108636621, 108636623, 108635455, 102180761, 108635454, 100861164, 102174842, 108636617, 108634976, 108636618, 108635503, 102180392, 102180492, 108636616, 108635000, 108636634, 108634973, 102189208, 100860788, 108633243, 102179668, 102179943, 108633160	4114	57	13743	1.87539	0.475054	0.332727	0.332727
GOTERM_BP_DIRECT	GO:0060041~retina development in camera-type eye	23	0.272415	0.000101627	102168603, 102188367, 102186231, 102188324, 102189314, 102168525, 102190899, 102183372, 108638601, 102189902, 102183881, 102184640, 102183008, 102185664, 100846984, 102182961, 102176345, 102186907, 102184914, 106502976, 102178640, 102170054, 102173662	4114	36	13743	2.13424	0.486029	0.332727	0.332727
GOTERM_BP_DIRECT	GO:0045944~positive regulation of transcription from RNA polymerase II promoter	179	2.1201	0.000523776	102190545, 102187378, 102184143, 102179072, 102181151, 102170931, 102189430, 102181392, 102179593, 102168575, 102183452, 102177170, 100861288, 102169304, 102184267, 102189439, 102183457, 102183578, 102180102, 102181279, 100861042, 102175795, 102171591, 102180336, 102182514, 102176760, 102178386, 102174064, 102186719, 102173018, 102190273, 102191364, 102172601, 102185192, 106503773, 102191366, 102…	4114	483	13743	1.23801	0.967649	0.918053	0.918053
GOTERM_BP_DIRECT	GO:0016477~cell migration	42	0.497454	0.000697219	102172917, 102171801, 102181196, 102187033, 102186120, 102180462, 108637139, 102183316, 102182743, 102185433, 102179537, 102177697, 106501715, 102177814, 102173438, 102176802, 102190034, 102179037, 102189883, 102184353, 102183187, 102182890, 102185746, 102189727, 102180076, 102168502, 102188798, 102180800, 102178478, 102182646, 102170174, 102182806, 100861293, 102182749, 102182705, 102170256, 106…	4114	88	13743	1.59435	0.989618	0.918053	0.918053
GOTERM_BP_DIRECT	GO:0043491~protein kinase B signaling	18	0.213194	0.000701018	102181151, 100860838, 102181392, 102169323, 100860760, 102183249, 102185411, 102180522, 102176378, 102168391, 100861232, 102177068, 102169472, 102191364, 102170054, 102184909, 102177449, 102175632	4114	28	13743	2.14749	0.989873	0.918053	0.918053
GOTERM_BP_DIRECT	GO:0048041~focal adhesion assembly	13	0.153974	0.00138689	102184350, 102173619, 102184363, 102186772, 102182890, 102179075, 102186120, 102188644, 102183518, 102174079, 100861254, 102176966, 102171880	4114	18	13743	2.41262	0.999887	1	1
GOTERM_BP_DIRECT	GO:0051607~defense response to virus	68	0.805401	0.00147212	102181595, 102169982, 108638068, 100861164, 102177495, 102172684, 102171352, 102173377, 106503773, 102179755, 108634976, 108635503, 102180392, 102170349, 102170987, 102185284, 102186779, 108636634, 108634973, 102189208, 102185565, 102185368, 108633243, 100861254, 108633160, 102169097, 102173148, 102172212, 108636628, 108636629, 102185651, 108636625, 108636626, 108636627, 108636620, 100860850, 108…	4114	163	13743	1.3936	0.999935	1	1
GOTERM_BP_DIRECT	GO:0007229~integrin-mediated signaling pathway	33	0.390856	0.00156022	102188484, 102171801, 102177707, 102169982, 102185415, 102177271, 102181695, 102184349, 102178060, 102185499, 100861185, 102176587, 102171074, 102175795, 102178188, 102177814, 102178408, 102178783, 102180190, 102173619, 102186772, 102170227, 102182890, 102169839, 102184810, 102185146, 102184258, 102179669, 102176451, 102174073, 102191175, 102190043, 102177428	4114	67	13743	1.64534	0.999964	1	1
GOTERM_BP_DIRECT	GO:0042593~glucose homeostasis	39	0.461921	0.00271611	102189930, 102171505, 108633538, 100860950, 102177271, 100860794, 108637276, 102184027, 102180102, 102170063, 102180336, 102180535, 102182514, 102172028, 102177713, 102177657, 102175632, 102190697, 102188214, 102186154, 102184672, 102174704, 102183085, 102185601, 102183003, 102181145, 102184058, 102168425, 102187106, 102179903, 102189719, 100861392, 102180907, 102173644, 102186091, 102170730, 102…	4114	85	13743	1.53272	1	1	1
GOTERM_BP_DIRECT	GO:0051898~negative regulation of protein kinase B signaling	19	0.225038	0.00415124	106502021, 102187169, 102171109, 108637803, 102185411, 102186612, 102179900, 102170370, 102177355, 102178032, 102191284, 102174768, 102173712, 102173327, 102177657, 102175557, 102172212, 102178403, 102171201	4114	34	13743	1.86677	1	1	1
GOTERM_BP_DIRECT	GO:0070374~positive regulation of ERK1 and ERK2 cascade	52	0.615895	0.00500342	100860838, 100861326, 102184349, 102188824, 102184789, 102184426, 102168896, 102173178, 102174268, 102186892, 102185560, 102186772, 102184232, 102182890, 102170987, 100860760, 102186612, 102181799, 102176452, 102175362, 102177020, 102170314, 108637839, 102187033, 102186668, 102177271, 102168873, 102187357, 102175293, 102170124, 102170202, 102171973, 102174723, 102174844, 102178565, 102187169, 102…	4114	124	13743	1.40087	1	1	1
GOTERM_BP_DIRECT	GO:0008630~intrinsic apoptotic signaling pathway in response to DNA damage	15	0.177662	0.00581292	102171716, 102189930, 102185411, 100846984, 102188710, 102185798, 100861254, 100861232, 102173121, 102184725, 102181839, 102173018, 102183809, 102177689, 102170562	4114	25	13743	2.00433	1	1	1
GOTERM_BP_DIRECT	GO:0043547~positive regulation of GTPase activity	45	0.532986	0.00586973	102168515, 102172619, 102171529, 102168910, 102185132, 102184363, 102191734, 106503193, 102189175, 102181171, 102185372, 102173628, 102177370, 102186668, 102184425, 102168476, 102185736, 102178060, 102169205, 102186007, 102187558, 102183457, 102180762, 102186567, 102168754, 102178225, 102173152, 102175451, 102172302, 102171975, 102173333, 102174862, 102179953, 102186772, 102168443, 100861013, 102…	4114	105	13743	1.43166	1	1	1
GOTERM_BP_DIRECT	GO:0060326~cell chemotaxis	15	0.177662	0.00916509	102191831, 102185651, 102184353, 102184426, 102187225, 102185411, 102186433, 102169225, 102186655, 102174079, 102171471, 102176451, 102169472, 102191156, 102191685	4114	26	13743	1.92724	1	1	1
GOTERM_BP_DIRECT	GO:0050482~arachidonic acid secretion	15	0.177662	0.00916509	102169713, 102171917, 102188141, 102168220, 102169892, 102189517, 108633234, 102187899, 102172088, 102177355, 102172230, 106503219, 102188084, 102191660, 102178699	4114	26	13743	1.92724	1	1	1
GOTERM_BP_DIRECT	GO:0045893~positive regulation of transcription, DNA-templated	79	0.935686	0.00968286	102187012, 102189235, 102184386, 102172917, 102173967, 102190703, 102178580, 102179351, 100860751, 102168896, 100861288, 102184819, 102176882, 102184737, 102191360, 102178828, 100861283, 102190195, 102191364, 102179753, 102173178, 102177657, 102189962, 102185560, 102170748, 102172889, 102169894, 102183543, 102169777, 102185685, 102184356, 100861330, 100861375, 102184549, 106502413, 102171642, 102…	4114	207	13743	1.27489	1	1	1
GOTERM_BP_DIRECT	GO:0043433~negative regulation of sequence-specific DNA binding transcription factor activity	25	0.296103	0.00971773	102191579, 102188542, 102191659, 102187033, 102183157, 102180144, 102183475, 102188646, 102186147, 102180102, 102173591, 102188719, 102173018, 102171973, 102172701, 102173712, 102176601, 102172808, 102183442, 102172230, 102177165, 102180109, 102178693, 102176779, 102177449	4114	52	13743	1.60603	1	1	1
GOTERM_BP_DIRECT	GO:0048662~negative regulation of smooth muscle cell proliferation	12	0.14213	0.0102922	100860979, 102182977, 102176452, 102173591, 100861293, 100860950, 102185338, 102169991, 102170314, 100861288, 102171430, 100860951	4114	19	13743	2.10982	1	1	1
GOTERM_BP_DIRECT	GO:0050885~neuromuscular process controlling balance	20	0.236883	0.0103452	102170429, 102168603, 102190985, 102188464, 102189067, 102183157, 102184349, 102187803, 102186423, 102186997, 102168831, 102181532, 102182406, 102178569, 102181304, 102182749, 102170720, 102175798, 102170574, 102190510	4114	39	13743	1.7131	1	1	1
GOTERM_BP_DIRECT	GO:0046471~phosphatidylglycerol metabolic process	6	0.0710648	0.0107976	102172088, 102172230, 106503219, 102173435, 102169892, 102168288	4114	6	13743	3.34054	1	1	1
GOTERM_BP_DIRECT	GO:0017185~peptidyl-lysine hydroxylation	7	0.0829089	0.0111279	100861039, 102168374, 102171984, 102188119, 102181534, 102169800, 102181235	4114	8	13743	2.92298	1	1	1
GOTERM_BP_DIRECT	GO:0045648~positive regulation of erythrocyte differentiation	14	0.165818	0.0111965	102170935, 102186374, 102186154, 106504031, 102186186, 102179593, 102169982, 100860960, 102185102, 102174050, 102180737, 102189174, 100860919, 102174102	4114	24	13743	1.94865	1	1	1
GOTERM_BP_DIRECT	GO:0010628~positive regulation of gene expression	96	1.13704	0.0122496	102179072, 108637538, 102181392, 102179593, 100860838, 102186482, 102169025, 102188824, 102178381, 102177170, 100861288, 102183896, 100861240, 102178225, 108636085, 102180535, 100860792, 102179198, 102174982, 106502441, 102186892, 106504031, 102184232, 102168848, 108638419, 102186416, 102180396, 102185689, 100860960, 100860760, 102186219, 102183426, 102189966, 102169414, 102183624, 102184356, 102…	4114	260	13743	1.23343	1	1	1
GOTERM_BP_DIRECT	GO:0035914~skeletal muscle cell differentiation	19	0.225038	0.0126405	102191579, 102190017, 102185464, 102187140, 108637538, 108637637, 102171109, 102183475, 102185438, 102183991, 102184267, 102182786, 102176112, 102190281, 102174260, 102179861, 102176754, 102173422, 102175115	4114	37	13743	1.71541	1	1	1
GOTERM_BP_DIRECT	GO:0031175~neuron projection development	23	0.272415	0.0142821	102170429, 102188223, 102173989, 102168520, 102181011, 102181792, 102170917, 102168686, 102168873, 102183457, 102186249, 102178569, 102175460, 102181839, 102184639, 108637271, 102173700, 102172833, 102177825, 102170314, 102191300, 102178128, 102177039	4114	48	13743	1.60068	1	1	1
GOTERM_BP_DIRECT	GO:0000122~negative regulation of transcription from RNA polymerase II promoter	141	1.67002	0.0164235	102168856, 100860914, 102184143, 102189430, 102179593, 102170813, 100860751, 102190829, 102177170, 102187533, 102180102, 102181158, 102181312, 102176882, 102178267, 102178386, 106503934, 102173018, 102190272, 102170301, 102190273, 102191364, 102175557, 102174102, 102185880, 102184672, 102186051, 102182651, 102187429, 102169414, 102189966, 102185884, 102187940, 102185522, 102169259, 102180349, 102…	4114	401	13743	1.17461	1	1	1
GOTERM_BP_DIRECT	GO:0002062~chondrocyte differentiation	16	0.189506	0.0164598	108637538, 102190869, 108637139, 102177170, 100860789, 102169259, 102181735, 102178402, 102176310, 102182009, 100860792, 102174260, 102189174, 102171665, 102191364, 102179883	4114	30	13743	1.78162	1	1	1
GOTERM_BP_DIRECT	GO:0010595~positive regulation of endothelial cell migration	17	0.20135	0.0189396	102185596, 102172736, 100860818, 102170921, 102185733, 102180144, 102184810, 100860800, 100860789, 102184366, 108637146, 102175176, 102176451, 102171665, 102178880, 102173438, 102190376	4114	33	13743	1.72089	1	1	1
GOTERM_BP_DIRECT	GO:0009408~response to heat	13	0.153974	0.0209518	100860902, 102185490, 100860838, 108637643, 102187347, 102184356, 100861196, 102171382, 102185618, 102168395, 102187093, 102174973, 102173178	4114	23	13743	1.88813	1	1	1
GOTERM_BP_DIRECT	GO:0010667~negative regulation of cardiac muscle cell apoptotic process	8	0.094753	0.0212856	102180349, 102191093, 106502912, 102180527, 102183004, 102171973, 102183475, 102183115	4114	11	13743	2.42949	1	1	1
GOTERM_BP_DIRECT	GO:0030838~positive regulation of actin filament polymerization	16	0.189506	0.0232315	100860902, 102186374, 102168910, 102189153, 102173628, 102184283, 102185602, 102184810, 100861036, 102180332, 102180601, 102184714, 102175293, 102170356, 106503941, 102172128	4114	31	13743	1.72415	1	1	1
GOTERM_BP_DIRECT	GO:0032495~response to muramyl dipeptide	7	0.0829089	0.0249541	102182977, 102177495, 102170987, 102189174, 102173112, 102169137, 102168578	4114	9	13743	2.5982	1	1	1
GOTERM_BP_DIRECT	GO:0060997~dendritic spine morphogenesis	7	0.0829089	0.0249541	102180800, 102186352, 102190985, 102178768, 102171665, 102187803, 102169225	4114	9	13743	2.5982	1	1	1
GOTERM_BP_DIRECT	GO:0032958~inositol phosphate biosynthetic process	7	0.0829089	0.0249541	102186892, 102178224, 102177585, 102187085, 102190716, 102173853, 102185047	4114	9	13743	2.5982	1	1	1
GOTERM_BP_DIRECT	GO:0051896~regulation of protein kinase B signaling	7	0.0829089	0.0249541	102188214, 100860902, 102189719, 102170119, 102184283, 102184366, 102171002	4114	9	13743	2.5982	1	1	1
GOTERM_BP_DIRECT	GO:0048333~mesodermal cell differentiation	7	0.0829089	0.0249541	100860792, 102191175, 100860960, 102181695, 102168575, 102178060, 102185499	4114	9	13743	2.5982	1	1	1
GOTERM_BP_DIRECT	GO:0050709~negative regulation of protein secretion	10	0.118441	0.025205	102176378, 106501715, 102177355, 102188694, 102168848, 100861293, 102188084, 102179783, 102185218, 102170314	4114	16	13743	2.08784	1	1	1
GOTERM_BP_DIRECT	GO:0030220~platelet formation	10	0.118441	0.025205	102168438, 102187169, 102178047, 102183647, 102190308, 102173700, 102177271, 102176857, 102176966, 102174102	4114	16	13743	2.08784	1	1	1
GOTERM_BP_DIRECT	GO:0034446~substrate adhesion-dependent cell spreading	17	0.20135	0.026036	102180190, 102172948, 102182890, 102171999, 102171801, 102181695, 102184349, 102168502, 102180800, 102173781, 102182708, 102170256, 102173438, 106503599, 102170054, 102184909, 102174862	4114	34	13743	1.67027	1	1	1
GOTERM_BP_DIRECT	GO:0042127~regulation of cell proliferation	30	0.355324	0.026459	102191757, 102191459, 102184188, 102171867, 102180641, 102169582, 102190470, 102179198, 102174500, 102174323, 102170627, 102189663, 102170926, 102174806, 100860829, 102189340, 102190639, 102169652, 102177085, 102180571, 102180076, 102169137, 102188798, 100860842, 100860742, 102182528, 102184407, 106502631, 106503005, 102173448	4114	70	13743	1.43166	1	1	1
GOTERM_BP_DIRECT	GO:0010507~negative regulation of autophagy	15	0.177662	0.0285421	102170429, 102186154, 102181151, 102170648, 100860972, 102179819, 102183267, 100860794, 102169067, 100860760, 102185798, 102175242, 102178135, 100861254, 102176228	4114	29	13743	1.72787	1	1	1
GOTERM_BP_DIRECT	GO:0045599~negative regulation of fat cell differentiation	18	0.213194	0.028631	102189367, 102186772, 106504031, 102189430, 102181151, 102170921, 102190938, 102181066, 102169259, 102169293, 106502606, 102173018, 102190064, 102191364, 102175557, 102170375, 102172069, 102174763	4114	37	13743	1.62513	1	1	1
GOTERM_BP_DIRECT	GO:0016242~negative regulation of macroautophagy	5	0.0592207	0.0304839	100860902, 102191426, 102182421, 102183992, 100860951	4114	5	13743	3.34054	1	1	1
GOTERM_BP_DIRECT	GO:0001707~mesoderm formation	13	0.153974	0.030707	102172808, 102172917, 102182190, 102185094, 108637538, 102182234, 102182243, 102169293, 102178945, 102174438, 102173700, 102172684, 102173379	4114	24	13743	1.80946	1	1	1
GOTERM_BP_DIRECT	GO:0002244~hematopoietic progenitor cell differentiation	23	0.272415	0.0308168	100860914, 102184120, 102190308, 102184085, 100860960, 102169323, 102191817, 102188538, 102169623, 102189725, 102183610, 102178964, 102171030, 102174354, 108638044, 102175074, 102191364, 102172145, 102191641, 102172585, 102174457, 102172212, 102177831	4114	51	13743	1.50652	1	1	1
GOTERM_BP_DIRECT	GO:0019229~regulation of vasoconstriction	9	0.106597	0.0309564	102175860, 102175245, 102191407, 102175912, 102176638, 102181288, 102179850, 102177975, 102181465	4114	14	13743	2.14749	1	1	1
GOTERM_BP_DIRECT	GO:0006672~ceramide metabolic process	9	0.106597	0.0309564	102168603, 102185033, 102181946, 102169323, 102190241, 100861080, 102168288, 108637190, 102180489	4114	14	13743	2.14749	1	1	1
GOTERM_BP_DIRECT	GO:0032967~positive regulation of collagen biosynthetic process	9	0.106597	0.0309564	102189962, 102179616, 108637538, 102174669, 102185018, 102183893, 102191364, 100860789, 102178565	4114	14	13743	2.14749	1	1	1
GOTERM_BP_DIRECT	GO:0043537~negative regulation of blood vessel endothelial cell migration	9	0.106597	0.0309564	102186892, 100861232, 106502946, 102180406, 102174669, 102191364, 102174833, 102180076, 102170314	4114	14	13743	2.14749	1	1	1
GOTERM_BP_DIRECT	GO:0051897~positive regulation of protein kinase B signaling	33	0.390856	0.0344953	102180282, 102175906, 100860950, 100861326, 100860794, 102169200, 102169304, 102178060, 102181435, 102180102, 102179877, 102168391, 102175293, 102174768, 102177814, 102174404, 102191364, 102174844, 106503654, 102191068, 102174268, 102186892, 102190755, 102186772, 102182890, 102185602, 100861277, 102186433, 102184432, 102174670, 100861232, 102175362, 102177449	4114	80	13743	1.37797	1	1	1
GOTERM_BP_DIRECT	GO:0007219~Notch signaling pathway	33	0.390856	0.0344953	102191579, 102183491, 102190545, 102185013, 102183479, 102187514, 102188523, 102188719, 102172105, 102191364, 102177713, 102176700, 102190653, 108633348, 106503241, 102189202, 102187185, 102191407, 102190715, 102174191, 102180396, 102169414, 102185025, 102189768, 102186997, 108637184, 108637781, 102174031, 102180406, 102177020, 106501743, 102190980, 102173344	4114	80	13743	1.37797	1	1	1
GOTERM_BP_DIRECT	GO:0031334~positive regulation of protein complex assembly	17	0.20135	0.0349397	102171716, 102188244, 102189981, 102174858, 102184789, 102186125, 100846984, 102182940, 102183518, 102180701, 102178357, 102174054, 102173352, 102191364, 102191200, 102177646, 102170562	4114	35	13743	1.62255	1	1	1
GOTERM_BP_DIRECT	GO:0007507~heart development	34	0.4027	0.0351181	102186960, 102169625, 102185013, 102170931, 102181392, 102185295, 102169047, 102189616, 102177170, 102187159, 102179514, 102178402, 102182536, 102177031, 102170421, 106502004, 102189271, 102188577, 102170926, 102185024, 102187140, 102185689, 102187427, 102189902, 108637007, 102178091, 102184725, 102169472, 102179849, 102175285, 102188250, 102191790, 102190088, 102177328	4114	83	13743	1.36842	1	1	1
GOTERM_BP_DIRECT	GO:0046330~positive regulation of JNK cascade	28	0.331636	0.037129	102169328, 102186668, 102184789, 102186147, 102168873, 102188644, 102169582, 102175293, 106501756, 102174844, 102178407, 102178565, 102185640, 102170987, 102170921, 102181145, 102184810, 102185604, 102188317, 102186997, 102189744, 102180333, 100861232, 102178914, 102191276, 102173267, 102174699, 102170375	4114	66	13743	1.4172	1	1	1
GOTERM_BP_DIRECT	GO:0045987~positive regulation of smooth muscle contraction	8	0.094753	0.0380475	108633307, 102173700, 102183004, 102175912, 102171622, 102168201, 102177975, 102181465	4114	12	13743	2.22703	1	1	1
GOTERM_BP_DIRECT	GO:0043087~regulation of GTPase activity	23	0.272415	0.0386975	102172619, 100860902, 102173924, 102188297, 102184283, 102176072, 102186715, 102184306, 102181792, 102188668, 100861036, 102181532, 102187887, 102183518, 100861196, 102180800, 102181436, 102174274, 102184208, 102177991, 102176802, 102191012, 102174576	4114	52	13743	1.47755	1	1	1
GOTERM_BP_DIRECT	GO:0046716~muscle cell cellular homeostasis	10	0.118441	0.0395884	100861196, 102187488, 102169472, 102189719, 102173700, 102186091, 102184723, 102191364, 102175798, 102187016	4114	17	13743	1.96503	1	1	1
GOTERM_BP_DIRECT	GO:0060339~negative regulation of type I interferon-mediated signaling pathway	10	0.118441	0.0395884	102189149, 102191779, 102179903, 100861319, 102170339, 102190617, 102191284, 102169982, 102172585, 102177710	4114	17	13743	1.96503	1	1	1
GOTERM_BP_DIRECT	GO:0006094~gluconeogenesis	10	0.118441	0.0395884	102179922, 102176111, 102179979, 102174704, 102171407, 102180907, 102170730, 102183991, 102179952, 102184027	4114	17	13743	1.96503	1	1	1
GOTERM_BP_DIRECT	GO:1903078~positive regulation of protein localization to plasma membrane	19	0.225038	0.0402101	102188027, 102187169, 106504040, 102190737, 102184866, 102178060, 102185488, 102185499, 102185411, 102186125, 102182427, 102169060, 100861232, 106502946, 102175362, 102179168, 102191156, 102179730, 102174874	4114	41	13743	1.54806	1	1	1
GOTERM_BP_DIRECT	GO:0070301~cellular response to hydrogen peroxide	16	0.189506	0.0426808	102182890, 100860818, 102187374, 102169323, 102168575, 102184349, 102168201, 102186875, 102171382, 102177202, 102174970, 102182977, 102171471, 102177068, 102175912, 102177646	4114	33	13743	1.61966	1	1	1
GOTERM_BP_DIRECT	GO:0072659~protein localization to plasma membrane	37	0.438233	0.0430319	102168834, 102189115, 102187078, 102188027, 102188223, 102172934, 102169609, 102168914, 106504040, 102175904, 102189616, 102185411, 102175451, 102172363, 102185946, 102184081, 102177417, 102176601, 102177657, 102190796, 102191828, 102168860, 102180076, 102185600, 102186831, 102182923, 102174079, 102175088, 100861232, 102175362, 102189719, 102182749, 102173062, 102171884, 102177406, 102177449, 102…	4114	93	13743	1.32903	1	1	1
GOTERM_BP_DIRECT	GO:0001890~placenta development	13	0.153974	0.0433331	102172307, 102170557, 102189594, 100860794, 102185801, 102169464, 102189889, 102184058, 102178445, 102180336, 102189174, 102171622, 102172543	4114	25	13743	1.73708	1	1	1
GOTERM_BP_DIRECT	GO:0030336~negative regulation of cell migration	30	0.355324	0.0466392	102191810, 102190269, 102185495, 100860818, 102183251, 102170119, 102186120, 102186328, 102169304, 102181555, 102184366, 102181631, 102177355, 102175590, 102174768, 102176824, 102178408, 102191685, 102176688, 102174520, 102178403, 106503440, 102185560, 102170986, 102180691, 102180274, 102189768, 102184356, 100861254, 102189162	4114	73	13743	1.37283	1	1	1
GOTERM_BP_DIRECT	GO:0048546~digestive tract morphogenesis	7	0.0829089	0.0467603	102180800, 102170738, 100861254, 102170202, 102179730, 102181279, 102182554	4114	10	13743	2.33838	1	1	1
GOTERM_BP_DIRECT	GO:0010831~positive regulation of myotube differentiation	7	0.0829089	0.0467603	102179129, 100861395, 100860902, 102187140, 102189719, 102189174, 102173860	4114	10	13743	2.33838	1	1	1
GOTERM_BP_DIRECT	GO:0022010~central nervous system myelination	7	0.0829089	0.0467603	102183281, 108637781, 102186816, 102189067, 102172079, 102181324, 102181279	4114	10	13743	2.33838	1	1	1
GOTERM_BP_DIRECT	GO:0032570~response to progesterone	7	0.0829089	0.0467603	102189962, 100860906, 102176142, 102189162, 102191364, 102171819, 102174763	4114	10	13743	2.33838	1	1	1
GOTERM_BP_DIRECT	GO:0006590~thyroid hormone generation	7	0.0829089	0.0467603	102173295, 102182976, 102172803, 102179593, 106502413, 106502554, 100750237	4114	10	13743	2.33838	1	1	1
GOTERM_BP_DIRECT	GO:0046847~filopodium assembly	7	0.0829089	0.0467603	102188297, 102191175, 102180056, 102175645, 102188798, 102180585, 102174862	4114	10	13743	2.33838	1	1	1
GOTERM_BP_DIRECT	GO:0006471~protein ADP-ribosylation	7	0.0829089	0.0467603	102190248, 102181151, 102169399, 102169686, 102178093, 102171640, 102169116	4114	10	13743	2.33838	1	1	1
GOTERM_BP_DIRECT	GO:0016064~immunoglobulin mediated immune response	7	0.0829089	0.0467603	102170935, 102185560, 102171471, 102170987, 102176382, 106503773, 102180277	4114	10	13743	2.33838	1	1	1
GOTERM_BP_DIRECT	GO:0090023~positive regulation of neutrophil chemotaxis	11	0.130285	0.0471036	102178149, 102185560, 102186374, 102178657, 106502912, 102175293, 102173438, 102174844, 102190023, 102189989, 102190475	4114	20	13743	1.8373	1	1	1
GOTERM_BP_DIRECT	GO:0000209~protein polyubiquitination	23	0.272415	0.0479667	102183282, 102187079, 102190126, 102187488, 102170756, 102170119, 102181551, 102184722, 102187326, 102185699, 102181389, 102170381, 100861254, 102178518, 102178386, 106501723, 102191284, 102171356, 102170542, 102179584, 102173526, 102176688, 102170375	4114	53	13743	1.44967	1	1	1
GOTERM_BP_DIRECT	GO:0070059~intrinsic apoptotic signaling pathway in response to endoplasmic reticulum stress	14	0.165818	0.0480522	102184386, 102178709, 108638625, 102184398, 100846984, 100861254, 102180626, 102171367, 102173008, 102173135, 102175557, 102173973, 102170562, 102173038	4114	28	13743	1.67027	1	1	1
GOTERM_BP_DIRECT	GO:0016485~protein processing	18	0.213194	0.0486989	102189225, 102183281, 102190117, 102182397, 102189229, 102187305, 102178445, 102180688, 102180953, 102175790, 102182749, 102177031, 102177716, 102174404, 102170263, 102190980, 102176700, 102190653	4114	39	13743	1.54179	1	1	1
GOTERM_BP_DIRECT	GO:0006654~phosphatidic acid biosynthetic process	9	0.106597	0.0492539	102173729, 102175275, 102189384, 102175409, 102184173, 102173200, 102171485, 102176556, 102169567	4114	15	13743	2.00433	1	1	1
GOTERM_BP_DIRECT	GO:0010804~negative regulation of tumor necrosis factor-mediated signaling pathway	9	0.106597	0.0492539	102174221, 102189430, 102176176, 102179903, 102169582, 102178518, 102180527, 102175569, 102177449	4114	15	13743	2.00433	1	1	1
GOTERM_BP_DIRECT	GO:0090050~positive regulation of cell migration involved in sprouting angiogenesis	9	0.106597	0.0492539	102186892, 102187169, 106504031, 102187960, 102174051, 102177869, 102184349, 102173036, 100860951	4114	15	13743	2.00433	1	1	1
GOTERM_BP_DIRECT	GO:0043524~negative regulation of neuron apoptotic process	35	0.414545	0.0494992	108633812, 102183179, 102186668, 100861288, 102184982, 102182764, 102171152, 102168391, 108637271, 102170720, 106503654, 102171793, 102176787, 102185683, 102184034, 102171999, 102186878, 102169892, 100860760, 100846984, 102168468, 102169798, 100861196, 100861254, 102184725, 102184208, 106502912, 102176470, 102182749, 102179682, 102189460, 102172855, 102190582, 102173448, 102184909	4114	88	13743	1.32863	1	1	1
GOTERM_BP_DIRECT	GO:0045766~positive regulation of angiogenesis	36	0.426389	0.0498754	102170638, 102186388, 100860818, 102173628, 100860894, 102185338, 102189616, 102169304, 102178060, 100861223, 102168356, 102184366, 100860951, 108636085, 102172481, 102175176, 102178244, 102173238, 102170202, 102190376, 102186154, 106504031, 102170921, 102184810, 102169375, 102168201, 102180076, 102183249, 102178091, 102178657, 102174054, 102173121, 102180406, 102190161, 102174051, 100860919	4114	91	13743	1.32153	1	1	1
GOTERM_BP_DIRECT	GO:0009611~response to wounding	15	0.177662	0.0521939	102189225, 102184232, 102170711, 102183641, 106502606, 102178759, 106502912, 102178849, 100861250, 102177031, 102189162, 102191175, 102191364, 102175799, 102174268	4114	31	13743	1.61639	1	1	1
GOTERM_BP_DIRECT	GO:0010800~positive regulation of peptidyl-threonine phosphorylation	12	0.14213	0.0535803	102178478, 102188027, 102173122, 102185651, 102170921, 102168201, 102191364, 102171678, 102170375, 102186997, 102180585, 102179688	4114	23	13743	1.74289	1	1	1
GOTERM_BP_DIRECT	GO:0030513~positive regulation of BMP signaling pathway	16	0.189506	0.0558214	102185094, 108638419, 102181551, 102169304, 100860789, 102185025, 100860953, 102171030, 102174054, 102172484, 108637781, 102178244, 102177020, 102172733, 102191553, 102171630	4114	34	13743	1.57202	1	1	1
GOTERM_BP_DIRECT	GO:0002262~myeloid cell homeostasis	6	0.0710648	0.0573555	102171716, 100861196, 102183281, 102190716, 102170562, 100846984	4114	8	13743	2.50541	1	1	1
GOTERM_BP_DIRECT	GO:0030214~hyaluronan catabolic process	6	0.0710648	0.0573555	102186892, 102172770, 102182426, 102173238, 102191364, 102172212	4114	8	13743	2.50541	1	1	1
GOTERM_BP_DIRECT	GO:0032924~activin receptor signaling pathway	6	0.0710648	0.0573555	102182747, 102178244, 100861250, 100860960, 102169777, 108637113	4114	8	13743	2.50541	1	1	1
GOTERM_BP_DIRECT	GO:0030901~midbrain development	10	0.118441	0.0586339	102172273, 102174299, 102181954, 108637669, 102176470, 102184470, 102180913, 102186878, 102190582, 108637113	4114	18	13743	1.85586	1	1	1
GOTERM_BP_DIRECT	GO:0001782~B cell homeostasis	10	0.118441	0.0586339	102171716, 100860848, 102186374, 100861254, 102184639, 102172617, 102177031, 102179584, 102170562, 100846984	4114	18	13743	1.85586	1	1	1
GOTERM_BP_DIRECT	GO:0030199~collagen fibril organization	17	0.20135	0.0589943	102190117, 108637538, 102171406, 100861039, 102182397, 102181066, 102181534, 102169800, 102181235, 102183621, 102182697, 102181735, 102169472, 102171984, 102179883, 102178565, 102171265	4114	37	13743	1.53484	1	1	1
GOTERM_BP_DIRECT	GO:0001843~neural tube closure	24	0.284259	0.0600909	102185495, 102187300, 102189153, 102184470, 102183113, 102184349, 100860789, 102182523, 102185664, 102183457, 102178091, 102175861, 102180765, 102175430, 102172450, 102178253, 102182705, 102171555, 102171138, 102191364, 102176700, 106503476, 102191366, 102173379	4114	57	13743	1.40655	1	1	1
GOTERM_BP_DIRECT	GO:0003009~skeletal muscle contraction	8	0.094753	0.0615466	102180624, 102184803, 102181869, 100861283, 102181232, 102187978, 102179168, 100861247	4114	13	13743	2.05572	1	1	1
GOTERM_BP_DIRECT	GO:0070509~calcium ion import	8	0.094753	0.0615466	102185783, 102185429, 102174706, 102187163, 102177581, 102178040, 102171809, 102171047	4114	13	13743	2.05572	1	1	1
GOTERM_BP_DIRECT	GO:0065003~macromolecular complex assembly	18	0.213194	0.0617662	102186374, 102170249, 102188373, 102183475, 102187803, 102182533, 102172592, 102174354, 102171591, 102178987, 108637781, 102170256, 102173900, 102170445, 102174800, 102191366, 102173973, 102174763	4114	40	13743	1.50325	1	1	1
GOTERM_BP_DIRECT	GO:0016055~Wnt signaling pathway	30	0.355324	0.0652567	102189698, 102188324, 102186146, 106504040, 102170911, 100860773, 100860772, 102182348, 102180102, 102178569, 100860770, 102173071, 102191141, 102188280, 102173712, 102176768, 102185291, 102174743, 102175557, 102171430, 102177435, 102184053, 102186772, 102170921, 102180032, 102178478, 102176310, 102177945, 102175700, 102170375	4114	75	13743	1.33622	1	1	1
GOTERM_BP_DIRECT	GO:1900745~positive regulation of p38MAPK cascade	11	0.130285	0.0664399	102186416, 102171973, 102185559, 100860794, 102168201, 100860789, 102173036, 102188317, 102190376, 102168873, 102172543	4114	21	13743	1.74981	1	1	1
GOTERM_BP_DIRECT	GO:0051216~cartilage development	15	0.177662	0.0679863	102188824, 102169623, 102181864, 102172770, 108637781, 102182426, 102182805, 106501975, 102173238, 102175912, 102174008, 102190342, 102177778, 102172212, 102178974	4114	32	13743	1.56588	1	1	1
GOTERM_BP_DIRECT	GO:0061743~motor learning	5	0.0592207	0.0698564	102182190, 102171274, 102176470, 102190353, 102173687	4114	6	13743	2.78379	1	1	1
GOTERM_BP_DIRECT	GO:1903546~protein localization to photoreceptor outer segment	5	0.0592207	0.0698564	102188367, 102182923, 102172241, 102177807, 102184640	4114	6	13743	2.78379	1	1	1
GOTERM_BP_DIRECT	GO:0038202~TORC1 signaling	5	0.0592207	0.0698564	100860902, 102173122, 102176233, 102190375, 100861036	4114	6	13743	2.78379	1	1	1
GOTERM_BP_DIRECT	GO:1900015~regulation of cytokine production involved in inflammatory response	5	0.0592207	0.0698564	102189174, 100860794, 102188538, 102168425, 100860742	4114	6	13743	2.78379	1	1	1
GOTERM_BP_DIRECT	GO:0010669~epithelial structure maintenance	5	0.0592207	0.0698564	102185947, 102173700, 102188280, 102172485, 102186414	4114	6	13743	2.78379	1	1	1
GOTERM_BP_DIRECT	GO:2001033~negative regulation of double-strand break repair via nonhomologous end joining	5	0.0592207	0.0698564	100860792, 102181839, 102188827, 102178552, 102190573	4114	6	13743	2.78379	1	1	1
GOTERM_BP_DIRECT	GO:0019395~fatty acid oxidation	5	0.0592207	0.0698564	102174892, 102168738, 100861392, 102187263, 102189174	4114	6	13743	2.78379	1	1	1
GOTERM_BP_DIRECT	GO:0007626~locomotory behavior	23	0.272415	0.0710815	102182060, 102185002, 102190603, 102184062, 106503070, 108638469, 102182167, 102187878, 100860871, 102185434, 102182961, 100860973, 102180696, 100861196, 102181217, 102171274, 102179849, 102185718, 102180913, 102176857, 102174668, 102175798, 102191101	4114	55	13743	1.39695	1	1	1
GOTERM_BP_DIRECT	GO:0043507~positive regulation of JUN kinase activity	16	0.189506	0.0714827	102182190, 102170921, 102184255, 102184398, 102186147, 102168873, 102182554, 100861232, 106501756, 102175912, 102191384, 102174723, 102173267, 102172543, 102170375, 102173038	4114	35	13743	1.52711	1	1	1
GOTERM_BP_DIRECT	GO:0007018~microtubule-based movement	24	0.284259	0.0722602	102188499, 102191666, 102180081, 106503394, 102170007, 102171999, 102187261, 102168781, 102185944, 102188823, 102176048, 102178942, 102174210, 102179503, 102180974, 102176056, 102184759, 102177286, 102179990, 102168909, 102170175, 102174633, 102175059, 102172378	4114	58	13743	1.38229	1	1	1
GOTERM_BP_DIRECT	GO:0032956~regulation of actin cytoskeleton organization	12	0.14213	0.0729345	102179559, 102178225, 102179537, 102185132, 102169848, 102184374, 102182834, 102179195, 102169409, 102176072, 102188644, 102182554	4114	24	13743	1.67027	1	1	1
GOTERM_BP_DIRECT	GO:0048013~ephrin receptor signaling pathway	9	0.106597	0.0733029	102178126, 102171274, 102168298, 102177271, 102177814, 102183496, 102168502, 106502352, 102177853	4114	16	13743	1.87906	1	1	1
GOTERM_BP_DIRECT	GO:0045618~positive regulation of keratinocyte differentiation	9	0.106597	0.0733029	102191766, 102175893, 102175795, 102169702, 102179593, 102177193, 102185685, 102180137, 102171630	4114	16	13743	1.87906	1	1	1
GOTERM_BP_DIRECT	GO:0097192~extrinsic apoptotic signaling pathway in absence of ligand	9	0.106597	0.0733029	102171716, 102170160, 102178478, 102189930, 100861254, 102173448, 102170562, 100846984, 102185798	4114	16	13743	1.87906	1	1	1
GOTERM_BP_DIRECT	GO:0010468~regulation of gene expression	27	0.319792	0.0748382	102191658, 102170557, 102184283, 100860953, 102168391, 102172241, 102177430, 102172543, 102178128, 102183282, 102189225, 102190117, 100860907, 102183881, 102184398, 102189725, 102175520, 102177365, 100861254, 102169472, 102174438, 102170279, 102170730, 102190043, 102171644, 102171025, 102190884	4114	67	13743	1.34619	1	1	1
GOTERM_BP_DIRECT	GO:0035264~multicellular organism growth	28	0.331636	0.0754321	102190269, 102188464, 102177271, 102169323, 100860953, 102180479, 102171252, 102179616, 102171091, 102168274, 102186061, 102170489, 102179357, 100860902, 102168745, 102190117, 102184470, 102181001, 102187428, 102189889, 102181954, 102186728, 102181839, 102176470, 102177020, 102189460, 102170730, 102177986	4114	70	13743	1.33622	1	1	1
GOTERM_BP_DIRECT	GO:0048169~regulation of long-term neuronal synaptic plasticity	7	0.0829089	0.0773299	102177355, 102184208, 102186816, 102186668, 102187803, 102186997, 102182488	4114	11	13743	2.1258	1	1	1
GOTERM_BP_DIRECT	GO:0031929~TOR signaling	7	0.0829089	0.0773299	102182528, 100861353, 102184283, 102179450, 102184058, 100861036, 102182675	4114	11	13743	2.1258	1	1	1
GOTERM_BP_DIRECT	GO:0046007~negative regulation of activated T cell proliferation	7	0.0829089	0.0773299	102179900, 102178945, 102177031, 102182705, 102179584, 102176712, 100860853	4114	11	13743	2.1258	1	1	1
GOTERM_BP_DIRECT	GO:1905564~positive regulation of vascular endothelial cell proliferation	7	0.0829089	0.0773299	102186892, 102186154, 102180282, 106502912, 102174051, 102174381, 102188120	4114	11	13743	2.1258	1	1	1
GOTERM_BP_DIRECT	GO:0045216~cell-cell junction organization	7	0.0829089	0.0773299	102189962, 102170370, 102169293, 102191364, 108634543, 102177479, 102178216	4114	11	13743	2.1258	1	1	1
GOTERM_BP_DIRECT	GO:0003382~epithelial cell morphogenesis	7	0.0829089	0.0773299	102182526, 102179616, 102180000, 102189372, 102191795, 102183090, 102177831	4114	11	13743	2.1258	1	1	1
GOTERM_BP_DIRECT	GO:0032270~positive regulation of cellular protein metabolic process	7	0.0829089	0.0773299	100860902, 102172230, 100860906, 102171665, 102188824, 102191364, 102169137	4114	11	13743	2.1258	1	1	1
GOTERM_BP_DIRECT	GO:0030225~macrophage differentiation	7	0.0829089	0.0773299	102174211, 100861208, 102174806, 102186416, 102170124, 100860789, 102177713	4114	11	13743	2.1258	1	1	1
GOTERM_BP_DIRECT	GO:0030334~regulation of cell migration	20	0.236883	0.0810778	102180081, 102168932, 102189897, 102188740, 102171999, 102171801, 102175859, 102169652, 102178040, 102185604, 102185445, 102183518, 102182528, 102181229, 102175641, 102173781, 102188280, 102175347, 102176601, 102173037	4114	47	13743	1.42151	1	1	1
GOTERM_BP_DIRECT	GO:0031122~cytoplasmic microtubule organization	10	0.118441	0.0826649	102189698, 102187169, 102189719, 102172349, 102183453, 102188627, 102170963, 102181792, 102176700, 102170375	4114	19	13743	1.75818	1	1	1
GOTERM_BP_DIRECT	GO:0043392~negative regulation of DNA binding	10	0.118441	0.0826649	102186168, 102178659, 100860792, 102173591, 102188373, 102169894, 102173018, 102171973, 102185423, 102172587	4114	19	13743	1.75818	1	1	1
GOTERM_BP_DIRECT	GO:0048741~skeletal muscle fiber development	10	0.118441	0.0826649	100861395, 102171362, 108637637, 102180163, 102179168, 102175625, 102184432, 102190475, 102173422, 102169259	4114	19	13743	1.75818	1	1	1
GOTERM_BP_DIRECT	GO:0045494~photoreceptor cell maintenance	14	0.165818	0.0828613	102168603, 102188367, 102190227, 102185094, 102191649, 108638601, 102181188, 102185888, 102169458, 102184640, 102174012, 102181839, 106502976, 106502887	4114	30	13743	1.55892	1	1	1
GOTERM_BP_DIRECT	GO:0051149~positive regulation of muscle cell differentiation	4	0.0473765	0.0831262	108637637, 102170489, 102185318, 100861126	4114	4	13743	3.34054	1	1	1
GOTERM_BP_DIRECT	GO:1900103~positive regulation of endoplasmic reticulum unfolded protein response	4	0.0473765	0.0831262	102188710, 102170562, 102173038, 100846984	4114	4	13743	3.34054	1	1	1
GOTERM_BP_DIRECT	GO:0060762~regulation of branching involved in mammary gland duct morphogenesis	4	0.0473765	0.0831262	102170921, 102189719, 102187033, 102191364	4114	4	13743	3.34054	1	1	1
GOTERM_BP_DIRECT	GO:0051919~positive regulation of fibrinolysis	4	0.0473765	0.0831262	102178999, 102184496, 102184030, 102184723	4114	4	13743	3.34054	1	1	1
GOTERM_BP_DIRECT	GO:0090235~regulation of metaphase plate congression	4	0.0473765	0.0831262	102180974, 102170846, 102180860, 102171630	4114	4	13743	3.34054	1	1	1
GOTERM_BP_DIRECT	GO:0048743~positive regulation of skeletal muscle fiber development	4	0.0473765	0.0831262	100861395, 100861254, 102179075, 102175625	4114	4	13743	3.34054	1	1	1
GOTERM_BP_DIRECT	GO:0090402~oncogene-induced cell senescence	4	0.0473765	0.0831262	100860792, 102186416, 102171667, 102173973	4114	4	13743	3.34054	1	1	1
GOTERM_BP_DIRECT	GO:0085020~protein K6-linked ubiquitination	4	0.0473765	0.0831262	102173121, 102181493, 102190703, 102183816	4114	4	13743	3.34054	1	1	1
GOTERM_BP_DIRECT	GO:0071340~skeletal muscle acetylcholine-gated channel clustering	4	0.0473765	0.0831262	102189698, 102182175, 102185291, 102185488	4114	4	13743	3.34054	1	1	1
GOTERM_BP_DIRECT	GO:0032388~positive regulation of intracellular transport	4	0.0473765	0.0831262	102186364, 102180974, 102182859, 102171630	4114	4	13743	3.34054	1	1	1
GOTERM_BP_DIRECT	GO:0097647~amylin receptor signaling pathway	4	0.0473765	0.0831262	102175362, 102173062, 102189616, 102178091	4114	4	13743	3.34054	1	1	1
GOTERM_BP_DIRECT	GO:2000672~negative regulation of motor neuron apoptotic process	4	0.0473765	0.0831262	102190951, 102174723, 102175799, 102183434	4114	4	13743	3.34054	1	1	1
GOTERM_BP_DIRECT	GO:0071356~cellular response to tumor necrosis factor	23	0.272415	0.0850889	102187169, 108637637, 102181392, 102171407, 102183003, 102169323, 102188824, 102169733, 102168578, 100861395, 102172770, 106502606, 102186909, 102173121, 102173238, 102189174, 102178407, 102179883, 102177713, 102177657, 102190376, 102172212, 102177710	4114	56	13743	1.37201	1	1	1
GOTERM_BP_DIRECT	GO:0051865~protein autoubiquitination	24	0.284259	0.0860067	102181493, 102170349, 102170119, 108638625, 102187429, 102169189, 102184255, 102180255, 102185016, 102189865, 102187326, 102174098, 108637186, 102174472, 102173121, 102178914, 100861096, 102171356, 102171555, 102173526, 102173988, 102171754, 102179225, 102176326	4114	59	13743	1.35887	1	1	1
GOTERM_BP_DIRECT	GO:0008104~protein localization	15	0.177662	0.0866325	102186485, 102188894, 102184280, 102179051, 102172859, 100861039, 102182453, 102174060, 102185445, 102188139, 102177355, 102189708, 102172701, 102177778, 102175797	4114	33	13743	1.51843	1	1	1
GOTERM_BP_DIRECT	GO:0045892~negative regulation of transcription, DNA-templated	65	0.769869	0.0871469	102190545, 100861208, 108637538, 102178580, 102186120, 102181392, 102185877, 100860795, 102169067, 108638624, 102184982, 102178546, 102170063, 108638462, 102183922, 102176760, 100860792, 102183409, 102171798, 102191364, 102177657, 102173973, 106503582, 102187620, 108638419, 102187428, 102185207, 108637646, 100860760, 102184398, 102181003, 102187942, 102172371, 102170237, 102179887, 102176852, 102…	4114	184	13743	1.18008	1	1	1
GOTERM_BP_DIRECT	GO:0050796~regulation of insulin secretion	11	0.130285	0.0901604	102179646, 102170848, 102170063, 102191080, 100861232, 102170832, 102174704, 102185326, 100860794, 102168425, 100860742	4114	22	13743	1.67027	1	1	1
GOTERM_BP_DIRECT	GO:0030168~platelet activation	11	0.130285	0.0901604	102175860, 106503142, 102181854, 102191119, 102183153, 102173700, 102185018, 102181288, 102188813, 106502258, 102170054	4114	22	13743	1.67027	1	1	1
GOTERM_BP_DIRECT	GO:0048167~regulation of synaptic plasticity	8	0.094753	0.0921367	102184374, 102181304, 102182657, 100861353, 102184470, 102187669, 102173853, 102176203	4114	14	13743	1.90888	1	1	1
GOTERM_BP_DIRECT	GO:0010629~negative regulation of gene expression	57	0.675115	0.0942722	102181392, 102169025, 102168330, 102183893, 102169067, 102169304, 102174221, 106502606, 102178945, 102191364, 102174982, 106504031, 102171917, 102184232, 102168848, 102184073, 102180396, 102191828, 102169892, 102189966, 102185884, 102184356, 102178314, 102179922, 102181318, 102184829, 102184549, 102182805, 102177020, 102190064, 102170314, 102174833, 102191579, 108637839, 102191734, 102186186, 102…	4114	160	13743	1.19007	1	1	1
GOTERM_BP_DIRECT	GO:0007613~memory	18	0.213194	0.0945904	106502271, 106503162, 102189279, 102173902, 102186423, 102185499, 100860973, 102179228, 102176587, 102191080, 100861353, 102181217, 102182928, 102179849, 102178849, 102171644, 102173333, 102191101	4114	42	13743	1.43166	1	1	1
GOTERM_BP_DIRECT	GO:0030217~T cell differentiation	12	0.14213	0.0961928	102171529, 102169449, 102179903, 102172306, 102171746, 102180396, 102171642, 102178980, 100860794, 102177428, 102174643, 102184202	4114	25	13743	1.60346	1	1	1
GOTERM_BP_DIRECT	GO:0045184~establishment of protein localization	12	0.14213	0.0961928	102173619, 102184829, 102177586, 102171999, 102184349, 102171678, 102187803, 102183998, 102171819, 102190475, 102176601, 106502441	4114	25	13743	1.60346	1	1	1
GOTERM_BP_DIRECT	GO:0030878~thyroid gland development	12	0.14213	0.0961928	102180349, 102169293, 102175285, 102173700, 106502413, 108638469, 102175912, 102186338, 102188824, 102169623, 102182513, 100750237	4114	25	13743	1.60346	1	1	1
GOTERM_BP_DIRECT	GO:0046339~diacylglycerol metabolic process	6	0.0710648	0.0978573	102175275, 100861270, 102189384, 102184173, 102171485, 100861225	4114	9	13743	2.22703	1	1	1
GOTERM_BP_DIRECT	GO:0046598~positive regulation of viral entry into host cell	6	0.0710648	0.0978573	102169902, 102189225, 102185560, 102183409, 102170124, 100860991	4114	9	13743	2.22703	1	1	1
GOTERM_BP_DIRECT	GO:0032515~negative regulation of phosphoprotein phosphatase activity	6	0.0710648	0.0978573	102183076, 102183085, 108633186, 102174531, 102186898, 102180696	4114	9	13743	2.22703	1	1	1
GOTERM_BP_DIRECT	GO:0003184~pulmonary valve morphogenesis	6	0.0710648	0.0978573	102191579, 102170738, 102177020, 102185338, 100860789, 102189768	4114	9	13743	2.22703	1	1	1
GOTERM_BP_DIRECT	GO:0001964~startle response	6	0.0710648	0.0978573	102177187, 102168274, 102170813, 102169587, 100860871, 102179488	4114	9	13743	2.22703	1	1	1
GOTERM_BP_DIRECT	GO:0016322~neuron remodeling	6	0.0710648	0.0978573	102181473, 102190353, 102187545, 102175711, 102186997, 102190014	4114	9	13743	2.22703	1	1	1
GOTERM_BP_DIRECT	GO:0010470~regulation of gastrulation	6	0.0710648	0.0978573	102170063, 102185094, 102170202, 102178640, 102183436, 102178403	4114	9	13743	2.22703	1	1	1
GOTERM_BP_DIRECT	GO:0045806~negative regulation of endocytosis	6	0.0710648	0.0978573	102185585, 102182928, 102191182, 102186125, 102171376, 102187326	4114	9	13743	2.22703	1	1	1
GOTERM_BP_DIRECT	GO:0001774~microglial cell activation	6	0.0710648	0.0978573	102178657, 100861232, 102185651, 102187545, 102168873, 102186997	4114	9	13743	2.22703	1	1	1
GOTERM_BP_DIRECT	GO:0002021~response to dietary excess	6	0.0710648	0.0978573	102171252, 106503824, 102189174, 100860794, 102170314, 100861288	4114	9	13743	2.22703	1	1	1
GOTERM_BP_DIRECT	GO:0045444~fat cell differentiation	20	0.236883	0.0978785	102187122, 102187488, 102189001, 102179593, 102187428, 102185438, 102173180, 102180246, 102181324, 102181039, 100860787, 102180102, 102178514, 100860792, 100861250, 102180902, 102173227, 102176935, 102177778, 102176754	4114	48	13743	1.39189	1	1	1

## Sheet: KEGG_C1
Category	Term	Count	%	PValue	Genes	List Total	Pop Hits	Pop Total	Fold Enrichment	Bonferroni	Benjamini	FDR
KEGG_PATHWAY	chx04010:MAPK signaling pathway	155	1.36336	2.40128e-05	102186443, 102172719, 102185072, 102186040, 102182240, 108636405, 102169942, 102168334, 100861289, 102185873, 100860996, 102178149, 102171591, 102174186, 102169384, 106501756, 102171599, 102172327, 102191364, 102179510, 102175799, 102175557, 102188180, 102173379, 102177853, 102190654, 102189962, 102181161, 102168441, 102178150, 102184834, 108636199, 108634211, 102169370, 100862660, 102175285, 100…	3618	294	8897	1.29646	0.00827409	0.00411891	0.00363224
KEGG_PATHWAY	chx05200:Pathways in cancer	264	2.3221	3.50024e-05	102188104, 102189312, 100860911, 102183451, 102186040, 102174738, 102187813, 102187936, 102170818, 102169942, 102186169, 102180614, 102171591, 102169384, 102175836, 102171599, 102189445, 102189202, 102185084, 102188350, 102180076, 100846984, 108634211, 102169259, 102169370, 102175285, 102187819, 102176130, 102171367, 100860919, 102189698, 100860814, 102171801, 102171922, 102174518, 102187716, 102…	3618	537	8897	1.20894	0.012038	0.00411891	0.00363224
KEGG_PATHWAY	chx04926:Relaxin signaling pathway	78	0.686076	5.64286e-05	100860957, 102188104, 102189677, 108635635, 102189312, 102185072, 102186040, 102177052, 102180221, 102188824, 102183893, 100860996, 108635476, 100861087, 102178269, 102190190, 102186081, 102170620, 102172767, 102191364, 102171671, 102191486, 102175799, 102173178, 102173379, 108638619, 102174829, 102183745, 108634775, 102184510, 102188710, 100860765, 100861214, 102175285, 102187180, 102170356, 102…	3618	134	8897	1.43141	0.0193355	0.00411891	0.00363224
KEGG_PATHWAY	chx04810:Regulation of actin cytoskeleton	124	1.09069	6.06723e-05	102189399, 102188740, 102183451, 106503491, 102186040, 102187813, 102169942, 102170818, 102182645, 102185873, 102180225, 102183974, 102187899, 102182759, 102178149, 100861163, 102177334, 102171074, 102169384, 102171599, 102176802, 106503410, 102173015, 102172564, 102180190, 102182530, 108634211, 102169370, 102179802, 102175285, 102178396, 102174073, 102175206, 102175326, 102171364, 102179249, 102…	3618	231	8897	1.32003	0.0207744	0.00411891	0.00363224
KEGG_PATHWAY	chx04934:Cushing syndrome	88	0.774035	6.30064e-05	102187651, 102184185, 102188104, 100860911, 108637658, 102185072, 102186040, 102171306, 102184226, 100860751, 102180221, 102188824, 102183893, 102185438, 102182364, 102187776, 102168698, 102186169, 102186367, 102173131, 102176762, 102182514, 102173018, 102172767, 102171671, 102172684, 102177810, 102173379, 102174829, 102185084, 102183101, 102169331, 102185724, 102188517, 102186219, 102183745, 102…	3618	155	8897	1.39613	0.021565	0.00411891	0.00363224
KEGG_PATHWAY	chx04270:Vascular smooth muscle contraction	83	0.730055	7.12204e-05	102187651, 102188104, 102174619, 102186040, 102188141, 102177371, 102187978, 102188824, 102170818, 102186447, 108636085, 102178903, 106503219, 102191486, 102172683, 102173379, 102189885, 108638619, 102168967, 102180150, 102168409, 102185007, 102187867, 102169697, 102169892, 108633240, 100861577, 102169370, 102178279, 102170394, 102183812, 102175362, 102175285, 100861292, 102173062, 102185175, 102…	3618	145	8897	1.40762	0.024342	0.00411891	0.00363224
KEGG_PATHWAY	chx04928:Parathyroid hormone synthesis, secretion and action	62	0.545343	0.000305916	102188104, 100860911, 102185072, 108636405, 102186040, 102180221, 102188824, 102183893, 102170818, 102168896, 102174260, 102172767, 102177417, 102171671, 102173379, 102189445, 108638619, 102174829, 102180150, 102187945, 102168287, 102183745, 100860765, 102181317, 102169370, 100861254, 102176054, 102174434, 102171320, 102171520, 102185175, 100860858, 102169966, 102189653, 102188762, 102180282, 102…	3618	106	8897	1.43834	0.100452	0.0129225	0.0113956
KEGG_PATHWAY	chx00564:Glycerophospholipid metabolism	61	0.536547	0.000311377	102184141, 102182280, 102171508, 102186563, 102188141, 102187977, 102188869, 102168574, 102175275, 102181946, 106503219, 102181908, 102190030, 106503774, 102171596, 102190731, 102185364, 102187867, 102169892, 102168288, 102189889, 102188757, 102170908, 102174470, 102169493, 102171567, 102174434, 102171485, 102187398, 102190522, 102187595, 102187432, 102175409, 102182420, 102186824, 102168673, 108…	3618	104	8897	1.44235	0.102151	0.0129225	0.0113956
KEGG_PATHWAY	chx04658:Th1 and Th2 cell differentiation	53	0.46618	0.000345588	102184186, 102189630, 102189356, 102186442, 102188267, 102186040, 102171504, 102171746, 102188824, 102180664, 100860996, 100861087, 102171591, 102176287, 102181909, 102178783, 102188180, 102189202, 102180396, 102169656, 102184510, 102181878, 102176695, 102172253, 102186727, 100861293, 102177020, 102191154, 102175448, 102173900, 102176415, 102171520, 100860814, 100860813, 102187477, 102179937, 102…	3618	88	8897	1.48104	0.11272	0.0129225	0.0113956
KEGG_PATHWAY	chx04659:Th17 cell differentiation	61	0.536547	0.000441404	102189356, 102186442, 102188267, 102186040, 102171504, 102171746, 100861006, 102178020, 102188824, 102180664, 100860877, 102182006, 100860996, 100861087, 102171591, 102181909, 102174109, 102191364, 102178783, 102176844, 102188180, 102171111, 102189445, 102188350, 102169656, 102184510, 102188755, 102181878, 102169293, 102176695, 102172253, 102182888, 102186727, 102191154, 102173900, 102176415, 102…	3618	105	8897	1.42862	0.141664	0.0129225	0.0113956
KEGG_PATHWAY	chx04912:GnRH signaling pathway	54	0.474976	0.000499074	102188104, 102185072, 102173967, 102186040, 102188141, 102188824, 102181038, 100860996, 100861087, 102176762, 102180534, 102172767, 102175799, 102173178, 102173379, 108638619, 102185084, 102185007, 102187867, 102169697, 100861299, 102184510, 102185715, 102175285, 100861292, 102187180, 102170356, 102174434, 102187595, 102169966, 102184364, 102189653, 102171922, 102186668, 102184768, 102184919, 102…	3618	91	8897	1.45924	0.158629	0.0129225	0.0113956
KEGG_PATHWAY	chx04020:Calcium signaling pathway	123	1.08189	0.000515166	102188104, 102177052, 102187815, 102187936, 102169942, 102168337, 102187899, 102176762, 102181789, 102179517, 102169384, 100861281, 102189152, 102172049, 102171599, 102176524, 102177975, 102173379, 102185084, 102189285, 102185007, 102168441, 100861337, 102189726, 102168201, 108637965, 102184834, 102185124, 108634211, 100862660, 102173383, 102171362, 100861292, 102177187, 102180626, 102178396, 106…	3618	238	8897	1.27088	0.163303	0.0129225	0.0113956
KEGG_PATHWAY	chx04927:Cortisol synthesis and secretion	41	0.36063	0.000521369	102187651, 102188104, 102169966, 102189653, 100860911, 102185072, 102171922, 102182663, 102180221, 102183893, 102185438, 102182364, 102184768, 102171809, 102173131, 102184919, 102182514, 102172701, 102171671, 102173379, 102190378, 102174829, 102187163, 102185469, 102175061, 102169331, 102185724, 102188517, 102186219, 102183745, 102189746, 102186579, 102188238, 108633189, 102180724, 102178475, 100…	3618	65	8897	1.55112	0.165098	0.0129225	0.0113956
KEGG_PATHWAY	chx04664:Fc epsilon RI signaling pathway	41	0.36063	0.000521369	100860814, 102187595, 102187477, 100861208, 102173967, 102186040, 102188141, 102190507, 102186668, 102188824, 102184966, 100860996, 102177137, 102178149, 100861087, 102178569, 102184818, 102177551, 102173438, 102176802, 102178783, 102175799, 102175216, 102173178, 102191004, 102176204, 108638619, 102170408, 100860904, 102187867, 102189645, 102184510, 102188710, 102168425, 102181878, 102175285, 102…	3618	65	8897	1.55112	0.165098	0.0129225	0.0113956
KEGG_PATHWAY	chx04014:Ras signaling pathway	122	1.07309	0.000815353	102189677, 102189312, 102187410, 102186040, 102169300, 102184306, 102169942, 102185873, 102178149, 102171591, 102181789, 102169384, 102171599, 102178783, 102173379, 102177853, 102185007, 102182530, 102169892, 108634211, 100862660, 102174470, 102175285, 102178396, 102170311, 100860919, 102180480, 102170439, 108634241, 102183232, 102168673, 102183115, 102178569, 102177991, 102170280, 102170564, 102…	3618	238	8897	1.26054	0.245898	0.0188618	0.0166332
KEGG_PATHWAY	chx04925:Aldosterone synthesis and secretion	55	0.483772	0.000991726	102187651, 102188104, 102185072, 102180221, 102187815, 102183893, 102185438, 102182364, 102185318, 102186447, 102173131, 102176762, 102182514, 102183405, 102170586, 102171671, 102176524, 102173379, 102174829, 102185084, 102169739, 102185007, 102169697, 102185724, 102183745, 102186579, 102174671, 102178475, 102185715, 100861292, 102174710, 102169966, 102189653, 102171922, 102169808, 102184768, 102…	3618	95	8897	1.42369	0.29058	0.0215081	0.0189668
KEGG_PATHWAY	chx04015:Rap1 signaling pathway	109	0.958747	0.00112317	102188104, 102189399, 102187410, 102183451, 102186040, 102184425, 102169942, 102185873, 100860996, 102178149, 102181789, 102169384, 102178145, 102171599, 102176802, 102178783, 102177853, 102173818, 102179482, 102185007, 100860765, 108634211, 100862660, 102182889, 102175285, 102178396, 102175206, 102175326, 102185098, 102180480, 102171922, 102189175, 108634241, 102181179, 100861185, 102178569, 102…	3618	211	8897	1.27034	0.322155	0.022926	0.0202171
KEGG_PATHWAY	chx04915:Estrogen signaling pathway	74	0.650893	0.0013512	102188104, 102189677, 102168858, 100860911, 102185072, 102186040, 102182240, 102176161, 100861006, 102168573, 102180221, 102188824, 102183893, 102169302, 102179515, 102182514, 102176726, 102172767, 102171671, 102173379, 102178106, 108638619, 102174829, 102169739, 102188350, 100860849, 102185007, 102169697, 102181566, 102183745, 102188710, 100860765, 100861254, 102175285, 106503626, 102187180, 102…	3618	136	8897	1.33804	0.373641	0.0260481	0.0229704
KEGG_PATHWAY	chx04725:Cholinergic synapse	62	0.545343	0.00153465	102182280, 102188104, 102189312, 102185072, 102186040, 102180221, 102188824, 102183893, 102184665, 102182956, 102176762, 102190190, 102186081, 102174425, 102173379, 102174829, 102185084, 102168441, 102183745, 102188710, 100860765, 102183979, 100861254, 102185715, 100861292, 102187180, 102170710, 102170991, 102171520, 102189138, 102169966, 102186145, 102189653, 102171922, 102179250, 102174913, 102…	3618	111	8897	1.37355	0.412216	0.0280275	0.0247159
KEGG_PATHWAY	chx05224:Breast cancer	80	0.703668	0.00180055	102184186, 102189677, 102189630, 100860911, 102180381, 108637658, 102186040, 102171306, 102179273, 100860838, 102188824, 102187776, 102169942, 102168896, 102186169, 102169302, 102181989, 102169384, 102173018, 102171599, 102172767, 102177417, 102186892, 108638619, 102189202, 102180396, 102188317, 100846984, 102188710, 108634211, 102169259, 102169370, 102180348, 102175285, 102187819, 102178396, 102…	3618	150	8897	1.31152	0.463963	0.0312395	0.0275484
KEGG_PATHWAY	chx05414:Dilated cardiomyopathy	54	0.474976	0.00195093	102187651, 102173608, 102188104, 102175908, 102183451, 106503290, 100860838, 102187450, 102184468, 102187813, 102169305, 102171074, 102178827, 102181869, 102191364, 102172403, 106502520, 102173379, 102179831, 102179435, 102189962, 102180190, 102181161, 102186137, 100861292, 102180626, 102174073, 108638090, 102171922, 102181695, 102185415, 108638201, 102185499, 102187558, 100860775, 102176587, 102…	3618	95	8897	1.3978	0.49119	0.0322368	0.0284278
KEGG_PATHWAY	chx04024:cAMP signaling pathway	119	1.04671	0.00244488	102188104, 102187254, 102186040, 102180221, 102184425, 102187815, 102182364, 102181038, 102168337, 102186447, 102178149, 102176762, 102191080, 102182514, 102181789, 102178145, 102178142, 102191362, 102175836, 102176802, 102176524, 102188180, 102173379, 102185084, 102185007, 102183745, 100861299, 102185124, 100860765, 100861291, 102175285, 100861292, 102177187, 102180626, 102171520, 102179249, 102…	3618	237	8897	1.23473	0.571285	0.0385624	0.034006
KEGG_PATHWAY	chx01522:Endocrine resistance	54	0.474976	0.00265449	102188104, 102184186, 102189677, 102189630, 100860911, 102186040, 102171306, 100860838, 102188824, 102186169, 100860996, 100861087, 102181989, 102173018, 102172767, 102173379, 108638619, 102189202, 102180396, 100846984, 102184510, 102188710, 102169370, 100861254, 102175285, 106503626, 102177020, 102187180, 102170356, 102173344, 102171520, 102189930, 102184364, 102171922, 102186668, 108636541, 102…	3618	96	8897	1.38324	0.601351	0.0400482	0.0353163
KEGG_PATHWAY	chx04950:Maturity onset diabetes of the young	19	0.167121	0.00300058	102182050, 102182380, 102190812, 108635905, 108637537, 102187548, 108634241, 108637276, 102169414, 102169644, 108636284, 102180336, 102170063, 102185429, 102177474, 102174031, 102172028, 102174500, 102191311	3618	26	8897	1.79703	0.646462	0.0433835	0.0382575
KEGG_PATHWAY	chx05221:Acute myeloid leukemia	40	0.351834	0.00386326	102189930, 102185772, 100861208, 102186040, 102174518, 102190507, 102178020, 100861303, 102186668, 102188824, 102187776, 102171591, 100861386, 102178465, 102177551, 102172327, 102177713, 102173973, 108638619, 102186154, 100860901, 102188350, 100860904, 102186416, 102185866, 102180076, 100861234, 102188710, 102182675, 102169370, 102174211, 102175660, 102174096, 102175285, 102170135, 102170356, 102…	3618	68	8897	1.44653	0.737965	0.0536221	0.0472863
KEGG_PATHWAY	chx04072:Phospholipase D signaling pathway	77	0.67728	0.00410698	102187651, 102188104, 102189677, 102189399, 102187410, 102186040, 102188141, 102188824, 102170818, 102185873, 102189634, 102182961, 102177137, 102175275, 102178145, 102181946, 102189196, 102178660, 102190593, 102172767, 102191004, 102174268, 108638619, 102185364, 102184232, 102187867, 102168201, 102188710, 102184511, 102181878, 102181359, 102175285, 102174559, 102170311, 102187180, 102170356, 102…	3618	147	8897	1.2881	0.759237	0.0548124	0.048336
KEGG_PATHWAY	chx05415:Diabetic cardiomyopathy	109	0.958747	0.00531122	102187651, 102168736, 100860911, 102188065, 100860996, 100861284, 102178149, 102176762, 102179638, 102175034, 102168293, 102184937, 102188061, 102191364, 102190154, 102172289, 102189962, 102170705, 102171917, 102168606, 102185084, 102180353, 102185248, 102180626, 102188764, 108637636, 102187154, 102183195, 100861349, 102181571, 108634241, 102184322, 100860775, 102168710, 102181207, 102173276, 102…	3618	219	8897	1.22393	0.841592	0.0668422	0.0589445
KEGG_PATHWAY	chx04080:Neuroactive ligand-receptor interaction	180	1.58325	0.00539361	102187651, 102189399, 102172438, 102169388, 102187936, 100860871, 102182364, 102181038, 108634224, 102187379, 102168337, 108634223, 102187899, 102180585, 102184665, 102169381, 102183209, 102178269, 108636085, 102191080, 102182514, 102181789, 102179517, 102177174, 102177975, 102191504, 102187262, 102190659, 102186338, 102181288, 102186858, 108637965, 100861299, 102185124, 102184431, 102186972, 100…	3618	380	8897	1.16483	0.846067	0.0668422	0.0589445
KEGG_PATHWAY	chx04921:Oxytocin signaling pathway	79	0.694872	0.00585866	102188104, 102175908, 102186040, 102188141, 106503290, 102188824, 102185318, 102186447, 102182956, 102176762, 102180534, 102172767, 102174425, 102172403, 102188180, 102173379, 102179831, 108638619, 102168967, 102185084, 102169739, 102181161, 102185007, 102187867, 102169697, 102185124, 100860765, 100861577, 102170394, 102174671, 102185715, 102175285, 100861292, 108638090, 102187180, 102171520, 102…	3618	153	8897	1.26973	0.869065	0.0701019	0.061819
KEGG_PATHWAY	chx04666:Fc gamma R-mediated phagocytosis	53	0.46618	0.00645973	106503491, 102186040, 102188141, 102188824, 102180225, 102177137, 102182759, 102178149, 102171472, 102181946, 102170587, 102176802, 102178783, 106503410, 102172564, 108638619, 102170108, 102175716, 108637962, 102182970, 102187867, 102168201, 102176291, 102186774, 102188710, 102189645, 102183859, 102181878, 102174559, 102170311, 102171567, 102175206, 102177428, 102174434, 102171364, 102190345, 102…	3618	97	8897	1.34363	0.893788	0.0747175	0.0658892
KEGG_PATHWAY	chx04650:Natural killer cell mediated cytotoxicity	80	0.703668	0.00692055	102189677, 100861208, 102186040, 102171746, 102188824, 102184229, 102181113, 108638467, 108635630, 108633178, 108638461, 102178303, 102178149, 102178826, 102175151, 102176802, 102178783, 102188180, 102191004, 108638619, 102190217, 102186296, 102175959, 108634694, 108636634, 102188710, 102189645, 108633243, 102181878, 102169370, 108638053, 102176695, 102175285, 102178352, 108638096, 102187180, 102…	3618	156	8897	1.26107	0.909539	0.0774655	0.0683125
KEGG_PATHWAY	chx04935:Growth hormone synthesis, secretion and action	63	0.554138	0.00723276	102188104, 102189677, 102185072, 102173967, 102186040, 100860838, 102180221, 102188824, 102183893, 100860996, 100861087, 102174541, 102170466, 102171671, 102175799, 102173379, 108638619, 102174829, 102183745, 102184510, 102188710, 100860765, 102181878, 102176451, 102175285, 100861292, 102177021, 102187180, 102170356, 102175206, 102176415, 106503587, 102179643, 102171520, 102188365, 102169966, 102…	3618	119	8897	1.30187	0.918864	0.0784302	0.0691633
KEGG_PATHWAY	chx05166:Human T-cell leukemia virus 1 infection	115	1.01152	0.00813718	102188104, 102186684, 102186442, 100861208, 102189430, 102185072, 102186040, 102171504, 102171746, 102170659, 102184382, 100860751, 102180221, 102180584, 102186169, 102172283, 102171591, 102173018, 102191364, 102172568, 102175799, 102188180, 102173379, 102189962, 102191504, 102169656, 102183745, 100846984, 102175285, 102186727, 102173700, 102180907, 100860919, 102176415, 102171520, 100860813, 102…	3618	235	8897	1.20339	0.940809	0.0855637	0.0754539
KEGG_PATHWAY	chx01100:Metabolic pathways	704	6.19228	0.00885102	102181151, 102174619, 102174737, 102168297, 102182002, 108633257, 102187810, 102182004, 102180069, 102170380, 102168293, 102187926, 102168295, 102170388, 102173897, 102179079, 102174503, 102174863, 102172683, 102184671, 102175719, 102183460, 102176806, 100861215, 102180199, 102181043, 108633240, 108633246, 100861577, 102191194, 102169493, 102176815, 102179088, 102172338, 102173548, 102171485, 102…	3618	1623	8897	1.06667	0.95386	0.0881953	0.0777745
KEGG_PATHWAY	chx05135:Yersinia infection	74	0.650893	0.00889577	102172719, 106503491, 102173967, 102186040, 102171746, 102188824, 102182645, 100860996, 102182759, 102178149, 100861087, 102171591, 102191283, 102176802, 102178783, 102188180, 102175799, 106503410, 102173178, 102170386, 102179831, 102172564, 102173015, 102180150, 102170108, 100861338, 108636634, 102186774, 102180871, 102184510, 102188710, 102189645, 108633243, 102183859, 102181878, 102176695, 102…	3618	144	8897	1.2637	0.954576	0.0881953	0.0777745
KEGG_PATHWAY	chx00565:Ether lipid metabolism	32	0.281467	0.00931713	102190522, 102187595, 102185970, 102188141, 102187977, 102186626, 102168673, 108633234, 106503219, 102181946, 102170280, 102170564, 102170006, 102175216, 102169713, 102172928, 102168220, 102187867, 102182111, 102169694, 102188538, 102169892, 102186907, 102183913, 102172230, 102176672, 102176298, 102174470, 102173207, 102171567, 102174434, 102176556	3618	54	8897	1.45724	0.960791	0.0886447	0.0781709
KEGG_PATHWAY	chx04261:Adrenergic signaling in cardiomyocytes	77	0.67728	0.00960683	102187651, 102188104, 102175908, 102185072, 102186040, 102169508, 106503290, 102187450, 102180221, 102188824, 102187815, 102183893, 102168576, 102181952, 100860996, 102176565, 102176762, 102183405, 102178145, 102178827, 102181869, 102171557, 102172403, 102171671, 102176524, 106502520, 102173379, 102179435, 102174829, 102185084, 102181161, 102185007, 108637886, 102182013, 102169697, 102183745, 102…	3618	151	8897	1.25397	0.964564	0.0886447	0.0781709
KEGG_PATHWAY	chx05030:Cocaine addiction	30	0.263875	0.00970749	102169726, 102190425, 102185072, 100860839, 102180221, 102183893, 102178040, 102177355, 102181789, 102177097, 102171671, 102190178, 102173379, 102190378, 102187167, 102174829, 102190515, 102187803, 100860866, 102183745, 102180115, 100860765, 102180696, 108633189, 102181359, 102175660, 102174096, 102179849, 102177187, 102174657	3618	50	8897	1.47546	0.965789	0.0886447	0.0781709
KEGG_PATHWAY	chx04930:Type II diabetes mellitus	28	0.246284	0.0100398	102189138, 102186420, 108637537, 102186040, 102188824, 108634241, 102182403, 108637276, 102187711, 100861087, 102185429, 102177551, 102170408, 102187163, 102190759, 102168441, 102187548, 102183003, 102184834, 102188710, 100861292, 102185938, 102170135, 102177406, 106503587, 102179643, 102178731, 102173125	3618	46	8897	1.49684	0.969539	0.0887383	0.0782534
KEGG_PATHWAY	chx03410:Base excision repair	21	0.184713	0.0102292	102186980, 102190358, 102190248, 108633368, 100860967, 102185332, 102182284, 102184765, 102173090, 102185977, 102187902, 102185136, 102182412, 100861350, 102173065, 102189063, 102191340, 102174734, 102174589, 102177963, 102170376	3618	32	8897	1.61378	0.971491	0.0887383	0.0782534
KEGG_PATHWAY	chx04929:GnRH secretion	36	0.316651	0.0116793	102169966, 102189653, 102186068, 102186040, 102186668, 102188824, 102184768, 102181038, 102189417, 102176463, 102177551, 102172166, 102170924, 108638619, 100860823, 102187163, 102169739, 100860805, 100860904, 100860861, 102185724, 102189746, 102186433, 102188710, 102187822, 102180531, 102175285, 100861292, 106503626, 102171060, 102176151, 102185938, 102170135, 102187180, 102177328, 102175984	3618	63	8897	1.4052	0.982834	0.0988469	0.0871676
KEGG_PATHWAY	chx05212:Pancreatic cancer	43	0.378221	0.0122981	100860957, 102189930, 102187410, 102186040, 102171306, 102188824, 100861145, 102186169, 108636541, 102180684, 102178149, 102182417, 102171591, 100861087, 102178569, 102181989, 102177551, 102173018, 102172767, 102173438, 102191364, 102170562, 102179898, 102189962, 102188455, 108638619, 102186154, 102170408, 100860904, 102183684, 100861013, 102188317, 100846984, 102188710, 102182675, 102169370, 102…	3618	78	8897	1.35565	0.986178	0.101606	0.0896003
KEGG_PATHWAY	chx05410:Hypertrophic cardiomyopathy	49	0.430997	0.0126937	102187651, 102173608, 102175908, 102183451, 106503290, 100860838, 102187450, 102184468, 102187813, 102169305, 102171074, 102178827, 102181869, 102191364, 102172403, 106502520, 102179831, 102179435, 102189962, 102180190, 102171917, 102181161, 102186137, 100861292, 102180626, 102174073, 108638090, 102181695, 102185415, 108638201, 102185499, 100861301, 100860775, 102176587, 102180712, 102178206, 102…	3618	91	8897	1.32413	0.987967	0.102435	0.0903318
KEGG_PATHWAY	chx05207:Chemical carcinogenesis - receptor activation	107	0.941156	0.0132318	102188104, 100860758, 102185072, 102186040, 102178383, 102180221, 108633257, 102184665, 102169384, 102175670, 104795701, 102173018, 102171599, 102173379, 102189445, 102168441, 102183101, 102183745, 108633246, 100860765, 108634211, 102175285, 100861292, 102178396, 106503668, 102170554, 102176415, 102171520, 108634920, 102173709, 102173429, 102171922, 102179250, 102181731, 102187558, 102177594, 102…	3618	220	8897	1.19601	0.990036	0.104008	0.0917191
KEGG_PATHWAY	chx04750:Inflammatory mediator regulation of TRP channels	59	0.518955	0.0134881	102188104, 102174619, 102173967, 102188141, 100860838, 100860996, 102187899, 100861087, 102176762, 102181502, 102178903, 102172683, 102173379, 102168409, 102185084, 102187263, 102185007, 102187867, 102169697, 108633284, 108633240, 102181445, 102184510, 102188710, 102181878, 100862660, 102185715, 102178674, 102187595, 102169966, 102189653, 102171922, 102186183, 102187231, 100860816, 102181571, 102…	3618	113	8897	1.28395	0.990892	0.104008	0.0917191
KEGG_PATHWAY	chx04728:Dopaminergic synapse	68	0.598118	0.0140612	102189312, 102185072, 102180221, 102183893, 102181952, 102168337, 108634223, 100860996, 100861087, 102176762, 102190190, 100861281, 102186081, 102171557, 102171671, 102173379, 102174829, 102191825, 102185084, 102169739, 102185007, 102168441, 108637886, 102182013, 102169697, 102183745, 102180115, 102184510, 100860765, 102178478, 102185715, 102169495, 102179849, 100861292, 102170070, 102173865, 102…	3618	133	8897	1.25728	0.992551	0.10599	0.0934666
KEGG_PATHWAY	chx05231:Choline metabolism in cancer	52	0.457384	0.014356	102187410, 102186563, 100860911, 106503491, 102186040, 102188141, 102188824, 102178149, 100861087, 102175275, 102181946, 102172767, 102174268, 108638619, 102184232, 102187867, 102181489, 102188710, 102183859, 102181878, 102175285, 102174559, 102187180, 102170356, 102171567, 102174434, 102171485, 102171520, 102190345, 102187595, 102186668, 102184966, 102183874, 102178569, 102175133, 102177551, 102…	3618	98	8897	1.30483	0.993283	0.10599	0.0934666
KEGG_PATHWAY	chx04722:Neurotrophin signaling pathway	62	0.545343	0.0181693	102181070, 102189677, 102185072, 102186040, 102184349, 102188824, 102180544, 100860996, 100861087, 102176762, 102180534, 102191283, 102181909, 102173735, 102173178, 108638619, 102169819, 102185084, 102185007, 102185689, 102169697, 102184079, 102184795, 100846984, 102184510, 102188710, 102176334, 102181878, 100862660, 100861254, 102185715, 102175285, 102170630, 102187180, 102170356, 102175206, 102…	3618	121	8897	1.26003	0.998243	0.131349	0.115829
KEGG_PATHWAY	chx04657:IL-17 signaling pathway	49	0.430997	0.0205717	102172719, 100861208, 108636405, 102186040, 100860839, 102183251, 100861006, 102188824, 100860877, 100860996, 100861087, 102171591, 102180534, 102170620, 102183809, 102171111, 102188951, 102171712, 102174827, 102185602, 102180672, 102183463, 102169211, 102184510, 102177420, 102183735, 100861170, 102171520, 100860814, 102187477, 102169328, 100860816, 108637430, 102168876, 102181208, 106502702, 102…	3618	93	8897	1.29565	0.999247	0.145681	0.128468
KEGG_PATHWAY	chx05321:Inflammatory bowel disease	35	0.307855	0.0219821	100860814, 102187477, 100860813, 102186442, 102189356, 102188267, 100860816, 100860877, 102180664, 100861289, 102188865, 102186424, 102176287, 102179937, 102172821, 102191364, 102176844, 102188180, 102171111, 102191269, 102189962, 102188455, 102186154, 102180571, 102169656, 100860844, 102188755, 100861236, 102169293, 102172253, 102175660, 102174096, 102186727, 100861293, 100861190	3618	63	8897	1.36616	0.999543	0.152556	0.13453
KEGG_PATHWAY	chx04071:Sphingolipid signaling pathway	61	0.536547	0.0231736	102186040, 102174737, 102188824, 102170818, 102181952, 100860996, 102187899, 102180585, 102177137, 102178149, 100861087, 102170388, 102171557, 102174787, 102191004, 108638619, 102170747, 108637886, 102182013, 102168201, 100846984, 108636398, 102184510, 102188710, 100860765, 102186017, 100861254, 102175285, 102170070, 102187180, 102174434, 102179963, 102185175, 102179093, 102169526, 102169966, 102…	3618	120	8897	1.25004	0.9997	0.157672	0.139042
KEGG_PATHWAY	chx00730:Thiamine metabolism	14	0.123142	0.0241882	102190876, 108633351, 102182002, 100861348, 102190919, 102169601, 102189447, 100860962, 102177102, 102176890, 102177176, 102190650, 102179897, 102179018	3618	20	8897	1.72137	0.999791	0.160913	0.141901
KEGG_PATHWAY	chx04933:AGE-RAGE signaling pathway in diabetic complications	55	0.483772	0.0245775	102187651, 100860957, 108635635, 102186040, 102171306, 102188824, 102169343, 102182645, 100861289, 100860996, 102181113, 108635476, 100861087, 102191364, 102188180, 102189962, 102184479, 108634775, 100846984, 102184510, 102188710, 102181878, 102169293, 100861254, 102182609, 102187180, 102176415, 108634845, 102169966, 102186420, 102184364, 102189653, 100860816, 108634846, 102189099, 102186668, 102…	3618	107	8897	1.26402	0.999818	0.160913	0.141901
KEGG_PATHWAY	chx05226:Gastric cancer	75	0.659689	0.0262626	102184185, 102189677, 102180381, 108637658, 102186040, 102179273, 100860751, 102188824, 102187776, 102169942, 102168896, 102186169, 102181989, 102169384, 102173018, 102171599, 102172767, 102191364, 102177417, 102189445, 102186892, 102189962, 108638619, 102180076, 102188317, 100846984, 102188710, 108634211, 102169259, 102169370, 102169293, 100861254, 102180348, 102175285, 102187819, 102178396, 106…	3618	152	8897	1.21337	0.9999	0.168762	0.148821
KEGG_PATHWAY	chx04742:Taste transduction	44	0.387017	0.0320363	102185396, 102185870, 102169966, 102189653, 102186068, 102183153, 108637617, 102169542, 102175193, 102184768, 102185516, 102189978, 102185434, 100861026, 102169841, 102184919, 102190190, 102178189, 102182958, 102190031, 102175899, 102179795, 102171854, 102173379, 102170364, 102184032, 108633307, 102185469, 102168441, 108633300, 102184313, 102183269, 102175245, 102179923, 102170294, 102175485, 102…	3618	84	8897	1.2881	0.999987	0.20212	0.178239
KEGG_PATHWAY	chx05219:Bladder cancer	23	0.202305	0.0336365	102185462, 108638619, 100860957, 102184364, 102185182, 102171933, 102186040, 102171306, 102186668, 102188824, 102186169, 102168469, 108636541, 102169370, 102181989, 102175285, 102173018, 102170620, 102187180, 102172767, 102176318, 102177602, 102179898	3618	39	8897	1.45023	0.999993	0.207186	0.182706
KEGG_PATHWAY	chx04370:VEGF signaling pathway	31	0.272671	0.0340334	102187595, 100860957, 102189930, 102186040, 102188141, 102185338, 102186668, 102188824, 100860996, 102178149, 102178569, 102177551, 108633906, 102173438, 102175216, 108638619, 102169956, 100860904, 102178097, 102187867, 102168201, 102184079, 102184510, 102188710, 102181878, 102175285, 102180926, 102170135, 102187180, 102172854, 102175984	3618	56	8897	1.36128	0.999994	0.207186	0.182706
KEGG_PATHWAY	chx04062:Chemokine signaling pathway	90	0.791626	0.0356818	102188104, 102189677, 102189312, 102186040, 102171504, 102168936, 102188824, 102181154, 102189634, 100860874, 102178149, 102179713, 102171272, 102171591, 102180735, 102177575, 102178301, 102190190, 102186081, 102176802, 102173379, 108638619, 102169576, 102176291, 102169211, 102187225, 102169855, 102188710, 102189645, 100860765, 102183859, 102181878, 102178478, 102176894, 102176451, 102187180, 102…	3618	188	8897	1.17723	0.999997	0.210907	0.185987
KEGG_PATHWAY	chx05416:Viral myocarditis	36	0.316651	0.0358602	100860813, 102186442, 102184760, 102189356, 102188267, 102186140, 102171703, 102184468, 102180584, 102184349, 102180664, 102169305, 102181113, 100861185, 102178149, 102178569, 102180699, 102171130, 102176782, 102179937, 102181869, 102173997, 102173438, 106502520, 102176106, 102179831, 102170045, 102178403, 102175817, 102168905, 102183267, 102188814, 102186727, 102172138, 102172115, 102174655	3618	67	8897	1.3213	0.999997	0.210907	0.185987
KEGG_PATHWAY	chx05220:Chronic myeloid leukemia	41	0.36063	0.0365495	102189677, 102189930, 102184363, 102186040, 102171306, 102178020, 102186668, 102184349, 102188824, 102186169, 108636541, 102180684, 102177137, 102171591, 102177551, 102173018, 102191364, 102170562, 102179898, 102189962, 108638619, 102169956, 106503061, 100860904, 102185866, 102183684, 102188317, 100846984, 102188710, 102169370, 102169293, 102175660, 102174096, 102175285, 102170135, 102170356, 102…	3618	78	8897	1.2926	0.999997	0.211378	0.186402
KEGG_PATHWAY	chx00592:alpha-Linolenic acid metabolism	19	0.167121	0.0375636	102187595, 102169713, 102188141, 102168220, 102187867, 102182111, 102169892, 102168673, 108633234, 102184764, 102172230, 102176672, 102174470, 106503219, 102170280, 102170564, 102170006, 102175216, 102177788	3618	31	8897	1.50719	0.999998	0.213682	0.188434
KEGG_PATHWAY	chx05217:Basal cell carcinoma	34	0.299059	0.0390896	102189698, 108637658, 102180281, 102187776, 100860831, 102184049, 102178402, 102175498, 102178142, 102170201, 102175836, 102188083, 102171572, 102170562, 102177435, 102174961, 102179898, 100860901, 102188011, 102176193, 102183684, 102188317, 102181468, 100846984, 102180014, 102169259, 102180448, 102176310, 102180348, 102187819, 102171665, 102177945, 106502750, 102170375	3618	63	8897	1.32713	0.999999	0.214166	0.188861
KEGG_PATHWAY	chx05225:Hepatocellular carcinoma	84	0.738851	0.0394561	102189677, 100860758, 108637658, 102186040, 102171306, 102178383, 102188824, 102187776, 102186169, 102182688, 100860951, 102178103, 102173018, 102172767, 102191001, 102191364, 102177417, 102179831, 102177897, 102189962, 102191546, 108638619, 102174708, 102186295, 102182176, 102188317, 100846984, 102188710, 102169259, 102181878, 102169370, 102169293, 102180348, 102175285, 102187819, 102187180, 102…	3618	175	8897	1.18036	0.999999	0.214166	0.188861
KEGG_PATHWAY	chx00360:Phenylalanine metabolism	15	0.131938	0.0400831	102169726, 108637839, 102185156, 102170459, 102186370, 102186899, 102168762, 102185988, 102169793, 102180115, 102179701, 102182869, 102175783, 102168295, 106501774	3618	23	8897	1.60376	0.999999	0.214166	0.188861
KEGG_PATHWAY	chx04932:Non-alcoholic fatty liver disease	76	0.668484	0.0407949	102188420, 102168736, 102185072, 102188264, 108635517, 102177927, 102188065, 102188021, 100860794, 102168533, 100861289, 100860996, 100861284, 100861042, 100861087, 102179638, 102184937, 102191364, 100860908, 102175557, 102172289, 102188675, 102171716, 102188434, 102168407, 102182294, 102187548, 102172091, 102169976, 100846984, 102184510, 102188710, 102185248, 102178478, 102173267, 102171520, 102…	3618	157	8897	1.19039	0.999999	0.214166	0.188861
KEGG_PATHWAY	chx05163:Human cytomegalovirus infection	113	0.993931	0.0414758	102188104, 102189312, 100860911, 102185072, 102186040, 102187813, 102180221, 102180584, 102187936, 102181154, 102170818, 102186169, 100860996, 102178149, 102171591, 102178826, 102173018, 102188180, 102173379, 102185007, 108636634, 102183745, 100860765, 100846984, 108633243, 102175285, 102175206, 102171922, 100860816, 102180880, 102183232, 102184845, 108636541, 102180761, 102178569, 102176782, 102…	3618	242	8897	1.14825	1	0.214166	0.188861
KEGG_PATHWAY	chx00561:Glycerolipid metabolism	38	0.334242	0.0417398	102175409, 102189519, 102182420, 102176082, 102188869, 102179090, 102169567, 100861225, 102184718, 102181747, 102175275, 102181946, 102173798, 102183908, 102175656, 102172465, 102169617, 102185364, 100860889, 102174409, 102189384, 102184173, 102177282, 102169156, 108633884, 102183921, 102181346, 108633223, 102187646, 102183913, 100861270, 102171567, 102173866, 102191574, 102173200, 102171485, 102…	3618	72	8897	1.29785	1	0.214166	0.188861
KEGG_PATHWAY	chx04360:Axon guidance	86	0.756443	0.0419691	102169825, 102168932, 102186040, 102168298, 102184349, 102188824, 102183496, 102181473, 102183457, 102183848, 102178149, 102176762, 102171273, 102170184, 102187927, 102170587, 102179156, 102172166, 102170660, 102179434, 102191126, 102174862, 102177853, 102174785, 108638619, 102171839, 102184034, 102185084, 102182014, 102182530, 102180197, 102184794, 102187547, 102188710, 100860765, 102183467, 102…	3618	180	8897	1.1749	1	0.214166	0.188861
KEGG_PATHWAY	chx04660:T cell receptor signaling pathway	51	0.448588	0.0436129	102172719, 100861208, 102186040, 102171306, 102171746, 102188824, 100860996, 100861087, 102171591, 102181909, 102176802, 102178783, 102188180, 102173178, 108638619, 102182530, 102168321, 102184510, 102188710, 102189645, 102181878, 102176695, 102175285, 102185639, 102187180, 102170356, 102191154, 102173900, 102177428, 102171520, 102185010, 100860814, 102186668, 102184966, 102189617, 100860973, 102…	3618	101	8897	1.24172	1	0.219329	0.193414
KEGG_PATHWAY	chx05150:Staphylococcus aureus infection	46	0.404609	0.0448447	102189753, 102188588, 102168858, 100860813, 102187279, 102186442, 102189356, 102188267, 102182340, 102188881, 102168573, 102176161, 102169785, 102180664, 102181113, 100861185, 102179515, 102175054, 102177275, 102179937, 100861381, 102176085, 102171378, 102176726, 102175613, 102178106, 102169993, 102188835, 102186813, 102187545, 102181566, 102186356, 102181444, 102182455, 102173560, 100861192, 100…	3618	90	8897	1.25687	1	0.222301	0.196035
KEGG_PATHWAY	chx05235:PD-L1 expression and PD-1 checkpoint pathway in cancer	45	0.395813	0.0469072	102182082, 100860819, 102173967, 102186040, 102171746, 102174419, 102186668, 102184789, 102185812, 102188824, 100860996, 102171591, 102177551, 102170124, 102181909, 102170884, 102172767, 102172547, 102178783, 102173036, 102188180, 102174883, 102191269, 108638619, 102186154, 102190711, 100860904, 102168321, 102184510, 102188710, 102181421, 102182675, 102181878, 102176695, 102175660, 102174096, 102…	3618	88	8897	1.25749	1	0.229251	0.202163
KEGG_PATHWAY	chx05133:Pertussis	40	0.351834	0.0477117	102189753, 102188588, 102187279, 102184462, 102188583, 102186040, 100860816, 102184789, 102188824, 100861289, 100860996, 102187833, 100861185, 102176587, 100861087, 102177432, 102176085, 102170587, 102174883, 102178469, 102170408, 102171811, 102185007, 102169697, 100861338, 102188835, 102186813, 102187545, 102187248, 100860765, 102184510, 100860742, 102181884, 102175660, 102174096, 102180926, 100…	3618	77	8897	1.27745	1	0.229944	0.202775
KEGG_PATHWAY	chx05332:Graft-versus-host disease	33	0.290263	0.0522124	100860813, 102186442, 102184760, 102189356, 102188267, 102171703, 100860816, 102180584, 102184229, 102180664, 100861289, 108638467, 108633178, 108638461, 102171130, 102176782, 102179937, 106503874, 102170045, 102190217, 102175817, 102168905, 102188814, 102189305, 102176598, 108638053, 102186727, 102177285, 108638096, 102172138, 102189064, 102176878, 102172697	3618	62	8897	1.30887	1	0.248188	0.218863
KEGG_PATHWAY	chx04744:Phototransduction	17	0.149529	0.0575392	102189368, 102168525, 102186872, 102191747, 102180380, 108638601, 102185007, 102169697, 102187248, 102176894, 102187070, 102191362, 102191474, 106502751, 102171463, 102179413, 102174344	3618	28	8897	1.49302	1	0.269812	0.237933
KEGG_PATHWAY	chx04911:Insulin secretion	44	0.387017	0.0597634	102188104, 102169966, 102189653, 102185072, 102171922, 102180221, 102183893, 108634241, 102184768, 108637276, 102176762, 102191080, 102184919, 102183405, 102185429, 102174800, 102171671, 102170265, 102173379, 102190378, 102186276, 102170904, 102174829, 102191649, 102185084, 108633307, 102185469, 102169575, 102185547, 102183745, 102189746, 102182435, 108633189, 102171480, 102180724, 102183935, 102…	3618	87	8897	1.24368	1	0.273144	0.240871
KEGG_PATHWAY	chx04340:Hedgehog signaling pathway	30	0.263875	0.0598241	102187079, 102181092, 102189276, 102169685, 102187999, 102169860, 102189417, 102182522, 102168732, 102188788, 102180657, 102178402, 102170381, 102180735, 102183823, 102179616, 102178142, 102170201, 102175836, 102171572, 102173379, 102168427, 102188011, 102187802, 102180576, 102181468, 102186433, 100861254, 102191394, 102190287	3618	56	8897	1.31737	1	0.273144	0.240871
KEGG_PATHWAY	chx04380:Osteoclast differentiation	59	0.518955	0.0615347	102172719, 108636405, 102186040, 102171746, 100860839, 102189077, 102188824, 100861289, 100860996, 102177137, 100861087, 102171591, 102175151, 102190231, 102191364, 102188180, 102173178, 102190036, 102175312, 102176204, 102186416, 102176291, 108636634, 102184510, 102188710, 108633243, 102172251, 102171241, 102170356, 106503587, 102191552, 102171520, 108636629, 102185051, 102187231, 100861309, 100…	3618	121	8897	1.19906	1	0.277306	0.244541
KEGG_PATHWAY	chx05214:Glioma	38	0.334242	0.064558	102189677, 102186040, 102171306, 100860838, 102186668, 102188824, 102185318, 102186169, 108636541, 102176762, 102177551, 102173018, 102172767, 102170562, 102174268, 102179898, 108638619, 102169956, 102184232, 102185084, 100860904, 102185007, 102169697, 102183684, 102187248, 102188317, 100846984, 102188710, 102181878, 102169370, 102174671, 102185715, 102175285, 102170135, 102170356, 102187180, 106…	3618	74	8897	1.26278	1	0.283565	0.25006
KEGG_PATHWAY	chx05140:Leishmaniasis	38	0.334242	0.064558	100860814, 100860813, 102186442, 102172719, 102189356, 102188267, 102186040, 100860816, 102188824, 102180664, 100861289, 100860996, 100861185, 102176586, 102177432, 102171472, 102179937, 102191364, 102175930, 102170440, 102174883, 102191269, 102189962, 102175938, 102188617, 108637962, 102187405, 102176291, 102184510, 102181421, 100860742, 102175660, 102174096, 102180926, 102186727, 100861293, 102…	3618	74	8897	1.26278	1	0.283565	0.25006
KEGG_PATHWAY	chx05223:Non-small cell lung cancer	37	0.325446	0.0676237	102189930, 108634606, 102171504, 102186040, 102171306, 102186668, 102188824, 102184966, 102186169, 108636541, 102181989, 102177551, 102173018, 102172767, 102170562, 102179898, 102189445, 108638619, 102186154, 102171933, 100860904, 102185866, 102183684, 102188317, 100846984, 102188710, 102181878, 102169370, 102175144, 102175285, 102170135, 102170356, 102187180, 106502631, 102176415, 102174633, 102…	3618	72	8897	1.2637	1	0.289697	0.255467
KEGG_PATHWAY	chx05218:Melanoma	37	0.325446	0.0676237	102189930, 102180381, 102180282, 102186040, 102171306, 102179273, 100860838, 102186668, 102188824, 102169942, 102168896, 102186169, 108636541, 102177551, 102169384, 102173018, 102171599, 102172767, 102170562, 102174268, 102179898, 102186892, 108638619, 102184232, 102179261, 100860904, 102183684, 102188317, 100846984, 102188710, 108634211, 102169370, 102175285, 102178396, 102170135, 102187180, 102…	3618	72	8897	1.2637	1	0.289697	0.255467
KEGG_PATHWAY	chx05142:Chagas disease	55	0.483772	0.0732408	102186040, 102177052, 102188824, 102181154, 102181952, 100860996, 102187899, 100861087, 102171272, 102171591, 100861281, 102191364, 102175799, 102189962, 102171917, 108637886, 102182013, 108636634, 102186813, 102187545, 102184510, 102188710, 100860765, 108633243, 102170070, 100861293, 102191154, 102173900, 102171520, 108636629, 102187279, 102169966, 102186145, 102189653, 100860819, 100860816, 102…	3618	113	8897	1.1969	1	0.309934	0.273313
KEGG_PATHWAY	chx04975:Fat digestion and absorption	30	0.263875	0.0756952	102173729, 102180141, 102168673, 108633234, 102179090, 100861225, 102177013, 102183707, 106503219, 102181946, 102170280, 102170564, 102170006, 102172465, 102169713, 102174409, 102168220, 102169892, 102189408, 108633884, 108633223, 102184874, 102179867, 102183913, 102172230, 102178475, 102171567, 102173866, 102173200, 102190047	3618	57	8897	1.29426	1	0.311064	0.27431
KEGG_PATHWAY	chx05170:Human immunodeficiency virus 1 infection	106	0.93236	0.0758568	102189312, 102172719, 108636404, 102189276, 102186040, 102174738, 102180584, 100860996, 102178149, 102171591, 102178826, 102188180, 102185007, 102182530, 108636634, 100860765, 100846984, 108633243, 102175285, 102178551, 102175206, 102171364, 102171520, 102191656, 102183232, 102180761, 102184324, 102178569, 102170040, 102176782, 102179935, 102178441, 102180638, 102173438, 102170045, 102174883, 102…	3618	231	8897	1.12842	1	0.311064	0.27431
KEGG_PATHWAY	chx05162:Measles	68	0.598118	0.0761972	102184185, 102182082, 102172719, 102171306, 102171504, 102182240, 102174419, 100860751, 100861289, 102169786, 102180657, 100861087, 102171591, 102178826, 102190231, 102183809, 106503773, 102186893, 100860849, 108636634, 102169656, 100846984, 102188710, 108633243, 100861254, 100861293, 102171367, 102191154, 102176415, 102172254, 102191552, 102190983, 102171520, 102178315, 108636629, 102189930, 100…	3618	143	8897	1.16936	1	0.311064	0.27431
KEGG_PATHWAY	chx04620:Toll-like receptor signaling pathway	53	0.46618	0.079948	102172719, 102173967, 102186040, 102188824, 102184789, 102181154, 100860996, 100861087, 102171272, 102171591, 102178826, 100860909, 102183809, 106503773, 102175799, 102173178, 100860805, 108636634, 100860844, 102184510, 102188710, 108633243, 102175285, 100861293, 102171325, 102191552, 102171520, 108636629, 102184760, 100860819, 100860816, 102180880, 108636621, 102180761, 102186029, 102175057, 102…	3618	109	8897	1.19571	1	0.319105	0.281401
KEGG_PATHWAY	chx04144:Endocytosis	116	1.02032	0.0810525	102187378, 102187499, 102182240, 102184425, 102180584, 102183970, 102182759, 102170381, 102180735, 102178660, 106503410, 102170386, 102171476, 102172564, 102168209, 102186696, 102190536, 102171912, 102177061, 102169656, 102187027, 102180871, 102186579, 102175046, 102176894, 102184947, 102170311, 102174912, 102187260, 102175568, 102174633, 102178315, 102185098, 102187431, 102187397, 102189213, 102…	3618	255	8897	1.11865	1	0.319105	0.281401
KEGG_PATHWAY	chx04916:Melanogenesis	49	0.430997	0.0812274	102188104, 108637658, 102186040, 102180221, 102188824, 102183893, 102187776, 102176762, 102182514, 102173379, 108638619, 102174829, 102185084, 102185007, 102169697, 102183745, 100860765, 102169259, 102185715, 102175285, 102187819, 102187180, 102177945, 102189698, 102169966, 102186145, 102189653, 102171922, 102180281, 102186668, 102184049, 102175498, 102184919, 100861386, 102188083, 102174961, 100…	3618	100	8897	1.20496	1	0.319105	0.281401
KEGG_PATHWAY	chx01200:Carbon metabolism	56	0.492568	0.0819034	102168734, 102183291, 102173923, 102180265, 102182403, 102187810, 102180069, 102181503, 102185429, 102189150, 102174863, 102173456, 102168803, 102187185, 102186370, 102187548, 102179919, 102169772, 102185725, 102180994, 102169810, 102187622, 102188713, 102180872, 102179922, 102187618, 102174799, 102190144, 102191475, 102171321, 102177788, 102171124, 102169807, 102183195, 102168433, 102168710, 102…	3618	116	8897	1.18715	1	0.319105	0.281401
KEGG_PATHWAY	chx04910:Insulin signaling pathway	66	0.580526	0.082765	102189677, 102186040, 108635517, 108633219, 102188824, 102183771, 102182403, 102180932, 100861087, 100861286, 102185429, 102177054, 102172049, 100860908, 102173379, 108638619, 102185007, 102187548, 100861337, 102191828, 102169697, 102188710, 102176334, 102169370, 102176299, 102175285, 102187180, 102170356, 102175206, 106503587, 102179643, 102187475, 102189930, 102186420, 102191814, 102186668, 102…	3618	139	8897	1.16763	1	0.319105	0.281401
KEGG_PATHWAY	chx04713:Circadian entrainment	48	0.422201	0.0849436	102188104, 102188365, 102169966, 102189653, 102189312, 102186145, 102185490, 102171922, 102186040, 102181452, 102188824, 102184768, 102183232, 102184123, 102169841, 102176762, 102184919, 102181789, 102176463, 102190190, 102177097, 102186081, 102187070, 102173379, 102170924, 102187163, 102185084, 102169739, 102185469, 102185007, 102169697, 102185724, 102187248, 100860765, 108633189, 102180724, 102…	3618	98	8897	1.20445	1	0.323906	0.285634
KEGG_PATHWAY	chx04211:Longevity regulating pathway	44	0.387017	0.0860147	102188104, 102185072, 102171922, 100861309, 100860838, 102180441, 102180221, 102186668, 102183893, 108634241, 102169203, 100861301, 102184919, 102180777, 102177551, 102177054, 102171671, 102173379, 102175632, 102190378, 102188214, 102186333, 102174829, 100860904, 102185469, 102183745, 100861234, 100846984, 102188710, 102182675, 102180724, 102173122, 102175660, 102174096, 100861392, 102178739, 102…	3618	89	8897	1.21573	1	0.324425	0.286092
KEGG_PATHWAY	chx05418:Fluid shear stress and atherosclerosis	68	0.598118	0.0873042	100860957, 100860758, 102172719, 102183451, 102187813, 100861006, 102178383, 102182688, 100861289, 100860996, 102181113, 100860951, 102178149, 100861087, 102171591, 102180534, 102173536, 102175799, 102173178, 102179831, 102174268, 102174708, 102184232, 102185007, 102169697, 102176291, 102184510, 102188710, 102172251, 100861254, 102182609, 102175569, 102171520, 108637838, 102186420, 102184364, 102…	3618	144	8897	1.16124	1	0.325748	0.287259
KEGG_PATHWAY	chx05145:Toxoplasmosis	54	0.474976	0.0893211	102172719, 102189356, 102186442, 102188267, 102173967, 102186040, 102182240, 102183372, 102188824, 102168376, 102180664, 100860996, 100861087, 102171591, 102169582, 102191364, 102189962, 100860849, 102184510, 102186579, 100860765, 100861254, 102186727, 100861293, 102179246, 106503587, 102178315, 102189930, 100860813, 102186145, 102171801, 102184966, 102185412, 102180684, 102177432, 102179937, 102…	3618	112	8897	1.18563	1	0.327969	0.289217
KEGG_PATHWAY	chx04940:Type I diabetes mellitus	31	0.272671	0.0897897	100860813, 102186442, 102184760, 102189356, 102188267, 102171703, 100860816, 102180584, 108634241, 102180664, 100861289, 108638467, 108633178, 108638461, 102171130, 102176782, 102179937, 102170045, 102170848, 102175817, 102168905, 102188814, 102176598, 102176752, 102180548, 102186727, 102177285, 100861293, 102179143, 102172138, 102176878	3618	60	8897	1.27053	1	0.327969	0.289217
KEGG_PATHWAY	chx04012:ErbB signaling pathway	42	0.369426	0.0942651	102189677, 102189930, 102185177, 102186140, 102186040, 102180661, 102186668, 102184349, 102188824, 100860973, 100861087, 102176762, 102181989, 102177551, 102172767, 102175799, 102173178, 102179898, 102185462, 108638619, 102170408, 102169956, 102185084, 100860904, 102182530, 102185866, 100861234, 102188710, 102182675, 102181878, 102169370, 102180601, 102181217, 102185715, 102175285, 102170135, 102…	3618	85	8897	1.21508	1	0.340729	0.30047

## Sheet: KEGG_C2
Category	Term	Count	%	PValue	Genes	List Total	Pop Hits	Pop Total	Fold Enrichment	Bonferroni	Benjamini	FDR
KEGG_PATHWAY	chx05322:Systemic lupus erythematosus	46	0.791194	0.000160615	108633414, 102187279, 108633412, 102188267, 108633413, 102189079, 108634441, 102169782, 102188569, 102180587, 108633554, 102187998, 108634443, 108634442, 102173292, 102178586, 106503499, 102171353, 102188114, 102183280, 102184572, 106503481, 102191748, 102181383, 108634439, 102184017, 102180110, 108634231, 102169573, 102186813, 108634456, 102182458, 108636012, 102185049, 102189503, 102181912, 102…	1585	150	8897	1.7214	0.0531488	0.0547695	0.0546089
KEGG_PATHWAY	chx04613:Neutrophil extracellular trap formation	57	0.980392	0.000421672	108633414, 108633412, 102172719, 108633413, 102189079, 102169782, 102180587, 102178149, 102173292, 102178586, 106503499, 102171353, 102188114, 108638619, 102191748, 102185480, 102180110, 102169573, 108634456, 102182458, 100861213, 102185049, 102181444, 102181912, 102180505, 102182848, 102172214, 106503501, 102178870, 108633916, 102186170, 102173987, 102169966, 108634441, 108633554, 102168873, 108…	1585	205	8897	1.56076	0.133591	0.0668122	0.0666162
KEGG_PATHWAY	chx05034:Alcoholism	56	0.963192	0.00058779	108633414, 108633412, 102189312, 108633413, 102189079, 102180782, 102169782, 102180587, 100861005, 102180223, 102181789, 102190190, 102177097, 102171671, 102178586, 106503499, 102171353, 102188114, 108638619, 102191748, 102180110, 102169573, 108634456, 102182458, 102185049, 102181912, 102182848, 102172214, 102170356, 106503501, 102178870, 108633916, 102186170, 102170199, 102173026, 102186145, 108…	1585	203	8897	1.54848	0.181193	0.0668122	0.0666162
KEGG_PATHWAY	chx05206:MicroRNAs in cancer	64	1.10079	0.00449813	104796270, 102184185, 104796273, 102187214, 104795703, 104795747, 104795743, 104795700, 104795744, 102177770, 104795702, 104795784, 102190550, 104795742, 104797245, 102171716, 108638619, 102187300, 102184232, 102169535, 102188116, 100861254, 104797235, 104796268, 102170356, 104796269, 104795775, 104795731, 104796582, 102173344, 106503587, 104796583, 104795770, 104797261, 104797260, 104797263, 100…	1585	259	8897	1.38706	0.784073	0.383465	0.382341
KEGG_PATHWAY	chx00790:Folate biosynthesis	15	0.257998	0.0111989	102172669, 102189495, 102187504, 102188418, 102187204, 102187646, 102187932, 102189447, 102178311, 102177793, 108633281, 102176340, 102184739, 102177638, 102176029	1585	42	8897	2.00473	0.978271	0.763762	0.761522
KEGG_PATHWAY	chx03020:RNA polymerase	12	0.206398	0.0184304	102187892, 102190767, 106503769, 102170812, 102179362, 102168682, 102183651, 102190609, 102186665, 100861003, 100861345, 100861038	1585	32	8897	2.10497	0.998209	1	1
KEGG_PATHWAY	chx05150:Staphylococcus aureus infection	25	0.429997	0.0230939	102168858, 102187279, 102188267, 102176161, 102169785, 102188569, 102187998, 100861169, 102179515, 100861381, 102170003, 102175613, 102178207, 106503481, 102186813, 102186356, 100861213, 102181444, 102169231, 102172115, 106501743, 102175327, 102173987, 102171106, 102176457	1585	90	8897	1.55924	0.999645	1	1
KEGG_PATHWAY	chx01100:Metabolic pathways	317	5.45236	0.0293045	102168613, 102168734, 102174619, 102182243, 102187932, 102182004, 102170380, 102176244, 102179638, 102175034, 102168293, 102174503, 102178306, 102170704, 102170823, 100860927, 100861215, 102181043, 102189207, 102180994, 102181600, 102188116, 102180992, 102189447, 102188238, 102177102, 102178311, 102191071, 102180505, 102175162, 102175965, 102187381, 102179885, 102173786, 102189456, 102169807, 102…	1585	1623	8897	1.09636	0.999959	1	1
KEGG_PATHWAY	chx00980:Metabolism of xenobiotics by cytochrome P450	21	0.361197	0.0314155	108637838, 100860758, 102190811, 102172669, 102186197, 102170823, 102175171, 102185988, 102168522, 102181105, 102182665, 102179701, 102170282, 102178311, 108633281, 106503208, 102180835, 102190481, 102170554, 106503221, 102174444	1585	74	8897	1.59295	0.999981	1	1
KEGG_PATHWAY	chx00520:Amino sugar and nucleotide sugar metabolism	16	0.275198	0.0396026	102169207, 102187774, 102185360, 102180045, 102180362, 102184684, 102168356, 102181740, 102182884, 102175034, 102185429, 102178496, 102173084, 102171423, 102175965, 102189150	1585	53	8897	1.69457	0.999999	1	1
KEGG_PATHWAY	chx05203:Viral carcinogenesis	50	0.859993	0.0544101	108633414, 102184185, 102174819, 102189079, 102184382, 102180584, 102180587, 102172121, 102172568, 102171671, 106503773, 102188114, 102174905, 102180110, 102186814, 102169573, 108634456, 102182975, 102181202, 102185917, 102181912, 102171483, 102172138, 102172214, 102170356, 102178672, 102186170, 102170199, 102189930, 108634441, 102186668, 102188889, 108634443, 108634442, 102191386, 102170562, 102…	1585	221	8897	1.26997	1	1	1
KEGG_PATHWAY	chx05231:Choline metabolism in cancer	25	0.429997	0.0581406	102187595, 102187410, 102189576, 100860911, 106503491, 102186668, 102188846, 102183874, 102178149, 102176748, 102175216, 102169319, 108638619, 102170408, 102184232, 102187867, 100860943, 102182675, 100861391, 102178739, 102174559, 102170356, 102190520, 102176556, 102190345	1585	98	8897	1.43195	1	1	1
KEGG_PATHWAY	chx00514:Other types of O-glycan biosynthesis	14	0.240798	0.0626003	102185013, 102187220, 102186274, 100860927, 100861039, 102181651, 102176050, 100861310, 102181630, 102173105, 102191101, 102173322, 102172883, 102170783	1585	47	8897	1.67203	1	1	1
KEGG_PATHWAY	chx04215:Apoptosis - multiple species	11	0.189198	0.079366	102171716, 106501717, 102170408, 100861254, 102169582, 102171367, 102178560, 102186627, 102181963, 102170562, 102190168	1585	35	8897	1.76416	1	1	1
KEGG_PATHWAY	chx04623:Cytosolic DNA-sensing pathway	17	0.292398	0.0926988	108636629, 102190767, 102185184, 102179362, 102168682, 102189528, 102183651, 102168464, 102186665, 100861003, 100861345, 108633243, 102181421, 106503769, 106503773, 102174842, 102171058	1585	64	8897	1.49102	1	1	1
KEGG_PATHWAY	chx04913:Ovarian steroidogenesis	17	0.292398	0.0926988	102187595, 102170823, 102189495, 100860838, 100861413, 102187504, 102187867, 102188418, 100860793, 102187204, 102186579, 102187932, 102180531, 102180724, 102176340, 102177638, 102175216	1585	64	8897	1.49102	1	1	1
KEGG_PATHWAY	chx01230:Biosynthesis of amino acids	19	0.326797	0.0966448	102170704, 102184075, 102168943, 102173979, 102169807, 102180994, 100860854, 100860853, 102176585, 102183713, 102174691, 102191174, 102179594, 102172599, 102186091, 102171699, 102190495, 102175812, 102178731	1585	74	8897	1.44124	1	1	1
KEGG_PATHWAY	chx00511:Other glycan degradation	8	0.137599	0.0994363	102177389, 102179944, 102178493, 102183410, 102180045, 102189848, 102188734, 102179566	1585	23	8897	1.95243	1	1	1

## Sheet: KEGG_C3
Category	Term	Count	%	PValue	Genes	List Total	Pop Hits	Pop Total	Fold Enrichment	Bonferroni	Benjamini	FDR
KEGG_PATHWAY	chx04622:RIG-I-like receptor signaling pathway	66	0.781713	6.07792e-12	102181595, 102169982, 108634662, 102181625, 102171591, 102178068, 102183809, 106503773, 108634976, 108635503, 102180392, 108635507, 108635144, 108636634, 108634973, 102189208, 108636595, 102169137, 108633243, 108636630, 108633160, 102178353, 100861293, 102171046, 108636628, 108636629, 108636624, 108636625, 108636626, 108634604, 108636627, 108636620, 102181299, 100860850, 108636621, 102185736, 108…	2608	106	8897	2.1241	2.0908e-09	2.09688e-09	1.86592e-09
KEGG_PATHWAY	chx04630:JAK-STAT signaling pathway	100	1.18441	1.88481e-08	100861208, 102190308, 102184426, 102181435, 102182764, 102169142, 108634976, 108635144, 108636634, 108634973, 102185884, 102189208, 108636595, 108633243, 108636630, 100861293, 102175569, 102176415, 102190023, 102191659, 102181299, 102182821, 108635455, 102180761, 108635454, 102175057, 102168391, 108633271, 102176382, 108634918, 102180492, 108635561, 102179668, 102179943, 100861230, 102188492, 102…	2608	209	8897	1.63226	6.48371e-06	3.25129e-06	2.89318e-06
KEGG_PATHWAY	chx05165:Human papillomavirus infection	148	1.75293	5.60458e-07	102191119, 100860751, 102180584, 102183453, 102184426, 102188627, 102180102, 102185906, 102171591, 102171074, 102191085, 102173018, 102179198, 102187092, 102176768, 106502961, 102170540, 102173379, 102180190, 102189202, 102178708, 100861216, 108636634, 102189208, 100846984, 102182533, 108633243, 102181202, 102169259, 102185917, 102182009, 100861297, 106502979, 102175285, 102174073, 102178670, 102…	2608	356	8897	1.41823	0.000192779	6.44527e-05	5.73536e-05
KEGG_PATHWAY	chx04060:Cytokine-cytokine receptor interaction	141	1.67002	8.49014e-07	102179590, 100861208, 102191637, 102184942, 102181435, 102182764, 102188865, 102191364, 102189962, 108634976, 102185640, 102180231, 102182135, 108635144, 102183463, 108636634, 108634973, 102169777, 102189208, 108636595, 100860886, 108633243, 108636630, 102178953, 100862660, 102183735, 100861293, 102178672, 102173944, 102172733, 102190023, 102186186, 102181299, 102182821, 108635455, 102180761, 108…	2608	338	8897	1.42311	0.000292018	7.32274e-05	6.51618e-05
KEGG_PATHWAY	chx04014:Ras signaling pathway	102	1.2081	8.40603e-06	102189677, 102187410, 102189319, 102184426, 102184306, 102185873, 102178149, 102171591, 102181789, 102169384, 102171599, 102189031, 102178783, 102173379, 102177853, 102185645, 102169895, 102169892, 102181834, 100862660, 102181436, 102174470, 102175285, 102170311, 100860919, 102185411, 102183115, 102178569, 102168391, 102174087, 102177991, 102173438, 102191660, 102175216, 102171933, 102170206, 102…	2608	238	8897	1.46204	0.00288751	0.000580016	0.00051613
KEGG_PATHWAY	chx05169:Epstein-Barr virus infection	92	1.08966	2.1125e-05	108633459, 102186442, 102188267, 102173967, 102171703, 102181595, 102169982, 100860751, 102180584, 102186169, 102171591, 102190470, 102171356, 102173018, 102181909, 102183809, 106503773, 102175799, 102173178, 102171716, 108636634, 102188317, 102189208, 100846984, 102180277, 102169137, 102188710, 108633243, 102181202, 102185917, 100861254, 108633160, 102186727, 102173623, 102175448, 102173900, 108…	2608	214	8897	1.46659	0.00724072	0.00121469	0.00108089
KEGG_PATHWAY	chx05320:Autoimmune thyroid disease	35	0.414545	7.98222e-05	108633459, 102187356, 102186442, 102184760, 102188267, 102171703, 108636627, 102181299, 100860850, 108636621, 102180584, 102180761, 108638467, 108633178, 102171130, 102182976, 102176782, 102174842, 102170045, 106503481, 102175817, 108635529, 108633505, 102168343, 102188814, 102183249, 100750237, 102181347, 102181202, 102176598, 102185917, 102179943, 108633160, 102186727, 102177285	2608	65	8897	1.83692	0.0270863	0.00393409	0.00350077
KEGG_PATHWAY	chx04510:Focal adhesion	86	1.0186	0.000114507	102189677, 108635635, 102191119, 102188740, 102183372, 102189153, 100860838, 102188824, 102184426, 102168376, 102178060, 102185710, 100861163, 102178149, 102181229, 102171074, 102191085, 102190470, 102179198, 102177814, 102176802, 102176966, 102179873, 102176601, 102170540, 102174268, 102180190, 102184232, 102182890, 102185645, 100861216, 108634775, 102188710, 102174079, 100861254, 102176451, 102…	2608	205	8897	1.43113	0.0386269	0.00493813	0.00439422
KEGG_PATHWAY	chx04010:MAPK signaling pathway	115	1.36208	0.000248349	102186443, 102189319, 102184426, 102168334, 102185873, 102178149, 102171591, 102177850, 102174186, 102177056, 102169384, 106501756, 102173139, 102171599, 102191364, 102175799, 102175557, 102188180, 102173379, 102177853, 102190654, 102189962, 102172849, 102181161, 102168441, 102185645, 102169895, 102178150, 102184834, 108636199, 102174475, 100862660, 102181436, 102175285, 102176130, 102173700, 102…	2608	294	8897	1.3344	0.0818941	0.00952003	0.00847145
KEGG_PATHWAY	chx05414:Dilated cardiomyopathy	45	0.532986	0.000312201	102175908, 106503290, 100860838, 102184468, 102182201, 102185415, 102181695, 102178060, 102185499, 102169305, 102187558, 102176587, 102173472, 102180712, 102171074, 102184919, 102176320, 102178827, 102181869, 102191364, 102172403, 102179873, 106502520, 102173379, 102179435, 102178403, 102180190, 102189962, 102172849, 102174706, 102185261, 102169839, 102181161, 102185469, 102169019, 108633189, 102…	2608	95	8897	1.61594	0.101846	0.0105306	0.00937069
KEGG_PATHWAY	chx04151:PI3K-Akt signaling pathway	139	1.64633	0.000335758	102191119, 100860751, 102189319, 102184426, 102182400, 102171591, 102171074, 102169384, 102177054, 102191085, 102179198, 102171599, 102190431, 102170540, 102177853, 102180190, 102185645, 100861216, 102169895, 108636634, 102189208, 102182533, 108633243, 100862660, 100861297, 102175285, 102174073, 102178032, 102180907, 102178670, 102179246, 102169526, 102171801, 102172617, 102181695, 102181299, 102…	2608	368	8897	1.28856	0.109097	0.0105306	0.00937069
KEGG_PATHWAY	chx00564:Glycerophospholipid metabolism	48	0.568518	0.000399205	102187398, 102187595, 102187476, 102186563, 108634204, 102188141, 102171407, 102175409, 102182420, 102188869, 102168574, 108633234, 102181988, 102172088, 102175275, 106503219, 102181946, 102181908, 102189031, 102191660, 106503774, 102175216, 102171596, 102190731, 102185364, 102169713, 102189384, 102184173, 102168220, 102182111, 102188538, 102169892, 102184933, 102168288, 102189889, 102170908, 102…	2608	104	8897	1.5745	0.128338	0.0114771	0.010213
KEGG_PATHWAY	chx04666:Fc gamma R-mediated phagocytosis	45	0.532986	0.000547019	102170935, 102190402, 102187595, 106503491, 102189153, 102188141, 102188824, 102180225, 102177137, 102182759, 102178149, 102168391, 102171471, 102171472, 102184859, 102184639, 102181946, 102173438, 102176802, 102178783, 102175216, 106503410, 102169319, 102170108, 108637962, 102182970, 102182111, 102168201, 102186356, 102188413, 102188710, 102182675, 102183859, 102174079, 100861297, 102182646, 102…	2608	97	8897	1.58262	0.171573	0.0140501	0.0125026
KEGG_PATHWAY	chx04940:Type I diabetes mellitus	31	0.367168	0.00057015	108633459, 102187356, 102186442, 102184760, 102188267, 102171703, 102180584, 108638467, 108633178, 102171130, 102171032, 102176782, 102170045, 102170848, 106503481, 102175817, 108633505, 100861238, 102168343, 102188814, 102181347, 102181202, 102176598, 102176752, 102185917, 102180548, 100861232, 102178638, 102186727, 102177285, 100861293	2608	60	8897	1.76257	0.178142	0.0140501	0.0125026
KEGG_PATHWAY	chx04270:Vascular smooth muscle contraction	62	0.734336	0.000646304	102174619, 102171428, 102188141, 102187978, 102188824, 102186447, 102169423, 108636085, 102172088, 102171471, 106503219, 102177493, 102175912, 102173379, 102180150, 102174706, 102169697, 102169892, 102169019, 102170394, 102175362, 102175285, 102173062, 102172018, 100861290, 102171409, 102187595, 102169966, 102189653, 102188560, 102189616, 108637755, 102181571, 108633234, 102181773, 102181454, 102…	2608	145	8897	1.45868	0.199405	0.014865	0.0132277
KEGG_PATHWAY	chx00592:alpha-Linolenic acid metabolism	19	0.225038	0.000775291	102187595, 102169713, 108634204, 102188141, 102168220, 102182111, 102169892, 108633234, 102184764, 102172088, 102172230, 102176672, 102174470, 106503219, 102189031, 102191660, 102175216, 102171133, 102178699	2608	31	8897	2.09087	0.234176	0.0167172	0.0148759
KEGG_PATHWAY	chx05170:Human immunodeficiency virus 1 infection	91	1.07782	0.000898627	108633459, 102173967, 102171703, 102171428, 102181595, 102180584, 102188824, 102187214, 102178149, 102171591, 102190190, 102186081, 102177814, 102173377, 102188180, 102173178, 102169697, 108636634, 102189208, 100846984, 102169137, 102188710, 108633243, 102181202, 102185917, 100861297, 100861254, 108633160, 102175285, 102173900, 102178672, 102187079, 108636629, 102189930, 102191658, 102186145, 102…	2608	231	8897	1.3439	0.266015	0.0169587	0.0150908
KEGG_PATHWAY	chx05135:Yersinia infection	61	0.722492	0.000951702	106503491, 102173967, 102171746, 102181595, 102188824, 102178060, 102182759, 102178149, 102171591, 102184859, 102191283, 102177814, 102176802, 102178783, 102188180, 102175799, 106503410, 102173178, 102184353, 102180150, 102182890, 102170108, 108636634, 102189208, 102180871, 102169137, 102188710, 108633243, 102183859, 102174475, 102174079, 102176695, 102176451, 102175285, 102174559, 102170311, 102…	2608	144	8897	1.44512	0.279307	0.0169587	0.0150908
KEGG_PATHWAY	chx05200:Pathways in cancer	191	2.26223	0.000975073	100860758, 102187410, 102181392, 100860751, 102189319, 102184426, 102186169, 102187899, 102180102, 102178149, 102171591, 102176762, 102173771, 102169384, 102173018, 102171356, 102171599, 102191364, 102176768, 102170540, 102173379, 102171993, 102189445, 102189962, 102189202, 102185645, 102180077, 102169895, 102180076, 102169019, 102169137, 100846984, 102169259, 102182009, 100861297, 102175285, 100…	2608	537	8897	1.21338	0.285083	0.0169587	0.0150908
KEGG_PATHWAY	chx05410:Hypertrophic cardiomyopathy	42	0.497454	0.000983111	102175908, 102169928, 106503290, 100860838, 102184468, 102182201, 102185415, 102181695, 102178060, 102185499, 102169305, 102176587, 102173472, 102180712, 102171074, 102176320, 102178827, 102181869, 102175912, 102191364, 102172403, 102179873, 106502520, 102179435, 102178403, 102180190, 102189962, 102172849, 102171917, 102174706, 102185261, 102169839, 102181161, 102177443, 102176552, 100861232, 102…	2608	91	8897	1.5745	0.287059	0.0169587	0.0150908
KEGG_PATHWAY	chx05416:Viral myocarditis	33	0.390856	0.0010426	108633459, 102187356, 102186442, 102184760, 102188267, 102186140, 102171703, 102184468, 102180584, 102184349, 102169305, 102186326, 100861185, 102178149, 102178569, 102171130, 102176782, 102181869, 102177031, 102173438, 106502520, 102170045, 102178403, 106503481, 102175817, 108633505, 102183267, 102188814, 102183249, 102181347, 102181202, 102185917, 102186727	2608	67	8897	1.68025	0.301515	0.0171284	0.0152418
KEGG_PATHWAY	chx04620:Toll-like receptor signaling pathway	48	0.568518	0.00139493	108636629, 102184760, 102179590, 102173967, 108636627, 102181595, 102181299, 100860850, 108636621, 102184789, 102188824, 102180761, 102175057, 102171591, 102168391, 102171053, 102177056, 102177495, 102189174, 102173438, 102183809, 102178407, 106503773, 102175799, 102173178, 102174842, 102170408, 102171811, 108635529, 108636634, 102183249, 102189208, 102185423, 108633243, 102169137, 102188710, 102…	2608	109	8897	1.50228	0.381335	0.021875	0.0194656
KEGG_PATHWAY	chx04330:Notch signaling pathway	29	0.34348	0.00171532	102191579, 102189698, 102184186, 102169449, 102183479, 102174743, 102190653, 102183281, 102191545, 102189202, 102176908, 102186030, 102190715, 102184470, 102188890, 102178708, 102174191, 102180396, 102180032, 102189768, 102177885, 102179228, 102176652, 108637781, 102178013, 102177165, 102177020, 102190980, 102173344	2608	58	8897	1.70571	0.445993	0.0257299	0.0228958
KEGG_PATHWAY	chx04145:Phagosome	67	0.793557	0.00193324	102185274, 108633459, 102186442, 102188267, 102171703, 102174814, 102180584, 102178060, 102185906, 102174188, 102180974, 102173297, 102177056, 102184859, 102173216, 102174906, 102174628, 102175838, 102181202, 102185917, 102169296, 102186727, 102191393, 102173624, 102172254, 102178119, 102187356, 102185772, 102185490, 102181250, 102171404, 102181173, 102182340, 102173946, 102176937, 102185733, 102…	2608	165	8897	1.38525	0.486075	0.0277903	0.0247293
KEGG_PATHWAY	chx05167:Kaposi sarcoma-associated herpesvirus infection	81	0.959375	0.00256294	108633459, 100861208, 102171703, 102171428, 102181595, 102180584, 102188824, 102168299, 102186169, 102180102, 102171591, 102172481, 102190190, 102173018, 102186081, 102183809, 102188180, 106503773, 102175799, 102173178, 102186892, 102184232, 102182890, 102169697, 108636634, 102189208, 100846984, 102169137, 102188710, 108633243, 102182258, 102181202, 102185917, 102183977, 108633160, 102175285, 102…	2608	208	8897	1.32849	0.58637	0.0353686	0.031473
KEGG_PATHWAY	chx05163:Human cytomegalovirus infection	92	1.08966	0.00297426	108633459, 102179590, 102171703, 102171428, 102181595, 102180584, 102188824, 102183893, 102186169, 102178149, 102171591, 102181502, 102190190, 102173018, 102186081, 102177814, 102171671, 102188180, 102173379, 102180150, 102182890, 102169697, 108636634, 102189208, 102169019, 100846984, 102169137, 102188710, 108633243, 102181202, 102185917, 100861297, 108633160, 102176451, 102175285, 102170356, 102…	2608	242	8897	1.29691	0.641085	0.0383157	0.0340954
KEGG_PATHWAY	chx05224:Breast cancer	61	0.722492	0.00302485	102184186, 102189677, 102179273, 100860838, 102188824, 102168896, 102186169, 102180102, 102169384, 102171356, 102173018, 102171599, 102176768, 102177417, 102186892, 102189202, 102180396, 102189768, 102188317, 100846984, 102188710, 102169259, 102182009, 100861297, 102175285, 102177020, 102170356, 102177945, 102173344, 102189698, 102191579, 102188440, 102180282, 102180281, 102186668, 102168391, 102…	2608	150	8897	1.38731	0.647295	0.0383157	0.0340954
KEGG_PATHWAY	chx04650:Natural killer cell mediated cytotoxicity	63	0.74618	0.00310968	102189677, 100861208, 102171746, 102190308, 102181595, 102188824, 108638467, 108633178, 102178149, 102171153, 102176802, 102178783, 102188180, 108636634, 102189208, 102188710, 108633243, 102176695, 108633160, 102175285, 102170356, 102173900, 102170313, 102170874, 102177428, 108636749, 102186067, 108636629, 102185892, 108635459, 102177708, 108636627, 102181299, 100860850, 108636621, 102186668, 108…	2608	156	8897	1.37769	0.65747	0.0383157	0.0340954
KEGG_PATHWAY	chx04360:Axon guidance	71	0.840933	0.0033486	102169825, 102168932, 102181196, 102168298, 102184349, 102188824, 102183496, 102181473, 102178060, 102169225, 102183457, 102178149, 102176762, 102177330, 102173931, 102187092, 102177814, 102179156, 102173812, 102191685, 102174862, 102177853, 102174785, 102171839, 102184034, 102182890, 102182014, 102188710, 102185715, 102171324, 106503424, 102186490, 102173388, 102176216, 102185098, 102183390, 102…	2608	180	8897	1.34562	0.684581	0.0398368	0.035449
KEGG_PATHWAY	chx05330:Allograft rejection	26	0.307947	0.00438499	108633459, 102187356, 102186442, 102184760, 102188267, 102171703, 102180584, 108638467, 108633178, 102171130, 102176782, 102170045, 106503481, 102175817, 108633505, 102168343, 102188814, 102183249, 102181347, 102181202, 102176598, 102185917, 100861232, 102186727, 102177285, 100861293	2608	53	8897	1.67353	0.779477	0.0504274	0.0448731
KEGG_PATHWAY	chx04623:Cytosolic DNA-sensing pathway	30	0.355324	0.00465788	108636629, 102190767, 108636627, 102181595, 102181299, 100860850, 108636621, 102183651, 100861003, 102180761, 102171591, 102183809, 102178407, 102172585, 106503773, 102174842, 102171811, 108635529, 102179362, 102168682, 102168464, 108636634, 102189208, 108633243, 102169137, 102181421, 102179943, 108633160, 102177406, 102173387	2608	64	8897	1.59911	0.799322	0.0518377	0.046128
KEGG_PATHWAY	chx04810:Regulation of actin cytoskeleton	87	1.03044	0.00521143	102188740, 106503491, 102179273, 102187978, 102188824, 102184426, 102178060, 102168896, 102185873, 102180225, 102183974, 102187899, 102185710, 100861163, 102182759, 102178149, 102171074, 102171274, 102180975, 102169384, 102177011, 102177493, 102174669, 102171599, 102177814, 102176802, 102176966, 102179873, 106503410, 102190079, 102174268, 102186892, 102180190, 102186374, 102184232, 102180150, 102…	2608	231	8897	1.28482	0.834274	0.0554555	0.0493474
KEGG_PATHWAY	chx05152:Tuberculosis	72	0.852777	0.0053493	106504021, 102186442, 102188267, 102171428, 102174814, 102181595, 102188824, 102184789, 102180544, 102176762, 102177056, 102184859, 102191364, 102189962, 102185560, 102182890, 102170987, 102169697, 102168201, 108636634, 102189208, 100846984, 100861213, 108633243, 102181444, 100861254, 108633160, 102185715, 102186727, 100861293, 102191393, 102190023, 102172254, 108636629, 102189930, 102187356, 102…	2608	186	8897	1.32055	0.84199	0.0554555	0.0493474
KEGG_PATHWAY	chx04020:Calcium signaling pathway	89	1.05413	0.00588599	102175906, 102171428, 102179273, 102187374, 102177052, 102184426, 102185318, 102168896, 102185434, 102168898, 102187899, 102176762, 108637010, 102181789, 102169384, 102172049, 102173853, 102171599, 102172881, 102177975, 102173379, 102174268, 102186892, 102184232, 102174706, 102189285, 102185645, 102185689, 102168441, 100861337, 102169697, 102168201, 102184834, 102185124, 102169019, 102181834, 100…	2608	238	8897	1.2757	0.868765	0.0554555	0.0493474
KEGG_PATHWAY	chx00051:Fructose and mannose metabolism	18	0.213194	0.00595474	102172736, 102190759, 102173959, 102187622, 102182403, 102168356, 102187016, 102188457, 102188810, 102178003, 102168393, 102178496, 102180808, 102186091, 102173930, 102175765, 102187190, 102173368	2608	33	8897	1.86078	0.87185	0.0554555	0.0493474
KEGG_PATHWAY	chx04936:Alcoholic liver disease	60	0.710648	0.00595489	102189753, 102188588, 102187210, 102173967, 102181595, 102189519, 102178140, 102184789, 100861288, 102180102, 102171591, 102177056, 102174989, 102183809, 100860908, 102175799, 102173178, 108636634, 102186813, 102183463, 102187545, 102189208, 102169137, 108633243, 102177420, 108633160, 100861293, 104795772, 102173026, 108636629, 102169928, 108636627, 102182420, 102181299, 100860850, 108636621, 102…	2608	151	8897	1.35553	0.871857	0.0554555	0.0493474
KEGG_PATHWAY	chx04664:Fc epsilon RI signaling pathway	30	0.355324	0.0060958	102170935, 102187595, 102187477, 100861208, 102173967, 102188141, 102186668, 102188824, 102177137, 102178149, 102178569, 102168391, 102184639, 102189174, 102173438, 102176802, 102178783, 102175799, 102175216, 102173178, 102170408, 102188710, 102168425, 100861232, 102175285, 102180926, 102174051, 102170135, 102170356, 102177428	2608	65	8897	1.5745	0.877956	0.0554555	0.0493474
KEGG_PATHWAY	chx04015:Rap1 signaling pathway	80	0.94753	0.00612151	102187410, 102173967, 102171428, 102179273, 102189153, 100860838, 102184425, 102188824, 102183255, 102184426, 102178060, 102168896, 102185873, 102186007, 102178149, 102181789, 102169384, 102187092, 102171599, 102176802, 102178783, 102177853, 102174268, 102186892, 102173818, 102184232, 102182890, 102185645, 102169697, 102169019, 102188710, 102186655, 100862660, 102176451, 102175285, 102178670, 102…	2608	211	8897	1.29343	0.879037	0.0554555	0.0493474
KEGG_PATHWAY	chx04512:ECM-receptor interaction	41	0.485609	0.00626888	108635635, 102191119, 102171801, 102183372, 108634846, 102185415, 102181695, 108633195, 102186825, 102168376, 102178060, 102169403, 102185499, 102185378, 102188028, 102176587, 102181229, 102171074, 102175890, 102184914, 102191085, 102179198, 102174446, 102170540, 102178403, 102180190, 102190117, 102170822, 102169839, 100861216, 108633363, 102170928, 108634775, 102182426, 102190083, 102174073, 102…	2608	96	8897	1.45696	0.885053	0.0554555	0.0493474
KEGG_PATHWAY	chx04920:Adipocytokine signaling pathway	32	0.379012	0.0068586	102187210, 102169928, 102177271, 100860794, 100861288, 102183996, 102171591, 102179979, 102182514, 102178200, 102181909, 102174800, 102179952, 102189445, 102188214, 100860902, 102186154, 102170408, 102174704, 102183003, 102184255, 102169137, 102181421, 102181437, 100861232, 102175460, 100861392, 102174051, 102173644, 102170730, 102177406, 102173026	2608	71	8897	1.53754	0.906284	0.0578511	0.0514791
KEGG_PATHWAY	chx04658:Th1 and Th2 cell differentiation	38	0.450077	0.00704275	102184186, 102187477, 102187356, 102186442, 102188267, 102171746, 102188824, 102171591, 102176287, 102180958, 102176382, 102170124, 102181909, 102189174, 102178783, 102188180, 102191545, 102170408, 102189202, 106503481, 102186030, 102180396, 102180571, 102189768, 102185423, 102169137, 102181421, 102172253, 102176695, 102180926, 102186727, 100861293, 102177020, 102188492, 102175448, 102173900, 102…	2608	88	8897	1.47312	0.912075	0.0578511	0.0514791
KEGG_PATHWAY	chx05235:PD-L1 expression and PD-1 checkpoint pathway in cancer	38	0.450077	0.00704275	102187234, 102173967, 102171746, 102190308, 102174419, 102177271, 102186668, 102184789, 102188824, 102171591, 102168391, 102180958, 102170124, 102181909, 102189174, 102178783, 102173036, 102188180, 102169319, 100860902, 102186154, 102183444, 102168321, 102185423, 102169137, 102188710, 102181421, 102182675, 102176695, 100861297, 102175285, 102180926, 102174051, 102170135, 102170774, 102173900, 106…	2608	88	8897	1.47312	0.912075	0.0578511	0.0514791
KEGG_PATHWAY	chx01522:Endocrine resistance	40	0.473765	0.0112012	102184186, 102189677, 102189930, 102179593, 100860838, 102186668, 102188824, 102186169, 108636541, 102168391, 102184919, 102173018, 102189174, 102177814, 102173379, 102169319, 100860902, 102170408, 102170926, 102189202, 102169956, 102182890, 102185469, 102180396, 102189768, 102169019, 100846984, 102185423, 102188710, 102182675, 108633189, 100861297, 100861254, 102175285, 102180926, 102177020, 102…	2608	96	8897	1.42143	0.979245	0.0898703	0.0799716
KEGG_PATHWAY	chx04662:B cell receptor signaling pathway	30	0.355324	0.0127602	102170935, 102185210, 102190308, 102186668, 102188824, 102178149, 102171591, 102178569, 102168391, 102180958, 102184639, 102181909, 102173438, 102176802, 102190375, 102188180, 102177060, 102186356, 102185423, 102180277, 102169137, 102188710, 102181421, 102171241, 102175285, 102174051, 102170135, 102170356, 102177428, 102177406	2608	68	8897	1.50504	0.987939	0.0992166	0.0882884
KEGG_PATHWAY	chx04921:Oxytocin signaling pathway	59	0.698804	0.0129413	102175908, 102171428, 102188141, 106503290, 102182201, 102188824, 102185318, 102168299, 102186447, 102182956, 102172481, 102176762, 102174425, 102172403, 102188180, 102172881, 102173379, 102172849, 102174706, 102182890, 102169739, 102181161, 102169697, 102185124, 102169019, 102170394, 102176650, 102185715, 102175285, 102173026, 102171409, 102187595, 102169966, 102186145, 102189653, 102169928, 102…	2608	153	8897	1.31552	0.988676	0.0992166	0.0882884
KEGG_PATHWAY	chx00220:Arginine biosynthesis	12	0.14213	0.0141897	102173681, 100860879, 102185490, 102171613, 102188907, 102173979, 102185338, 102191069, 102188116, 100860853, 100860742, 102185952	2608	20	8897	2.04686	0.992673	0.105833	0.0941756
KEGG_PATHWAY	chx05145:Toxoplasmosis	45	0.532986	0.0144178	102189930, 102187356, 102186442, 102186145, 102188267, 102171801, 102173967, 102183372, 102187374, 102188824, 102168376, 102178060, 102185412, 102171591, 102172481, 102177850, 102169582, 102184914, 102177031, 102189174, 102191364, 102170540, 102172509, 102189962, 102186154, 102170408, 106503481, 100860849, 102183249, 102169137, 102181421, 102168425, 100860742, 100861254, 100861232, 102180926, 102…	2608	112	8897	1.37066	0.993234	0.105833	0.0941756
KEGG_PATHWAY	chx04910:Insulin signaling pathway	54	0.639583	0.0150101	102189677, 102171428, 108633219, 102188824, 102182403, 100861288, 102178945, 102185429, 102177054, 102172049, 100860908, 102173379, 102179952, 100860801, 102174704, 100861337, 102191828, 102169697, 102188710, 102176299, 100861297, 102175285, 102170356, 102187475, 102189930, 102169928, 102185139, 102186668, 102180441, 102181571, 102168356, 102188204, 102168391, 102179979, 102178200, 102190697, 102…	2608	139	8897	1.3253	0.994498	0.107885	0.0960018
KEGG_PATHWAY	chx05231:Choline metabolism in cancer	40	0.473765	0.0162848	102187595, 102187476, 102187410, 102186563, 102189576, 106503491, 102188141, 102186668, 102188824, 102184426, 102178149, 102178569, 102168391, 102175275, 102180315, 102181946, 102176748, 102173438, 102175216, 102174268, 102169319, 100860902, 102170408, 102184232, 102189384, 102184173, 102185423, 102188710, 102182675, 102183859, 102174079, 100861297, 102175285, 102174051, 102170135, 102174559, 102…	2608	98	8897	1.39242	0.996476	0.114659	0.10203
KEGG_PATHWAY	chx05226:Gastric cancer	58	0.68696	0.0172935	102189677, 102179273, 100860751, 102188824, 102168896, 102186169, 102180102, 102169384, 102171356, 102173018, 102171599, 102191364, 102176768, 102177417, 102189445, 102186892, 102189962, 102180076, 102188317, 100846984, 102188710, 102169259, 102169293, 102182009, 100861297, 100861254, 102175285, 106502019, 102170356, 102177945, 102189698, 102188440, 102180281, 102186668, 108637277, 102168391, 102…	2608	152	8897	1.30173	0.997524	0.117513	0.10457
KEGG_PATHWAY	chx05205:Proteoglycans in cancer	77	0.911998	0.0173715	102190027, 108635635, 102190308, 100860838, 102188824, 102178060, 102185873, 102181158, 102176762, 102177814, 102176802, 102191364, 102176768, 102176601, 102173379, 102186892, 102180150, 102182890, 100861216, 108634775, 102188710, 102169259, 102182009, 100861297, 102185715, 102175285, 102189719, 102170356, 102177428, 102177945, 102187630, 102188440, 102180282, 102189650, 102179053, 108634846, 102…	2608	210	8897	1.25086	0.99759	0.117513	0.10457
KEGG_PATHWAY	chx04072:Phospholipase D signaling pathway	56	0.663271	0.0200323	102189677, 102187410, 102188141, 102188824, 102184426, 102185873, 102182961, 102177137, 102172481, 102175275, 102181946, 102178660, 102174268, 102185364, 102184232, 102168201, 102169019, 102188710, 102174079, 102175285, 102174559, 102170311, 102170356, 102171485, 102190402, 102187595, 102185451, 102169966, 102189653, 102185018, 102186668, 102183630, 102177271, 102187119, 102184366, 102168391, 102…	2608	147	8897	1.29959	0.999052	0.132906	0.118267
KEGG_PATHWAY	chx05161:Hepatitis B	62	0.734336	0.0222037	102173967, 102181595, 100860751, 102188824, 102184789, 102183893, 102186169, 102171591, 102171356, 102173018, 102191364, 102183809, 102171671, 102188180, 106503773, 102175799, 102173178, 102189962, 102182890, 102180077, 108636634, 102189208, 100846984, 102169137, 102188710, 108633243, 102169293, 100861254, 108633160, 102175285, 102170356, 102176415, 108636629, 102189930, 108636627, 102181299, 100…	2608	166	8897	1.27415	0.999558	0.143728	0.127897
KEGG_PATHWAY	chx04912:GnRH signaling pathway	37	0.438233	0.0224965	102187595, 102169966, 102189653, 102173967, 102171428, 102188141, 102186668, 102188824, 102176762, 102171471, 102184919, 102189174, 102173036, 102175799, 102175216, 102173178, 102171992, 102173379, 102172543, 102170408, 102174706, 102182890, 102185469, 102169697, 102184810, 102187248, 100861299, 102169019, 102185423, 108633189, 102185715, 102175285, 102180926, 102170356, 102177328, 106502751, 102…	2608	91	8897	1.38706	0.999601	0.143728	0.127897
KEGG_PATHWAY	chx05417:Lipid and atherosclerosis	82	0.971219	0.023179	102179590, 102173967, 102171428, 102181595, 102188824, 102180141, 102184789, 102171591, 102176762, 102177850, 102177056, 102177814, 102176802, 102183809, 102188180, 106503773, 102175799, 102175557, 102173178, 102189445, 102180150, 102182890, 100860849, 102169697, 108636634, 102189208, 100846984, 102169137, 102188710, 108633243, 100861254, 108633160, 102185715, 100861293, 102177428, 102178315, 108…	2608	228	8897	1.22692	0.999686	0.143966	0.128109
KEGG_PATHWAY	chx04722:Neurotrophin signaling pathway	47	0.556674	0.0235648	102181070, 102189677, 102189930, 102189012, 102171428, 102177271, 102186668, 102184349, 102188824, 102180544, 102176762, 102168391, 102171471, 102191283, 102181909, 102189174, 102173438, 102173735, 102173036, 102173178, 102183480, 102184175, 102170408, 102170926, 102169956, 102169819, 102188012, 102185689, 102169697, 102187248, 100846984, 102185423, 102169137, 102188710, 102181421, 100862660, 102…	2608	121	8897	1.3251	0.999726	0.143966	0.128109
KEGG_PATHWAY	chx05221:Acute myeloid leukemia	29	0.34348	0.0237857	102189930, 102185772, 100861208, 102191659, 102186668, 102188824, 102189319, 102180102, 102171591, 102168391, 102177056, 102177713, 102173973, 102171993, 102169319, 100860902, 102186154, 102186416, 102180076, 102188710, 102182675, 102174211, 100861297, 102175285, 102174051, 102170135, 102170356, 102177406, 102176415	2608	68	8897	1.45487	0.999747	0.143966	0.128109
KEGG_PATHWAY	chx04217:Necroptosis	63	0.74618	0.0250226	102171944, 102188141, 102181595, 102176762, 102173495, 106503179, 102187344, 102180071, 102181640, 102180034, 102177061, 108636634, 102189208, 100846984, 102185049, 108633243, 108637680, 102173581, 100861254, 108633160, 102185715, 102176415, 108636629, 102190248, 102187595, 102189213, 108636627, 102181299, 100860850, 108636621, 102183998, 102180761, 102175057, 102173075, 102182977, 102183949, 106…	2608	170	8897	1.26423	0.999836	0.145493	0.129468
KEGG_PATHWAY	chx00330:Arginine and proline metabolism	24	0.284259	0.0253032	102190676, 100860804, 102185490, 102171613, 102182692, 102176816, 102185942, 102189519, 102185338, 102182385, 102169500, 102180002, 100860853, 100860742, 102184718, 102173140, 102189261, 102174989, 102176603, 102179224, 102171870, 102176898, 106503387, 102173994	2608	54	8897	1.51619	0.999852	0.145493	0.129468
KEGG_PATHWAY	chx00565:Ether lipid metabolism	24	0.284259	0.0253032	102187595, 102169713, 108634204, 102172928, 102188141, 102168220, 102182111, 102188538, 102169892, 102184933, 108633234, 102181532, 102186907, 102172088, 102172230, 102176672, 102174470, 106503219, 102181946, 102189031, 102191660, 102175216, 102176556, 102178699	2608	54	8897	1.51619	0.999852	0.145493	0.129468
KEGG_PATHWAY	chx04931:Insulin resistance	44	0.521142	0.0274317	102172839, 102187210, 102173729, 102169928, 102177271, 102185338, 102183893, 102181571, 100861288, 100861042, 102168391, 102171471, 102179979, 102178200, 102191283, 102174800, 100860908, 102179952, 102190697, 102169319, 100860902, 102186154, 102170408, 102172625, 100860906, 102174704, 102183003, 102169137, 102188710, 102187305, 102182675, 102185666, 102179624, 102174475, 102179406, 100861297, 102…	2608	113	8897	1.32834	0.99993	0.155147	0.138058
KEGG_PATHWAY	chx04930:Type II diabetes mellitus	21	0.248727	0.0282051	100860902, 102189138, 102170408, 102174706, 102187163, 102190759, 102168441, 102183003, 102188824, 102184834, 108637276, 102182403, 102168356, 102185675, 102188710, 102168391, 102171471, 100861232, 102185429, 102170135, 102177406	2608	46	8897	1.55739	0.999947	0.156948	0.139661
KEGG_PATHWAY	chx05412:Arrhythmogenic right ventricular cardiomyopathy	32	0.379012	0.0304881	102175908, 102179075, 106503290, 102184468, 102182201, 102185415, 102181695, 102178060, 102185499, 102169305, 102180102, 102176587, 102180712, 102171074, 102176320, 102172403, 102178403, 102180190, 102172849, 102174706, 102169839, 102181161, 102180076, 102181879, 102177443, 102176552, 102180626, 102176592, 102174073, 102191175, 102171644, 102175347	2608	78	8897	1.39956	0.999976	0.161822	0.143998
KEGG_PATHWAY	chx05220:Chronic myeloid leukemia	32	0.379012	0.0304881	102189677, 102189930, 102184363, 102177271, 102186668, 102184349, 102188824, 102186169, 108636541, 102177137, 102171591, 102168391, 102171356, 102173018, 102191364, 102170562, 102189962, 102170926, 102169956, 106503061, 102188317, 100846984, 102169137, 102188710, 102169293, 102177165, 102175285, 102174051, 102170135, 102170356, 102177406, 102176415	2608	78	8897	1.39956	0.999976	0.161822	0.143998
KEGG_PATHWAY	chx05100:Bacterial invasion of epithelial cells	32	0.379012	0.0304881	102190402, 102189677, 102188740, 106503491, 102182223, 102178060, 102181234, 102176587, 102182759, 102168391, 102189492, 102170400, 102177814, 102173438, 106503410, 102186298, 102170926, 102169956, 102184353, 102182890, 102170108, 102189847, 102183442, 102188710, 102177364, 102176451, 102189719, 102170135, 102175009, 102191156, 102174457, 102173323	2608	78	8897	1.39956	0.999976	0.161822	0.143998
KEGG_PATHWAY	chx05222:Small cell lung cancer	38	0.450077	0.0318155	102169328, 102171801, 102183372, 100860751, 102169983, 108633195, 102168376, 102178060, 102185499, 102186169, 102171591, 102168391, 102169582, 102184914, 102177031, 102171356, 102173018, 102177814, 102170562, 102170540, 102189445, 102171977, 102184255, 102182975, 102188317, 100846984, 102169137, 102188710, 100860742, 100861254, 102190083, 102176130, 102174051, 102170135, 102170256, 102171347, 102…	2608	96	8897	1.35036	0.999985	0.166308	0.14799
KEGG_PATHWAY	chx00260:Glycine, serine and threonine metabolism	21	0.248727	0.0359193	102187342, 102184397, 102170645, 102187185, 102189681, 102176828, 102184667, 102179919, 102168762, 102183921, 100861387, 102169216, 102182869, 102168295, 102176539, 102176603, 106501774, 102179224, 102174168, 102178128, 102178337	2608	47	8897	1.52425	0.999997	0.184958	0.164585
KEGG_PATHWAY	chx05146:Amoebiasis	45	0.532986	0.0367059	108635635, 102169966, 102189653, 102188740, 100861208, 102171801, 102174814, 102183372, 108634846, 102177052, 108633195, 102168376, 102183974, 100860853, 100861185, 102168391, 102173110, 102177056, 102184914, 102177031, 102177814, 102176966, 102191364, 102175634, 102173379, 102170540, 102189962, 102168869, 102182494, 102171613, 102176927, 108634775, 102188710, 100860742, 108633189, 100861232, 102…	2608	118	8897	1.30097	0.999997	0.186228	0.165716
KEGG_PATHWAY	chx04064:NF-kappa B signaling pathway	40	0.473765	0.0372652	102190248, 102171746, 102174419, 102184789, 102189617, 102186643, 102183854, 102181625, 100861240, 102171591, 102182977, 102177056, 102184639, 102175293, 102191581, 102178783, 102174844, 102178407, 102190375, 102189290, 100860848, 102185640, 102184255, 102182975, 102183249, 102188317, 102185543, 102189744, 102169137, 102169556, 102180548, 102176695, 106503905, 100861254, 100861232, 102170774, 102…	2608	103	8897	1.32483	0.999998	0.186326	0.165803
KEGG_PATHWAY	chx04144:Endocytosis	89	1.05413	0.038668	108633459, 102187378, 102187499, 102188223, 102171703, 102174814, 102184425, 102180584, 102183970, 102182759, 102170381, 100861362, 102177850, 102171274, 102187092, 102178660, 106503410, 102173973, 102171476, 102190796, 102190536, 102182890, 102170108, 102171957, 100860849, 102182970, 102177061, 102183540, 102187027, 102168642, 102180871, 102181202, 102185917, 102175046, 102173581, 102169293, 102…	2608	255	8897	1.19065	0.999999	0.190578	0.169587
KEGG_PATHWAY	chx05162:Measles	53	0.627739	0.0396516	102174419, 102181595, 100860751, 102169786, 102171591, 102177850, 102190470, 102183809, 106503773, 102169659, 100860849, 108636634, 102189208, 100846984, 102169137, 102188710, 108633243, 100861254, 108633160, 100861293, 102171367, 102176415, 102172254, 102178315, 108636629, 102189930, 108636627, 102181299, 100860850, 108636621, 102180761, 102185412, 102175057, 102168391, 102182977, 102177031, 102…	2608	143	8897	1.26437	0.999999	0.192673	0.171451
KEGG_PATHWAY	chx04926:Relaxin signaling pathway	50	0.592207	0.0406758	102189677, 108635635, 102177052, 102188824, 102183893, 102178269, 102190190, 102175912, 102186081, 102191364, 102171671, 102175799, 102173178, 102173379, 102182890, 102185645, 108634775, 102169019, 102169137, 102188710, 102175285, 102170356, 102169966, 102186145, 102189653, 102185490, 108634846, 102189099, 102186668, 102185338, 108633195, 102168391, 102184919, 102176185, 102173832, 102189174, 102…	2608	134	8897	1.27292	0.999999	0.194428	0.173013
KEGG_PATHWAY	chx05206:MicroRNAs in cancer	90	1.06597	0.0417915	102190027, 102191635, 104797240, 102184349, 102188824, 102184426, 102186169, 102187214, 100860951, 102185798, 104795703, 102181229, 104795704, 100860792, 104795700, 102177770, 104795702, 102173139, 102173018, 102179198, 102171555, 104795784, 102190273, 102177853, 102174268, 102171716, 102189202, 102187300, 102184232, 102187109, 102188710, 102188116, 100861254, 104795732, 102188907, 102175285, 104…	2608	259	8897	1.18544	1	0.194428	0.173013
KEGG_PATHWAY	chx04150:mTOR signaling pathway	58	0.68696	0.0425723	100860838, 102188824, 102184024, 102185906, 102171470, 102177054, 102191283, 102177816, 102173216, 102176768, 102177417, 102172562, 102175632, 102184673, 102188710, 102169259, 102174475, 102182009, 100861297, 102169296, 102184824, 102175285, 102170356, 102177945, 102189698, 102190721, 102188244, 102188440, 102180281, 102176937, 102184283, 100861347, 102182420, 102186668, 102180441, 102180643, 102…	2608	159	8897	1.24442	1	0.194428	0.173013
KEGG_PATHWAY	chx05214:Glioma	30	0.355324	0.0428072	102189677, 102171428, 100860838, 102186668, 102188824, 102184426, 102185318, 102186169, 108636541, 102176762, 102168391, 102171356, 102173018, 102170562, 102174268, 100860902, 102170926, 102169956, 102184232, 102169697, 102187248, 102188317, 100846984, 102188710, 102185715, 102175285, 102174051, 102170135, 102170356, 106502751	2608	74	8897	1.38301	1	0.194428	0.173013
KEGG_PATHWAY	chx01521:EGFR tyrosine kinase inhibitor resistance	32	0.379012	0.0432956	102189677, 102189930, 102185177, 100860838, 102180441, 102186668, 102188824, 102184426, 102168391, 102177054, 102174268, 102171716, 102186892, 102169319, 100860902, 102186154, 102170926, 102169956, 102184232, 102182890, 102184058, 100846984, 102188710, 102182675, 100861297, 100861254, 102175285, 102174051, 102170135, 102170356, 102173448, 102177449	2608	80	8897	1.36457	1	0.194428	0.173013
KEGG_PATHWAY	chx05210:Colorectal cancer	35	0.414545	0.0435906	102189930, 102187410, 102186668, 102188824, 102180102, 102178149, 102178569, 102168391, 102181726, 102177031, 102171356, 102173438, 102191364, 102170562, 102177435, 102171716, 102189962, 102169319, 100860902, 102170408, 102180077, 102188317, 100846984, 102185423, 102188710, 102182675, 102169293, 100861297, 100861254, 102175285, 102174051, 102170135, 102171367, 102170356, 102170375	2608	89	8897	1.34157	1	0.194428	0.173013
KEGG_PATHWAY	chx04210:Apoptosis	55	0.651427	0.0439576	106504021, 102188387, 102191713, 102188824, 102183854, 108638467, 108633178, 102185798, 102171591, 102173295, 102175557, 102171716, 102188158, 102180077, 102182975, 102188317, 108636199, 100846984, 102169137, 102188710, 100862660, 100861254, 102175285, 102171367, 102178119, 102170638, 102190248, 102189930, 102186582, 102186668, 102186627, 102189617, 102168391, 102171130, 102178527, 102178045, 102…	2608	150	8897	1.25086	1	0.194428	0.173013
KEGG_PATHWAY	chx05166:Human T-cell leukemia virus 1 infection	82	0.971219	0.0469663	108633459, 102186442, 102188267, 100861208, 102189430, 102171746, 102171703, 100860751, 102180584, 102188824, 102183893, 102186169, 102171591, 102172283, 102172040, 102190470, 102173018, 102191364, 102171671, 102188180, 102175799, 102173379, 102189962, 102169615, 102184470, 102186416, 108634012, 102169019, 100846984, 102169137, 102188710, 100861257, 102181202, 102185917, 102180548, 102169293, 102…	2608	235	8897	1.19037	1	0.205106	0.182514
KEGG_PATHWAY	chx00410:beta-Alanine metabolism	17	0.20135	0.0493295	102189519, 102168762, 102182385, 102183446, 102180002, 102180069, 102179701, 102182869, 102176752, 102184718, 102178638, 102168295, 102189261, 102174989, 106501774, 102179598, 102176898	2608	37	8897	1.56741	1	0.212733	0.189302
KEGG_PATHWAY	chx04970:Salivary secretion	36	0.426389	0.0507703	102169848, 102169966, 102189653, 102185490, 102171428, 102168898, 102187558, 102182418, 102184919, 102170003, 102179850, 102172881, 102170265, 102173379, 102186276, 102191649, 108633307, 102185469, 102186459, 102174093, 102187889, 102169697, 102187248, 102169019, 100860864, 100861213, 102180651, 102181444, 108633189, 100861275, 100861192, 102169231, 106503668, 100861191, 102171106, 106502751	2608	93	8897	1.32055	1	0.216244	0.192426
KEGG_PATHWAY	chx04070:Phosphatidylinositol signaling system	37	0.438233	0.0584448	102170935, 102168613, 102169966, 102189653, 102173924, 102171428, 102182123, 102180522, 102189953, 100861268, 102168391, 102178224, 102175275, 102173853, 102187085, 102189384, 102183460, 102190716, 102190639, 102184173, 102181541, 102169697, 102176070, 102185047, 102187248, 102187423, 102188710, 102174079, 102177585, 102172073, 102170135, 102174559, 102172398, 106502751, 102171485, 102174853, 106…	2608	97	8897	1.30127	1	0.245896	0.218811
KEGG_PATHWAY	chx04012:ErbB signaling pathway	33	0.390856	0.0595517	102189677, 102189930, 102185177, 102186140, 102186668, 102184349, 102188824, 100860973, 102176762, 102168391, 102177814, 102175799, 102173178, 102169319, 100860902, 102170408, 102170926, 102169956, 102182890, 102185423, 102184950, 102188710, 102182675, 100861297, 102180601, 102181217, 102185715, 102175285, 102174051, 102170135, 102170356, 102173448, 102176415	2608	85	8897	1.32444	1	0.247534	0.220269
KEGG_PATHWAY	chx04621:NOD-like receptor signaling pathway	63	0.74618	0.0617399	102187099, 102181595, 102188824, 102168578, 102171591, 102173295, 102171471, 102183809, 102173536, 106503773, 102185480, 102170987, 108636634, 102187347, 102189208, 100861213, 102169137, 108633243, 102181444, 100861254, 108633160, 102188566, 108636629, 102169966, 102189653, 102172617, 108636627, 102181299, 100860850, 108636621, 102180761, 102175057, 102182977, 102170003, 102171213, 102189174, 102…	2608	178	8897	1.20741	1	0.253575	0.225645
KEGG_PATHWAY	chx05225:Hepatocellular carcinoma	62	0.734336	0.0626198	102189677, 100860758, 102179351, 102188824, 102186169, 102182688, 102180102, 100860951, 102178103, 102173771, 102171356, 102173018, 102191364, 102176768, 102177417, 102177897, 102189962, 102186295, 102182176, 102180598, 102188317, 100846984, 102188710, 102169259, 102169293, 102182009, 100861297, 102175285, 102170356, 102177945, 102189698, 102189930, 102188440, 102180281, 102186668, 100861222, 108…	2608	175	8897	1.20862	1	0.254163	0.226168
KEGG_PATHWAY	chx04218:Cellular senescence	59	0.698804	0.0653208	108633459, 102187256, 102173967, 102171703, 102171428, 100860751, 102180584, 102188824, 102181275, 102185873, 102186169, 102174541, 106502606, 102190470, 102173018, 102191364, 102188180, 102189962, 102174706, 102169697, 102169375, 102188317, 102188710, 102181202, 102185917, 102170590, 102169293, 102175285, 100860919, 102187079, 102186668, 102186866, 102181571, 102187875, 102184366, 108636541, 102…	2608	166	8897	1.21249	1	0.259414	0.23084
KEGG_PATHWAY	chx04933:AGE-RAGE signaling pathway in diabetic complications	40	0.473765	0.0654173	108635635, 102169966, 102189653, 102170997, 102191659, 108634846, 102189099, 102185338, 102186668, 102188824, 108633195, 102168873, 102168391, 102171471, 102177031, 102175912, 102189174, 102173438, 102191364, 102188180, 102189962, 102186154, 102170408, 102175938, 102190639, 102185645, 102169375, 108634775, 100846984, 102185423, 102188710, 102169293, 100861254, 100861232, 102180926, 102190083, 102…	2608	107	8897	1.2753	1	0.259414	0.23084
KEGG_PATHWAY	chx04660:T cell receptor signaling pathway	38	0.450077	0.0665837	102188484, 100861208, 102171746, 102190308, 102186668, 102188824, 102189617, 100860973, 102171591, 102168391, 102180958, 102170124, 102181909, 102189174, 102176802, 102178783, 102190375, 102188180, 102173178, 102170408, 102168321, 102185423, 102169137, 102188710, 102181421, 102176695, 102180601, 100861232, 102181217, 102175285, 102180926, 102185639, 102174051, 102170135, 102170356, 102173900, 102…	2608	101	8897	1.28351	1	0.261038	0.232286
KEGG_PATHWAY	chx00601:Glycosphingolipid biosynthesis - lacto and neolacto series	13	0.153974	0.0679044	102191019, 102185596, 102187003, 102168846, 102181295, 100861326, 102168794, 102175162, 102191287, 102171777, 108637190, 102191101, 102190112	2608	27	8897	1.64254	1	0.263225	0.234232
KEGG_PATHWAY	chx04612:Antigen processing and presentation	32	0.379012	0.0694171	108633459, 102187356, 102179390, 102191658, 102186442, 102188267, 102181173, 102171703, 102185733, 102180584, 102185412, 102173295, 102177850, 102176782, 102180638, 102170124, 102170045, 102172509, 102185560, 106503481, 102175817, 102191527, 108633505, 102189385, 100860849, 102188814, 102181347, 102181202, 102185917, 100861232, 102186727, 102178315	2608	83	8897	1.31525	1	0.266099	0.236789
KEGG_PATHWAY	chx04550:Signaling pathways regulating pluripotency of stem cells	51	0.604051	0.072946	108635515, 100860838, 102188824, 102168334, 100860952, 102171875, 102176768, 102186892, 102172808, 100860960, 102185207, 102188710, 102169259, 102169293, 102182009, 102175285, 102174031, 100861250, 102170356, 102177945, 102191599, 102176852, 102189698, 102188440, 102180282, 102186186, 102180281, 102186668, 102168391, 102176101, 102184837, 102170202, 102189174, 102177435, 102184053, 102172948, 102…	2608	142	8897	1.22523	1	0.276554	0.246093
KEGG_PATHWAY	chx04625:C-type lectin receptor signaling pathway	38	0.450077	0.0759366	102171428, 102177271, 102186668, 102188824, 102189617, 102185873, 102184366, 102177038, 102171591, 102168391, 102171471, 102180958, 106502702, 102191581, 102189174, 102183809, 102188180, 102170408, 102182890, 102170987, 102189340, 102169697, 102187248, 102180574, 102185423, 102169137, 102188710, 108638110, 100861232, 102184725, 102180926, 100861293, 102174051, 102170135, 102177406, 102190023, 106…	2608	102	8897	1.27092	1	0.28404	0.252754
KEGG_PATHWAY	chx05340:Primary immunodeficiency	16	0.189506	0.0765672	102172509, 102170826, 102181173, 102171746, 102189385, 102184942, 102183249, 102171809, 102180277, 102171591, 102176695, 102182818, 102180638, 102170124, 102171622, 102189290	2608	36	8897	1.51619	1	0.28404	0.252754
KEGG_PATHWAY	chx05132:Salmonella infection	88	1.04228	0.0780893	102181273, 102173967, 102174814, 102188824, 102184789, 100861321, 102168577, 102185754, 102180102, 102185710, 100861163, 102182759, 102171591, 102180974, 102174462, 102180975, 102177056, 102173138, 102178660, 102173536, 102171396, 102179873, 102175799, 106503410, 102176601, 102173178, 102186374, 102188236, 102169659, 102184353, 102185480, 102172925, 102170108, 102175838, 100846984, 102169137, 102…	2608	260	8897	1.15464	1	0.286604	0.255036
KEGG_PATHWAY	chx04672:Intestinal immune network for IgA production	19	0.225038	0.080949	102180190, 100860848, 102187356, 106503481, 102184760, 102188267, 102186442, 102170227, 102184942, 102189617, 102183249, 102189744, 100860886, 102169556, 102170273, 102186727, 102191364, 102171722, 102189290	2608	45	8897	1.44038	1	0.289423	0.257545
KEGG_PATHWAY	chx05212:Pancreatic cancer	30	0.355324	0.0813006	102189930, 102187410, 102188824, 102186169, 108636541, 102178149, 102171591, 102178569, 102168391, 102171356, 102173018, 102173438, 102191364, 102170562, 102189962, 102169319, 100860902, 102186154, 102170408, 100861013, 102188317, 100846984, 102188710, 102182675, 102169293, 100861297, 102174051, 102170135, 102177406, 102176556	2608	78	8897	1.31209	1	0.289423	0.257545
KEGG_PATHWAY	chx05218:Melanoma	28	0.331636	0.082213	102189930, 102180282, 102179273, 100860838, 102186668, 102188824, 102184426, 102168896, 102186169, 108636541, 102168391, 102169384, 102171356, 102173018, 102171599, 102170562, 102174268, 102186892, 102185860, 102184232, 102170206, 102188317, 100846984, 102188710, 102175285, 102174051, 102170135, 102171226	2608	72	8897	1.32667	1	0.289423	0.257545
KEGG_PATHWAY	chx00562:Inositol phosphate metabolism	28	0.331636	0.082213	102191513, 102170935, 102168613, 102169966, 102189653, 102173924, 102184062, 102182123, 102180522, 102189953, 100861268, 102168391, 102173853, 102177657, 102187288, 102183460, 102190716, 102190639, 102176070, 102187423, 102185202, 102174079, 102177585, 102172073, 102174559, 102172398, 106502498, 102171365	2608	72	8897	1.32667	1	0.289423	0.257545
KEGG_PATHWAY	chx00533:Glycosaminoglycan biosynthesis - keratan sulfate	8	0.094753	0.083399	102182814, 102180329, 102177480, 102190043, 102191287, 102168794, 102191101, 102174236	2608	14	8897	1.94939	1	0.290633	0.258621
KEGG_PATHWAY	chx04514:Cell adhesion molecules	58	0.68696	0.0894081	108633459, 102186442, 102188267, 102181196, 102171703, 108634307, 102169465, 102169543, 102180584, 102189639, 102178060, 102186369, 102177694, 102191361, 102180190, 102171839, 102185683, 102170227, 102186657, 102168321, 102181324, 102181202, 102185917, 102170273, 102186727, 102174073, 102172535, 102173982, 102173346, 102175323, 102187356, 102185210, 102184760, 102170997, 102181695, 100861223, 102…	2608	166	8897	1.19194	1	0.308458	0.274483
KEGG_PATHWAY	chx00052:Galactose metabolism	14	0.165818	0.0911539	102174704, 102190759, 102182403, 102168356, 102179979, 102185429, 102179067, 102186091, 102170730, 102175798, 102191101, 102172661, 102187190, 102177347	2608	31	8897	1.54064	1	0.310857	0.276618
KEGG_PATHWAY	chx04136:Autophagy - other	15	0.177662	0.0934204	102169649, 102185791, 100860902, 102182964, 100861036, 102182258, 102173122, 102180716, 102185716, 102185629, 102171213, 102177934, 106502003, 102174886, 102176205	2608	34	8897	1.50504	1	0.310857	0.276618
KEGG_PATHWAY	chx05142:Chagas disease	41	0.485609	0.093467	108636629, 102169966, 102189653, 102186145, 102179590, 102177052, 102181595, 102185733, 102188824, 102187899, 102171591, 102168391, 102171053, 102189174, 102191364, 102175799, 102189962, 102170408, 102171917, 102169375, 108636634, 102186813, 102187545, 102189208, 102182533, 102185423, 108633243, 102169137, 102188710, 100860742, 108633189, 100861232, 102180926, 102170070, 100861293, 102174051, 102…	2608	113	8897	1.23777	1	0.310857	0.276618
KEGG_PATHWAY	chx04390:Hippo signaling pathway	55	0.651427	0.0937077	102180102, 102190470, 102187092, 102191364, 102176768, 102191366, 102189962, 102180077, 102169375, 102169777, 102182533, 102169259, 102169293, 102182009, 102170070, 102170036, 102171367, 102173944, 102177945, 102172733, 106502497, 102189698, 102185098, 102187079, 102186146, 102188440, 102185094, 106504040, 102180281, 102181571, 108637113, 100861185, 102178402, 102182657, 102169162, 102186619, 102…	2608	157	8897	1.19509	1	0.310857	0.276618
KEGG_PATHWAY	chx04140:Autophagy - animal	51	0.604051	0.0997739	102185791, 106504021, 102180062, 102188824, 102182964, 102185873, 102173295, 102171471, 102185629, 102177816, 102177934, 106502003, 102176205, 102173379, 102175477, 102187423, 102188710, 102182258, 100861297, 100861254, 102175285, 102185716, 102173026, 102169649, 102189930, 102191734, 102186668, 102184689, 102184366, 102168391, 102173110, 102180716, 102175491, 102171213, 102176667, 102174886, 102…	2608	145	8897	1.19988	1	0.327829	0.29172
